# Supplementary material
Source: publisher figshare collection journal article supplement (https://aacr.figshare.com/ndownloader/files/39913194)
Supplement: Supplementary file 1 [file 39913194]

## Sheet: Table S1
Table S 1. Anti-murine isotype controls or fluorescent-conjugated antibodies used in multiplex flow cytometry analyses
Markers	Fluorensence	Clone	ISOTYPE	Company	Catalog
CD3	Pacific blue	500A2	Hamster IgG2, k	BD	558214
CD4	FITC	RM4-5	Rat IgG2a, k	BD	553046
CD8	APC-Cy7	53-6.7	Rat IgG2a, k	BD	557654
PD-1	PE	RMP1-30	Rat IgG2b, k	BioLegend	109104
CD69	PerCP-Cy5.5	H1.2F3	Hamster IgG1	BD	551113
PD-L1	PE	10F.9G2	Rat IgG2b,k	BioLegend	124308
ICOS	PerCP-Cy5.5	C398.4A	Hamster IgG	BioLegend	313518
OX-40	APC	OX-86	Rat IgG1	BioLegend	119414
CD25	APC	PC61	Rat IgG1	BD	557192
Foxp3	PE	FJK-16s	Rat IgG2a	eBioscience	26999
CTLA4	APC	UC10-4B9	Hamster IgG	eBioscience	17-1522-82
CD45R	Pe-Cy7	RA3-6B2	Rat IgG2a, k	BD	552772
CD49B	FITC	DX5	Rat IgM, k	BD	553857

## Sheet: Table S2a-CD4
Table S2A. NanoString gene expression in CD4+ cells
CD4+ cells	Gene	Un.	ACT.	D	T	D+T
1	IL2	36	24537.5	18031	809.5	598
2	IL10	18	727	708	69.5	120
3	IL17A	20	693	923.5	70.5	113
4	IL23R	24	1288.5	990.5	157	240.5
5	CCL3	474	18501	20380	3071.5	4818.5
6	IL9	11	11795	14102	2071	3838
7	CCL4	1086	37275	39064	6552	10206
8	IL3	28	1129	982	221.5	186.5
9	GZMB	284	31404.5	38280.5	6486.5	10315
10	IL17F	18	3567.5	3696	780.5	1302.5
11	IL21	18	2210	1850.5	764	804.5
12	LTA	675	62115.5	55808	21742.5	24175.5
13	IRF8	350	2668.5	2205.5	934.5	820.5
14	CD82	848	3330	3182.5	1334	1056.5
15	TNF	1031	18193	15742.5	7449.5	8055
16	CCL20	31	3771	4067	1625.5	1505.5
17	IL23A	381	1448	1717.5	630.5	649.5
18	PDCD1	100	1853.5	1759	809	734.5
19	TNFSF11	70	260.5	318	120	131.5
20	SLAMF1	511	2671	2956	1310	1405
21	TNFRSF8	43	1045.5	1088	515	602.5
22	IL1R2	110	518	523.5	265	334
23	TNFSF8	414	1316.5	1364.5	694	754.5
24	IL1R1	56	293.5	298	162	211.5
25	IL1A	36	178	257	99.5	112.5
26	CSF2	55	2745	3010	1537.5	1636
27	CTLA4	885	12390	13224.5	6964.5	8445.5
28	IL6	15	291	357.5	175	258.5
29	CDKN1A	603	2204.5	1952.5	1327.5	1201.5
30	ICOS	2083	7427	7618.5	4689	5708.5
31	PSMB7	1324	7353.5	7677	4668.5	5326.5
32	NFATC1	301	940.5	956.5	615	664
33	C1QBP	1450	12683	13291	8497	9977
34	NOTCH1	768	2548	2607	1737.5	1763
35	TFRC	653	5834.5	5193.5	4009	4215
36	CD3EAP	75	841.5	828.5	582.5	629.5
37	TNFRSF4	244	19241	21631	13372	15111.5
38	CCL19	40	218.5	214.5	154.5	174
39	PSMD7	1988	9575	9767.5	6787	7570.5
40	IL21R	273	1705.5	1981.5	1220	1283
41	PSMC2	1531	8360	8593	6014	7042
42	SOCS3	257	4390	4477.5	3184.5	3108.5
43	HPRT1	1045	4848	4923.5	3531	3544.5
44	NFKB1	1125	4325.5	4971	3156.5	3475.5
45	ALAS1	542	1716.5	1790.5	1259.5	1361.5
46	STAT5A	1234	4570	4679.5	3381.5	3335.5
47	POLR1B	252	902.5	890.5	694	739
48	IRF4	1050	37248	36272.5	29110.5	25012.5
49	NFKBIA	3705	22355.5	21442.5	18030.5	16940.5
50	BATF	321	3909.5	4047.5	3338.5	3641
51	IL2RA	574	32813.5	36655.5	28237	31780
52	TMEM173	1811	7459	7485.5	6550	6337
53	TUBB	3382	22616	22959	19864.5	21206
54	TBX21	210	1976.5	1418.5	1748	1491.5
55	UBE2L3	1200	4555	4708.5	4094	4411.5
56	BATF3	9	417.5	503	381	321.5
57	PRDM1	773	2426.5	2396	2230.5	2241
58	TNFRSF9	56	3985	5634	3665	4046
59	BCL2	979	3390.5	3414.5	3141.5	2675.5
60	NFKB2	1920	5857	6207.5	5480.5	5307
61	CD274	218	847.5	897	793.5	800.5
62	TRAF4	213	1316	1413	1271.5	1325.5
63	IFNG	31	6611	6382.5	6442.5	10683
64	PTPN6	1681	5248	4898	5173.5	4756
65	G6PD	1041	3587	3650.5	3557.5	4125.5
66	CISH	394	5999.5	6178.5	5960.5	5202.5
67	IRAK1	950	2981.5	3174.5	3020.5	3513
68	ICAM1	341	1540.5	1550.5	1613.5	1620
69	EBI3	53	401.5	409	425	469.5
70	PSMB8	2716	9007.5	8496	9667.5	9623
71	MAF	717	2829	3079.5	3215.5	3268
72	MAPK11	46	449.5	484.5	521	448
73	IL2RB	1310	6118.5	6166.5	7273.5	7558.5
74	NFIL3	305	1545	1833.5	1870.5	1926
75	CSF1	210	2045.5	2061.5	2550	2521
76	CD7	3285	14627	17450.5	18978	18079
77	MUC1	52	164.5	174	231.5	157.5
78	CD40LG	722	2878	3238.5	4379.5	4752
79	CXCL10	446	1938.5	1444.5	2961.5	2492
80	IL26	21	73.5	55	114.5	106.5
81	FOXP3	261	1033.5	998	1694.5	1485
82	CCL22	683	5145	5597	8837	10279
83	SOCS1	609	5941	6496.5	11593	11116.5
84	LIF	20	1571	1111	3419	3823.5
85	IL22	8	302.5	201.5	789.5	862
86	IL13	44	468.5	582.5	1410.5	1535
87	IL5	18	90.5	96	358	429.5
88	IL4	64	279	245.5	1403.5	1525
89	FCER1A	414	93.5	75	444.5	382.5
90	RARRES3	1801	220.5	228.5	763.5	521.5
91	MX1	1321	351.5	361	1104.5	962.5
92	SH2D1A	1876	911	780	2845	2570.5
93	CD96	5800	542	570	1529	1156.5
94	IKBKE	1395	465	488.5	1244.5	1011
95	DPP4	665	166	171.5	439.5	384.5
96	CXCR4	17513	2567.5	3033.5	6393	5232
97	CD244	157	52.5	42	122	87
98	KLRB1	6542	280.5	267	624.5	524
99	SIGIRR	2680	254.5	276.5	552.5	436.5
100	MS4A1	1649	361.5	301.5	678	488
101	IFIT2	484	54.5	64	102	96
102	CR1	576	48.5	42.5	87.5	100
103	HLA-DPB1	2231	510	469.5	903.5	764
104	SMAD3	2043	356	344	630	513.5
105	PML	303	56.5	59.5	98	81
106	CLEC4E	197	25	36.5	42.5	71.5
107	NCF4	517	102.5	112	171.5	149
108	CCR5	214	52	66	86	97.5
109	HLA-DRA	5632	1655	1634	2625	2312.5
110	CYBB	1545	181	175.5	273	252
111	TNFSF13B	270	43	47.5	63.5	47.5
112	HLA-DRB3	2347	743	718	1097	932
113	IL11RA	609	172	157	250	176.5
114	CCL24	2984	31	38.5	45	55.5
115	HLA-DRB1	3858	1232	1292.5	1788	1620
116	BST1	116	26	26	37.5	30.5
117	MR1	260	69	70	98	91
118	CD24	127	23	25	32.5	26.5
119	SELPLG	529	101	102	141.5	134.5
120	CD79A	822	248.5	228.5	345.5	254.5
121	ITGA4	1478	283.5	287.5	385	375
122	TGFBI	366	22.5	29	29.5	42.5
123	TLR4	132	34	36	44.5	42
124	TCF7	13049	2014	1535.5	2552	1910.5
125	CLEC5A	345	12	21.5	15	10
126	CLEC4A	241	52.5	53	65	57
127	HLA-DMB	703	98.5	97	121.5	104.5
128	TNFRSF17	100	31	38.5	38	44.5
129	CD9	428	90.5	118.5	106	99
130	FCER1G	1902	498	597.5	550.5	630
131	CD14	331	51	61	53.5	53
132	TNFRSF13B	176	46.5	44.5	48.5	44.5
133	FCGR3A	308	48	64.5	50	52
134	PTAFR	274	51.5	60.5	52.5	53.5
135	LILRA2	135	26	32.5	26.5	29
136	TLR1	525	95	90.5	91	71
137	ITGA6	1100	287	255	268	303.5
138	CCL5	4920	879.5	870.5	791	547.5
139	CFH	174	32.5	27.5	29	31.5
140	CD22	340	92.5	84	82.5	74
141	TNFRSF13C	1098	351.5	313.5	300.5	216
142	ITGAX	699	185	246.5	153	168
143	LILRA3	139	36	40.5	29.5	37
144	IL7R	20854	2861	3418	2310	2336.5
145	SPP1	527	65.5	93	49	48.5
146	LAIR1	594	131	141	91	85
147	CD36	464	77	64.5	44	51.5
148	IL12B	10	17	21.5	63.5	88
149	PDCD1LG2	44	37	40.5	121.5	106.5
150	IL8	1919	3085.5	5451	688.5	1246
151	IL1B	536	297	536	57	138.5

## Sheet: Table S2b-CD8
Table S2b. NanoString gene expression in CD8+ cells
CD8+ cells	Un.	ACT.	D	T	D+T
IL2	23.41	6400.89	3139.53	654.635	801.655
CCL3	1757.27	50632.3	48644.7	8840.31	13180
IL3	35.81	1516.77	938.9	289.84	332.57
IL1R1	64.73	325.18	224.02	72.28	77.86
CD82	779.48	4060.92	3202.13	947.21	1196.4
IFNG	192.8	14376.9	17107.7	3702.89	5087.32
GZMB	3400.23	47769.5	62988.3	12972.1	13167.6
CCL4	9925.25	199293	153567	54539.6	68237.5
XCL1	95.02	657.91	517.22	184.56	179.3
LTA	1188.5	63887.8	30858.4	19016.6	23748.6
TNF	1764.15	15021.8	7827.42	4491.64	5166.57
CSF2	50.96	4967.3	3623.81	1696.21	1888.17
IRF8	541.23	1964.02	1933.79	686.765	686.26
TNFRSF4	297.47	6998.3	8008.61	2453.76	2869.34
IL21R	521.95	1922.97	1802.02	710.455	856.38
CCL20	86.76	1191.59	1044.32	470.765	336.71
TFRC	1059.04	4459.55	3109.88	1949.16	2471.7
CD3EAP	207.95	1226.16	1367.16	550.935	732.31
TNFRSF9	415.9	17114.4	17908.2	7919.72	8270.54
C1QBP	2389.39	13227.4	8146.98	6945.3	7419.76
IRF4	1535.54	18928.2	15898.6	10348.5	13123.5
IL17F	33.05	313.29	256.96	172.64	193.22
TRAF4	482.01	3011.93	2085.34	1660.15	2133.21
TNFSF11	41.32	154.49	207.55	86.87	79.055
BATF3	64.73	324.1	270.14	206.615	336.91
IL2RA	257.53	25162.8	20444.9	16727.6	18536
IL9	22.03	136.12	138.36	95.26	90.415
TUBB	3704.58	18524.2	13454.2	13956.5	14458.9
LIF	22.03	1647.49	1409.99	1286.12	1894.21
CSF1	115.68	1209.96	978.43	980.375	1220.28
EBI3	162.51	579.05	546.87	488.3	594.385
CCL22	133.59	1684.22	1617.54	1441.79	1590.27
ICAM1	527.46	1740.39	968.54	1641.63	1569.68
BATF	616.97	1993.19	1370.46	2082.81	2112.32
CISH	285.07	4012.3	2701.38	4992.36	4876.32
IL5	26.17	318.69	329.44	447.505	419.155
IL13	34.43	426.73	306.38	657.84	661.725
SOCS1	521.95	2968.71	2128.16	5618.49	5748.74
NFIL3	318.13	991.73	797.24	1918.08	1594.2
CXCR4	17130.6	559.6	385.44	4883.45	2820.01
CD244	1513.51	180.41	214.13	684.725	482.925
SIGIRR	5343.41	186.9	207.55	621.995	438.895
TCF7	23780.9	636.31	431.56	1798.88	1414.89
CMKLR1	484.76	9.72	42.83	26.725	22.98
CCR5	973.66	96.15	144.95	249.47	235.645
RARRES3	4518.49	401.88	444.74	1005.13	883.12
IKBKE	1508	248.47	345.91	600.225	488.985
CXCR6	3053.18	402.96	368.97	955.255	752.69
GNLY	12906.8	1483.28	1195.86	3433.89	2560.07
SMAD3	3995.16	260.36	161.42	569.625	542.835
SELPLG	1264.24	52.94	82.36	113.975	106.89
KLRB1	18583.5	1602.11	1281.51	3368.65	2809.75
IKBKB	1151.31	235.51	3.29	487.38	444.96
TNFSF12	2068.51	417	362.38	820.105	689.79
FCGR2B	143.23	27.01	59.3	52.145	53.845
FCER1A	214.84	28.09	65.89	52.875	58.095
IL10RA	9875.67	1383.89	925.72	2604.59	2461.95
CD96	10741.9	2504.18	2371.95	4577.3	4216.94
FCGRT	523.32	142.6	62.59	254.02	207.49
TLR1	1008.09	73.46	121.89	129.575	121.505
MX1	1112.75	250.63	72.48	434.08	304.235
ITGAM	813.91	128.56	82.36	217.18	174.14
HLA-DPB1	6639.32	1345	892.77	2259.38	1793.36
TNFSF13B	252.02	23.77	112.01	39.385	39.01
CD247	10071.2	3065.94	2032.63	5044.34	3646.99
TNFRSF13B	258.91	48.61	69.18	79.575	69.795
FCGR3A	2076.77	292.77	210.84	470.34	351.725
GZMA	14479.5	2462.05	1976.62	3949.14	3365.47
MR1	320.88	79.94	59.3	127.81	95.49
CLEC4A	134.96	31.33	42.83	47.965	49.785
CD59	2582.19	550.96	497.45	813.91	887.425
IL11RA	1056.29	162.05	233.9	239.245	230.885
ETS1	29339.2	9395.53	7778.01	13826	12193.8
NCR1	1773.79	323.02	240.49	473.38	424.53
KLRC1	932.34	234.43	148.25	337.71	264.9
NCF4	480.63	106.95	191.07	152.68	143.595
SELL	12197.6	1574.02	1594.47	2244.39	1830.32
MAP4K4	2748.83	714.09	550.16	1002.7	994.73
TRAF5	1948.69	492.63	441.45	688.735	566.625
KLRD1	6514	2144.43	1241.98	2961.6	3027.34
MBP	352.55	63.74	105.42	87.4	67.88
IFNGR1	1755.89	493.71	233.9	672.875	591.31
SYK	555	152.32	98.83	207.39	167.995
CIITA	564.64	162.05	256.96	220.13	231.745
CX3CR1	5207.07	830.76	1179.38	1118.96	777.225
ITGA5	2934.74	345.7	365.67	459.775	395.175
ADA	1317.95	409.44	296.49	543.93	501.965
IRF7	2257.18	468.86	510.63	622.625	593.265
IL12RB1	2152.51	601.74	731.35	793.95	772.315
LAIR1	1207.78	112.35	125.19	146.23	115.285
ITGA6	994.31	126.4	121.89	161.34	184.57
BCL6	1301.42	291.69	207.55	370.09	305.285
IFIT2	137.72	44.29	121.89	55.64	49.16
LILRB1	981.92	237.67	339.32	298.54	260.7
CFH	526.08	64.82	82.36	81.085	65.13
PTPRC	42693.6	9707.74	7580.34	12003.5	10427.4
CXCR2	578.41	50.77	148.25	62.585	55.04
STAT2	3126.17	967.97	751.12	1191.2	1227.14
CASP8	5472.86	795.11	708.29	978.345	939.75
LILRA3	1289.03	248.47	227.31	304.305	243.65
CYBB	997.07	164.21	177.9	197.005	206.44
TGFBI	112.93	19.45	36.24	23.33	28.64
IFNAR2	3627.46	791.87	642.4	943.455	879.055
BTK	329.14	98.31	181.19	116.345	110.165
ITGA4	3843.67	646.03	510.63	759.47	698.375
CD24	152.87	32.41	42.83	38.075	31.995
FCGR2C	444.83	114.51	471.09	133.855	148.045
CASP1	3245.98	840.49	876.3	977.095	907.26
IL18RAP	1680.14	530.44	418.38	613.18	574.895
LILRB3	112.93	30.25	69.18	34.855	45.455
CEBPB	841.45	278.72	131.77	318.34	349.89
JAK1	14701.3	3348.99	1933.79	3783.94	3713.62
RORC	483.39	102.63	59.3	112.97	103.595
CD22	720.26	99.39	177.9	108.535	90.115
C4A	162.51	46.45	131.77	50.135	50.25
LTB4R	556.38	119.92	174.6	128.795	134.035
LY96	327.77	109.11	102.13	115.935	107.82
KIT	129.45	35.65	49.42	37.34	48.23
IFNAR1	871.75	249.55	144.95	260.84	290.79
CD79A	1547.94	432.13	210.84	450.795	424.725
TNFRSF13C	1571.35	513.15	510.63	534.545	470.365
CCL5	58064.1	5384.31	4365.04	5596.82	4673.19
KIR3DL2	433.81	109.11	108.71	113.27	113.685
IL6R	585.3	96.15	56	98.35	86.355
ITGAL	5077.62	1336.35	905.95	1345.55	1373.79
CCR6	694.09	232.27	368.97	227.005	207.795
CFP	106.04	22.69	52.71	22.07	22.98
TNFRSF17	205.2	41.05	32.94	39.66	42.47
IL7R	36380.6	1106.25	840.06	1061.16	847.95
CCL24	232.74	19.45	19.77	17.97	17.02
ITGB1	5712.49	1882.99	1064.08	1721.92	1621.28
CR1	323.63	22.69	19.77	20.635	20.215
TLR3	110.17	24.85	56	22.495	28.905
HLA-DMB	948.87	214.98	247.08	182.58	195.585
PTAFR	118.44	23.77	9.88	17.97	23.21
ATM	126.7	27.01	42.83	20.16	37.11
FCER1G	3210.18	988.49	602.87	733.21	1019.97
CTSG	157	34.57	23.06	25.47	27.995
IL16	11152.3	1954.3	1367.16	1433.47	972.23
C4B	145.98	32.41	3.29	21.44	31.355
IL1B	60.6	116.67	197.66	26.025	40.08

## Sheet: Table S2C
Table S2c. Gene expression changes from CD4+ and CD8+ cells
Human T cells≥	Anti-CD3/CD28 activation for 24 hours	Effect by T on activated T cells (≥3-fold changes)
		Changes by T	Number of genes	Genes
CD4+	Up-regulated by activation (88/525=17%), ≥ 3-fold vs. baseline)	Partially offset the increase (≤ 0.3-fold vs. activation, ≥ 3-fold increase vs. baseline)	10	CCL3, CCL4, GZMB, IL2, IL3, IL9, IL10, IL17A, IL17F, IL23R
		Completely offset the increase (≤ 0.3-fold vs. activation, ≤ 3-fold vs. baseline)	0
		Enhance the increase (≥ 3-fold vs. activation)	3	IL4, IL5, IL13
	Down-reulated by activation (51/525=10%, ≤ 0.3-fold vs. baseline)	Partially offset the decrease (≥3 fold vs activation;≤0.3 fold vs baseline )	0
		Completely offset the decrease (≥ 3-fold vs. activation; ≥ 0.3-fold vs. baseline)	3	FCER1A, MX1, RARRES3
		Enhance the decrease (≤ 0.3-fold vs. activation)	0
CD8+	Up-regulated by activation (39/525=7%, ≥ 3-fold vs. baseline)	Partially offset the increase (< 0.3-fold vs. activation, ≥ 3-fold increase vs. baseline)	7	CCL3, CCL4, GZMB, IFNG, IL2, IL3, LTA
		Completely offset the increase (≤ 0.3-fold vs. activation, ≤ 3-fold baseline	4	CD82,IL1R1, TNF, XCL1
		Enhance the increase (≥ 3-fold vs. activation	0
	Down-regulated by activation (88/525=17%, ≤ 0.3-fold vs. baseline)	Partilly offset the decrease (≥ 3-fold vs. activation;≤ 0.3-fold vs. baseline )	2	CXCR4, SIGIRR
		Completely offset the decrease (≥ 3-fold vs. activation;≥ 0.3-fold vs. baseline	1	CD244
		Enhance the decrease (≤ 0.3-fold vs. activation)	0

## Sheet: Table S3A
Table S3A (D>A). T cell surface marker expression in CD4+ and CD8+ T cells 24 hours post activation after overnight treatment with dabrafenib (D, 100 nM), trametinib (T, 10 nM) or the combination of dabrafenib/trametinib (D+T, 100 nM/10 nM).
Design	Donor	Treatment	CD25		CD69		OX40		PD-1		CTLA-4
			%	MFI	%	MFI	%	MFI	%	MFI	%	MFI
D>A (Dose then activate)	1116 –CD4	DMSO	48.6	647	80.7	49700	54.9	1662	20.6	186	7.42	198
		D	46.6	618	78.5	55000	53.6	1576	19.1	192	7.62	185
		D+T	31.1	310	77	16100	49.7	930	18.8	154	6.58	134
		T	18.8	162	72.8	9374	40.3	655	13.5	129	6.39	184
	1116-CD8	DMSO	36.997	2070	41.571	16800	17.271	542	15.197	482	1.587	296
		D	35.897	2159	47.065	19900	19.965	742	17.097	476	0.746	254
		D+T	25.382	585	41.722	3776	10.822	444	13.582	362	0.413	259
		T	16.111	308	36.6	2381	8.42	406	13.611	362	0.137	224
D>A (Dose then activate)	1107 –CD4	DMSO	64.34	769	94.97	35800	76.97	1667	20.54	174	23.34	275
		D	70.049	828	98.86	41900	65.96	1380	25.449	181	14.949	206
		D+T	68.62	268	92.32	9730	64.52	268	17.42	143	14.92	206
		T	9.23	95.2	94.2	6585	36.6	554	15.53	110	2.51	114
	1107 –CD8	DMSO	50.34	575	88.5	22100	32.6	429	18.94	194	0.73	176
		D	40.91	376	90.31	22000	59.51	788	17.31	180	4.65	205
		D+T	8.09	111	87	5299	29.3	362	13.68	147	1.24	158
		T	1.827	77.1	90.99	3938	11.19	183	11.137	138	7.617	199

## Sheet: Table S3B
Table S3B (A>D). T cell surface marker expression in activated CD4+ and CD8+ T cells following treatment with dabrafenib (D, 100nM), trametinib (T,10 nM) or the combination of dabrafenib/trametinib (D+T,D/T= 100 nM/10 nM) 24hrs post treatment.
Design	Donor	Treatment	CD25		CD69		OX40		PD-1		CTLA-4
	& cell type
			%	MFI	%	MFI	%	MFI	%	MFI	%	MFI
A>D (Pre-activate then dose)	1156 –CD4	DMSO	92.03	6360	93.255	33700	81.455	9183	74.03	2179	37.03	320
		D	86.18	5161	92.786	31800	84.886	9406	70.08	1815	42.28	412
		D+T	87.64	5622	89.835	20700	80.335	6121	67.54	1286	25.04	278
		T	73.51	1935	90.708	22600	78.108	5823	45.61	487	14.41	240
	1156-CD8	DMSO	61.9	1271	79.8	6482	49.8	1377	29.8	491	14.2	284
		D	59.7	1136	81.2	6669	49.2	1358	28.4	472	18.1	332
		D+T	56.9	1120	80.5	5824	44.8	1227	28	444	14.9	349
		T	43.2	547	80.8	6258	36.6	1050	16.2	345	9.19	276
A>D (Pre-activate then dose)	1155 –CD4	DMSO	80.5	6697	92.7	33300	87.6	12600	71.9	4808	29.9	730
		D	78.4	7311	91	32800	88	13900	70.4	4481	31.8	782
		D+T	86	9931	92.9	21700	89.1	10600	69.2	3563	16.1	513
		T	83.8	8781	90.3	20500	86.5	9315	66.5	3087	13.6	527
	1155 –CD8	DMSO	85.52	6239	90.68	24700	44.48	2660	61.52	1232	12.52	270
		D	89.713	7209	89.151	18700	28.851	1823	61.613	1142	5.093	209
		D+T	84.17	5872	91.14	24200	49.44	3041	60.87	1327	14.47	324
		T	89.95	7594	89.11	19500	36.31	2158	62.45	1196	10.65	275

## Sheet: Table S4A
Table S4A. Expression levels of representive genes from NanoString in A375 cells treated with trametinib (T), dabrafenib (D), and in combination (D+T)
Gene list		mRNA expression (Nanostring) from A375 cells												Fold of Change vs. DMSO
		DMSO			T			D+T			D			T	D+T	D		pvalue(MEK/DMSO)	pvalue(BRAF/DMSO)	pvalue(COMBO/DMSO)
Tumor antigens	NY-ESO-1	2289.24	±	111.665	4974.05	±	214.739	4990.11	±	326.294	4736.63	±	522.261	2.17279	2.17981	2.06908		4.32497e-05	0.000170984	0.00136415
	BAGE	117.168	±	7.54567	787.086	±	43.6067	666.495	±	51.793	589.447	±	124.399	6.71756	5.68835	5.03076		1.25737e-05	5.38521e-05	0.0027873
	TRP-1	45.414	±	6.97033	258.4	±	6.95702	233.162	±	17.8191	217.539	±	22.0488	5.68986	5.13415	4.79013		3.03294e-06	7.02848e-05	0.000208733
	gp100	16.0455	±	4.4405	87.4187	±	5.03858	61.8483	±	4.75175	66.0584	±	17.884	5.44816	3.85455	4.11693		5.1254e-05	0.00025927	0.0093018
HLA molecules	HLA-A	173.304	±	27.9565	854.477	±	19.0667	712.282	±	17.1944	736.812	±	144.969	4.93051	4.11002	4.25156		4.03823e-06	9.09189e-06	0.00271403
	HLA-B	362.933	±	21.4931	3329.22	±	164.694	3121.01	±	215.33	3237.99	±	814.785	9.17311	8.59941	8.92173		6.50754e-06	2.49226e-05	0.00363295
	HLA-C	527.627	±	9.83408	3746.72	±	99.7199	3338.99	±	382.974	3216.02	±	564.702	7.10107	6.32832	6.09525		6.2456e-07	0.000220688	0.00118043
	HLA-E	472.201	±	21.385	2496.67	±	118.267	2116.92	±	215.456	1951.17	±	236.794	5.28731	4.48309	4.13208		8.21626e-06	0.000192731	0.000420796
	HLA-DMA	143.852	±	12.261	1663.84	±	105.547	1257.65	±	143.672	1151.06	±	214.508	11.5663	8.74265	8.00168		1.57499e-05	0.000180499	0.00125128
	HLA-DPA1	315.082	±	28.8306	1529.35	±	8.2873	1283.8	±	128.351	1171.48	±	184.869	4.85383	4.07449	3.71801		2.47986e-07	0.000217716	0.00137032
	HLA-DRA	354.689	±	10.982	2439.5	±	114.104	2157.58	±	138.566	1972.85	±	277.945	6.87787	6.08302	5.56221		6.05263e-06	2.32479e-05	0.000545775
	HLA-DRB3	206.471	±	11.9524	1222.62	±	1.86254	915.628	±	69.8715	857.17	±	112.683	5.92151	4.43467	4.15154		1.33847e-08	6.51041e-05	0.00057389
Immune modulators/IFN inducible genes	CD40	54.9106	±	7.44403	263.29	±	3.98689	191.516	±	11.5894	208.883	±	42.7794	4.79489	3.48779	3.80406		1.7914e-06	6.73826e-05	0.00356352
	CD68	1607.78	±	96.3973	10683.6	±	224.976	8030.76	±	999.933	7445.3	±	1304.18	6.64489	4.99493	4.63078		3.52063e-07	0.000378125	0.00150707
	CD70	2288.84	±	159.742	5701.97	±	164.497	5193.74	±	237.73	4606.8	±	213.782	2.4912	2.26916	2.01272		1.34444e-05	6.16641e-05	0.000113763
	CD83	120.574	±	9.91519	475.217	±	11.0813	344.602	±	36.3505	348.459	±	48.2031	3.94128	2.85801	2.89		2.05234e-06	0.000501488	0.00131106
	GBP1	48.4979	±	6.24501	493.939	±	18.9474	452.049	±	19.747	493.778	±	46.2428	10.1848	9.32101	10.1814		2.67049e-06	4.59813e-06	7.84741e-05
	ICOSLG	24.2487	±	3.98424	78.6077	±	11.812	64.2613	±	14.3381	70.7772	±	13.9271	3.24172	2.65009	2.9188		0.00164661	0.00961049	0.00511211
	IL15	22.2837	±	5.04006	106.269	±	3.28673	97.4168	±	4.7127	90.3748	±	11.9188	4.76892	4.37165	4.05564		1.73653e-05	4.65495e-05	0.000804061
	IRF1	83.3685	±	7.06309	250.478	±	4.8513	240.491	±	41.4869	278.714	±	17.5263	3.00446	2.88467	3.34316		4.58175e-06	0.0029456	5.71734e-05
	OX40L	13.868	±	3.27324	114.082	±	12.8353	76.2534	±	13.6035	80.3006	±	28.3367	8.22627	5.49851	5.79035		0.000195827	0.00151363	0.0156842
	SPP1	119.586	±	8.72336	1282.1	±	68.7586	1233.54	±	161.751	998.014	±	75.0757	10.7212	10.3151	8.34559		8.35736e-06	0.000284583	3.59434e-05
	STAT1	296.346	±	29.3202	848.55	±	20.2876	874.303	±	34.4035	764.794	±	4.78837	2.86337	2.95027	2.58074		1.14807e-05	2.46093e-05	1.06887e-05
	STAT3	556.767	±	32.7808	5118.95	±	110.859	4327.23	±	537.818	3892.84	±	772.249	9.19406	7.77207	6.99186		2.74472e-07	0.00026585	0.00171179
	TOX	9.86005	±	3.54072	173.845	±	30.1804	103.096	±	8.0073	102.531	±	19.599	17.6312	10.4559	10.3987		0.000729514	5.0837e-05	0.00128721
	B7-H3	1729.77	±	15.8439	3613.77	±	123.805	3025.22	±	86.391	2972.29	±	292.098	2.08916	1.74891	1.71831		1.27181e-05	1.39447e-05	0.00181836
	PDCD2	601.784	±	198.895	1220.75	±	103.48	1250.04	±	61.1168	1079.75	±	291.521	2.02855	2.07722	1.79425		0.0087646	0.00570655	0.0788733
Immune suppression	CD274	136.304	±	5.12668	64.4178	±	6.87369	84.5445	±	5.47306	90.9216	±	23.5484	0.472605	0.620266	0.667051		0.000130816	0.000280553	0.0310346
	IL1A	71.686	±	9.66739	33.8125	±	2.45493	30.6479	±	7.59744	35.0996	±	12.9881	0.471675	0.42753	0.489629		0.00276659	0.00444758	0.0173371
	IL8	353.064	±	9.7448	78.0819	±	16.1892	53.152	±	15.3825	61.7456	±	11.5806	0.221155	0.150545	0.174885		1.471e-05	8.98611e-06	4.82814e-06
	NT5E	671.695	±	75.8209	186.02	±	30.7642	163.49	±	21.5392	148.16	±	28.1505	0.276941	0.2434	0.220577		0.000504837	0.000365981	0.000360382
	VEGFA	1120.02	±	51.9991	299.56	±	59.8825	459.333	±	48.8756	402.427	±	64.1386	0.26746	0.410112	0.359304		5.70158e-05	8.84415e-05	0.000113501
Apoptosis/tumor suppressors /proliferation	BCL2L11	38.3345	±	8.17529	105.68	±	5.65475	72.6972	±	13.0544	104.351	±	18.1327	2.75677	1.89639	2.72212		0.000301691	0.0180848	0.00453919
	DPP4	4.60007	±	1.95934	197.689	±	15.7598	138.702	±	32.4503	121.298	±	11.8438	42.9753	30.1522	26.3687		3.00543e-05	0.00203006	7.29333e-05
	PIK3IP1	5.79385	±	0.167855	144.798	±	2.3034	85.6692	±	26.5452	91.9727	±	12.6065	24.9917	14.7862	15.8742		5.07696e-08	0.00646409	0.000291376
	RARRES3	9.12342	±	2.80763	266.264	±	12.5832	215.658	±	12.2248	226.38	±	58.7257	29.1846	23.6379	24.8131		4.18958e-06	8.99502e-06	0.00306017
	TP53INP1	29.2777	±	2.72938	1541.03	±	49.2743	1031.67	±	145.719	961.667	±	176.76	52.6347	35.2373	32.8463		7.55278e-07	0.000284449	0.000796784
	MKI67	1660.05	±	16.6059	394.616	±	88.5122	610.43	±	106.856	691.082	±	258.597	0.237713	0.367717	0.416301		1.69096e-05	7.33719e-05	0.00292874
MAPK signaling	AREG	952.917	±	19.2045	37.3143	±	8.83158	39.4656	±	5.11061	32.0851	±	0.675249	0.0391579	0.0414156	0.0336704		1.89153e-07	1.49195e-07	1.26315e-07
	CDKN3	704.441	±	33.9246	273.615	±	41.1902	410.722	±	53.2499	430.319	±	127.838	0.388414	0.583046	0.610866		0.000151693	0.0012883	0.0229664
	DUSP4	1645.55	±	85.8046	610.91	±	47.0782	453.639	±	106.035	353.119	±	47.811	0.371248	0.275675	0.21459		5.23332e-05	0.000111094	2.19595e-05
	DUSP6	2399.82	±	57.2738	306.133	±	39.3801	233.417	±	26.6555	168.53	±	34.1975	0.127565	0.0972644	0.070226		8.0777e-07	4.81119e-07	5.3149e-07
	ETV4	1816.45	±	84.9888	188.419	±	12.8503	198.241	±	11.0481	209.609	±	39.3704	0.103729	0.109136	0.115395		5.14812e-06	5.21273e-06	7.63921e-06
	ETV5	435.379	±	25.008	212.625	±	29.477	232.933	±	38.2018	193.789	±	63.9304	0.488368	0.535014	0.445104		0.000566194	0.00154609	0.00366378
	SPRY4	460.793	±	21.4874	63.6775	±	5.34423	63.2714	±	9.65945	57.9629	±	13.6984	0.138191	0.13731	0.125789		6.39912e-06	8.16008e-06	1.05812e-05

## Sheet: Table-S4B
Table S4B. Expression levels of representive genes from NanoString in 8 tumor cell lines treated with trametinib
		Sample ID	A375						SK-Mel-24						HMV-2				SK-MEL-2				CHL-1				Calu-6				H358				A549					trametinib/DMSO (fold)
			DMSO			Trametinib			DMSO			Trametinib			DMSO		Trametinib		DMSO		Trametinib		DMSO		Trametinib		DMSO		Trametinib		DMSO		Trametinib		DMSO		Trametinib			A375	SK-Mel 24	HMV-2	SK-MEL-2	CHL1	Calu-6	H358	A549
			1	2	3	1	2	3	1	2	3	1	2	3	1	2	1	2	1	2	1	2	1	2	1	2	1	2	1	2	1	2	1	2	1	2	1	2
		Gene list
MAPK	MAPK	DUSP4	1547.42	1682.8	1706.45	595.006	573.843	663.88	2742.13	2815.34	2820.07	395.69	411.245	364.064	2453.9	2492.53	1294.51	1145.69	2152.22	2215.38	422.36	429.213	98.668	98.4046	81.5078	76.157	1873.49	1955.92	136.775	116.218	742.133	743.573	230.706	211.3	1453.2	1482.03	607.604	497.919		0.371248	0.139778	0.493326	0.194975	0.800034	0.0660657	0.297505	0.37664
MAPK	MAPK	DUSP6	2364.58	2368.97	2465.9	328.979	260.661	328.758	2781.73	2655.71	2815.19	678.59	663.623	664.052	1582.63	1556.2	1195.84	1234.27	2276.24	2248.4	1044.54	1030.49	1068.9	1131.27	1235.66	1218.51	4044.45	4177.89	527.188	563.91	1341.21	1346.76	110.816	118.949	121.008	127.71	47.7593	38.5131		0.127565	0.243106	0.774209	0.458606	1.11545	0.132699	0.0854792	0.346868
MAPK	MAPK	ETV4	1757.74	1777.71	1913.91	192.92	198.414	173.924	826.599	803.244	917.497	11.0941	10.0549	6.79585	1564.98	1653.49	47.8726	39.9094	2418.51	2486.66	331.449	357.362	467.645	475.752	125.522	84.415	2245.57	2076.07	339.339	362.802	516.314	513.287	112.761	126.337	761.252	760.319	18.5731	35.7621		0.103729	0.0109702	0.0272744	0.140426	0.222533	0.162471	0.232223	0.0357099
MAPK	MAPK	ETV5	408.215	457.447	440.473	213.227	182.852	241.796	1404.3	1206.68	1657.35	81.3568	71.3897	76.6961	575.702	576.971	255.972	246.27	1286.64	1255.17	357.018	367.762	891.095	911.986	546.917	480.799	956.793	989.273	386.951	386.046	275.696	287.996	101.744	93.8291	303.621	332.64	54.3925	48.1413		0.488368	0.0537547	0.43572	0.285143	0.569977	0.39721	0.34695	0.161151
MAPK	MAPK	SPRY2	846.372	1051.34	1082.8	798.08	694.447	861.135	1579.66	1569.48	1780.65	323.578	307.68	247.563	768.706	840.609	486.542	435.11	726.96	846.826	395.844	348.854	942.485	1132.04	859.907	867.089	1263.6	1427.74	664.828	704.382	289.399	329.614	340.874	277.054	165.011	187.11	91.5386	81.1525		0.789683	0.178267	0.572698	0.473189	0.832478	0.508747	0.998248	0.490431
MAPK	MAPK	SPRY4	438.886	481.835	461.656	69.0451	58.3569	63.6307	2900.52	2155.04	3337.68	38.8294	34.1866	37.8626	610.443	618.295	167.065	158.664	1292.37	1357.79	150.572	116.285	186.03	203.008	135.303	135.798	4595.59	4541.45	726.29	695.286	253.772	292.435	73.8776	68.7095	114.408	115.83	17.2464	24.7584		0.138191	0.0132105	0.265093	0.100694	0.696849	0.155584	0.261049	0.182441
Immune modulation	Pro-inflammation; potent promoter of angiogenesis	IL8	356.367	342.096	360.727	87.3217	87.5354	59.3886	18358.4	60966	8188.5	291.22	298.63	339.793	321.489	342.625	26.3788	39.9094	321.53	279.166	143.943	135.193	2.05558	1.54968	0.815078	2.75266	124.029	146.675	78.7752	58.6143	374.355	400.087	264.404	325.077	66.0045	39.6	63.679	79.7771		0.221155	0.0106229	0.0998144	0.464688	-	0.507528	0.761169	1.35843
Immune modulation	leukemia inhibitory factor (cholinergic differentiation factor)	LIF	368.051	402.738	442.966	227.443	239.263	239.675	4091.27	6484.73	3310.51	584.29	552.013	530.077	181.975	189.882	37.1257	17.5212	144.35	156.448	57.7668	51.0518	56.5285	68.9607	47.2745	55.9708	169.723	156.037	224.206	212.224	419.848	455.022	218.393	243.808	499.434	549.449	586.378	557.064		0.58198	0.12	0.146957	0.361767	0.822742	1.33973	0.528307	1.09015
Immune modulation	Supress DC differentiation/maturation	VEGFA	1092.47	1087.59	1180	359.44	299.565	239.675	2256.35	3144.04	2083.7	1613.27	1700.28	1631	308.806	318.04	185.628	208.308	485.161	460.013	636.382	692.981	456.339	449.407	347.223	365.187	243.395	209.87	317.698	284.987	4129.42	4608.49	1355.72	1387.49	807.455	872.189	1732.6	1618.92		0.26746	0.660675	0.628442	1.40647	0.786545	1.32965	0.313943	1.99538
Immune modulation	CD73	NT5E	584.208	712.536	718.339	211.197	151.728	195.134	2648.79	3374.79	2696.06	514.027	501.739	468.914	3.86007	5.75401	11.7239	8.7606	955.731	1068.58	676.155	659.891	77.0844	78.2588	56.2404	46.7953	2722.1	2914.77	521.128	531.571	2593.63	2991.49	836.632	786.096	277.219	240.57	78.2722	66.0224		0.276941	0.170269	-	0.660001	0.663278	0.186752	0.290545	0.278675
Cytokines	Main pro-inflammatory cytokines	IL1A	60.6116	78.4383	76.0082	36.5533	33.0689	31.8153	2354.64	3810.87	1818.27	587.988	640.496	617.452	0.551439	1.04618	5.86195	1.9468	0.521118	5.7412	9.46996	5.67242	6.16675	2.32452	4.89047	2.75266	7.46037	7.80184	7.79095	11.1165	6.57725	6.65886	3.8883	11.821	8.8006	2.97	9.28653	13.7547		0.471675	0.231211	-	-	-	-	-	-
Cytokines	Main pro-inflammatory cytokines	IL1B	100.776	121.942	132.08	91.3832	91.4258	118.777	1749.36	8496.83	875.697	160.865	213.164	179.605	2.75719	6.8002	1.95398	4.867	3.64783	5.7412	17.0459	7.56323	6.16675	3.8742	4.07539	2.75266	6.52782	7.02166	2.59698	7.07413	6.57725	7.21377	3.24025	5.91049	1.10007	6.92999	3.97994	5.50187		0.850023	0.0497787	-	-	-	-	-	-
Immune modulation	EGFR liagnd	AREG	936.924	974.217	947.61	46.7069	29.1785	36.0574	18.3846	15.2377	9.75319	11.0941	8.04391	4.85418	2.20575	2.09237	1.95398	0.9734	3.64783	10.0471	13.2579	5.67242	14.3891	10.8478	10.596	7.34044	305.875	309.733	49.3427	46.4872	3413.04	3403.79	755.626	797.916	1474.1	1517.67	1075.91	1076.99		0.0391579	-	-	-	-	0.155667	0.227898	0.719608
Immune modulation	EGFR liagnd	TGFA	1396.99	1552.29	1591.19	2016.52	1783.78	2174.05	2403.43	1982.35	2462.68	1094.62	1036.66	1014.52	18.7489	10.9849	39.0796	27.2552	624.821	738.461	441.3	448.121	54.4729	58.113	60.3158	86.2501	498.912	518.042	99.5511	112.176	405.049	442.814	117.297	115.993	88.006	88.1099	100.825	101.785		1.3158	0.459344	-	0.652412	1.30181	0.208197	0.275151	1.15043
Immune modulation	EGFR liagnd	EREG	5.84208	8.56889	8.72225	10.1537	13.6166	8.48409	197.988	546.38	135.848	24.0372	13.0714	19.4167	1.65432	3.66165	11.7239	3.8936	2.60559	4.3059	5.68198	5.67242	22.6114	19.371	4.89047	11.0107	613.616	647.553	220.744	235.468	997.002	997.165	311.712	342.809	1048.37	1053.36	708.429	618.96		-	0.0642176	-	-	-	0.361737	0.328217	0.63157
Immune modulation	Has a mixed function; act as both Th1 and Th2-type cytokine; suppress Treg and also DC differentiation	IL6	13.8749	17.1378	19.9366	28.4303	36.9594	23.3312	50.204	425.204	29.9562	89.6774	85.4666	73.7835	4.41151	6.8002	13.6779	11.6808	5.21118	13.6353	29.3569	21.7443	588.925	556.335	401.833	341.33	4.66273	14.0433	18.1789	17.18	18.6355	23.306	43.4193	53.1944	13.2009	11.88	27.8596	28.8848		-	0.49257	-	-	0.648904	-	-	-
Immune regulation	lymphocyte cytosolic protein 1 (L-plastin)	LCP1	9.49338	11.2055	11.2143	48.7377	31.1237	48.7835	747.403	936.755	629.081	483.518	473.585	404.839	3399.62	3414.75	703.434	772.88	157.378	149.989	64.3957	75.6323	349.449	342.479	444.217	442.261	11.1906	21.065	33.7608	23.2436	1320.38	1353.97	1585.78	1520.47	17.6012	5.93999	19.8997	30.2603		-	0.58876	0.216647	0.455574	1.28117	-	1.1615	-
Immune modulation	PD-L1	CD274	141.67	135.784	131.457	58.8914	62.2474	72.1147	12.0207	12.3353	11.1465	0.924509	3.01647	5.82502	4.41151	2.61546	7.81593	2.9202	14.5913	20.0942	15.1519	12.2902	4.11117	2.32452	4.07539	3.67022	14.9207	11.7028	19.0446	26.2754	160.595	183.119	83.5984	82.0081	14.301	7.91999	13.2665	22.0075		0.472605	-	-	-	-	-	0.481816	-
Immune modulation	programmed cell death 2	PDCD2	376.084	751.426	677.843	1338.26	1180.75	1143.23	217.079	389.649	328.125	441.915	358.96	247.563	124.625	165.82	223.731	112.914	490.372	848.262	1270.87	1055.07	247.698	363.4	326.031	395.466	436.432	610.104	863.93	851.928	509.189	740.799	799.045	520.862	616.042	645.479	717.716	347.993		2.02855	1.1215	1.15907	1.73755	1.18066	1.63956	1.05594	0.844781
Immune modulation	Immune checkpoint ligand	B7-H3	1713.19	1744.76	1731.37	3730.46	3483.91	3626.95	2022.3	2083.21	1965.27	1939.62	1919.48	1852.36	1319.04	1391.95	2592.93	2588.27	966.153	927.921	1516.14	1557.08	2757.56	2756.1	3027.2	2996.73	2295	2378	3485.15	3506.75	3100.63	3090.82	3386.06	3298.79	1097.87	1040.49	1566.77	1521.27		2.08916	0.94081	1.91119	1.62255	1.09255	1.49623	1.07969	1.44411
Immune modulation	Immune checkpoint ligand	B7-H4	0.73026	4.61402	3.11509	22.3381	36.9594	14.8472	7.77809	9.43286	7.66322	9.24509	6.03293	10.6792	5.51439	2.09237	6.83894	8.7606	4.16895	5.02355	18.9399	11.3448	5.13896	6.19872	7.3357	5.50533	4.66273	3.90092	6.92529	12.1271	7.12535	8.87849	72.5815	67.2319	14.301	11.88	102.152	82.528		-	-	-	-	-	-	-	7.05397
HLA-I	major histocompatibility complex, class I, J (pseudogene)	HLA-A	145.322	173.355	201.235	832.602	867.573	863.256	1942.4	2514.22	1924.86	5517.47	5213.46	4206.63	290.057	302.87	1089.35	797.215	749.368	794.438	2025.63	2141.34	53.4452	82.9078	80.6927	94.5081	478.396	528.185	849.214	895.383	2397.41	2629.7	2936.31	2599.14	155.111	135.63	351.561	290.223		4.93051	2.34077	3.18177	2.69915	1.28491	1.73319	1.10112	2.20742
HLA-I	major histocompatibility complex, class I, B	HLA-B	343.953	358.575	386.271	3515.21	3201.85	3270.62	29712.3	33077.4	26495.2	42935.1	42947.5	38424.7	962.261	978.706	2284.21	2337.13	882.774	874.097	1627.89	1603.4	308.337	254.147	290.983	353.259	257.383	277.746	712.439	694.276	3237.65	3267.84	6252.38	6214.88	93.5064	90.0899	254.716	231.078		9.17311	1.39225	2.38095	1.83923	1.14535	2.62874	1.91642	2.64599
HLA-I	major histocompatibility complex, class I, C	HLA-C	516.294	533.908	532.68	3809.66	3631.75	3798.75	5252.33	6030.5	5676.36	9227.53	9039.35	7730.77	860.244	888.211	1792.78	1689.82	1026.08	1175.51	2072.97	2102.58	1348.46	1393.16	1603.26	1717.66	2103.82	2272.68	4656.39	4659.83	2920.3	3066.41	4702.89	4491.97	1042.87	1061.28	2044.36	1954.54		7.10107	1.53295	1.99182	1.89661	1.2113	2.12869	1.53588	1.90048
HLA-I	HLA-I	HLA-E	448.38	489.745	478.478	2491.71	2380.96	2617.34	5503.35	5346.98	5397.7	9320.9	9402.33	9102.56	781.389	785.684	1981.34	1911.76	1261.63	1323.35	2696.1	2720.87	735.899	629.17	746.611	790.015	387.007	408.036	810.259	840.811	576.606	617.61	1107.52	1059.46	647.944	664.289	1097.14	1134.76		5.28731	1.71256	2.48431	2.09556	1.12568	2.07671	1.81456	1.70084
HLA-I	major histocompatibility complex, class I, F	HLA-F	13.1447	14.5012	9.96828	119.813	161.454	150.593	200.816	264.12	172.771	238.523	247.35	228.147	63.9669	60.6787	173.904	166.451	61.4919	67.459	97.5406	99.2673	76.0566	69.7356	53.7951	60.5586	14.9207	9.36221	17.3132	17.18	84.408	103.767	187.286	193.569	27.5019	27.72	65.0057	59.1451		11.4813	1.11967	2.73059	1.52622	0.784362	1.42047	2.02394	2.24822
HLA-II	major histocompatibility complex, class II, DP alpha 1	HLA-DPA1	282.611	324.959	337.676	1529.14	1521.17	1537.74	4463.21	4026.38	4290.71	8420.43	8619.05	8042.41	15.4403	22.493	83.0442	56.4572	433.049	406.19	614.601	621.13	29.806	32.5433	31.788	34.8671	7.46037	9.36221	11.2536	17.18	5.48104	6.10396	7.12854	12.5598	9.90067	14.85	22.553	20.632		4.85383	1.96254	3.67755	1.47244	-	-	-	-
HLA-II	major histocompatibility complex, class II, DM alpha	HLA-DMA	129.986	148.308	153.262	1713.94	1542.57	1735	3560.95	3364.63	4272.6	8507.33	8575.82	7520.1	55.6953	59.6325	96.7221	73.9784	389.796	424.848	758.544	780.903	9.25012	15.4968	8.96585	11.9282	20.516	12.4829	36.3578	42.4448	21.3761	19.9766	98.5035	79.0528	63.8043	64.3499	143.278	94.9072		11.5663	2.19708	1.48013	1.88972	-	-	-	1.85858
HLA-II	major histocompatibility complex, class II, DR alpha	HLA-DRA	350.525	367.144	346.398	2564.82	2412.09	2341.61	21705.1	20682.6	22986.9	41950.5	42869	39593.6	93.1931	102.526	51.7805	58.404	1318.43	1281	1765.2	1660.13	9.25012	7.7484	8.15078	4.58777	15.8533	12.4829	13.8506	11.1165	2.19242	8.87849	8.42464	12.5598	7.70052	13.86	25.2063	13.7547		6.87787	1.90308	0.562973	1.31772	-	-	-	-
CTA/TA	tumor antigen	MART-1/Melan A	4.38156	7.2506	6.23018	10.1537	15.5618	21.2102	12.0207	7.25604	16.0231	25.8863	26.1427	16.5042	1176.77	1108.96	10119.7	9405	2172.54	2157.97	1655.35	1853.94	4.11117	3.09936	2.44523	8.25799	6.52782	5.46129	10.3879	6.06354	1.09621	5.54905	3.8883	6.6493	12.1008	6.92999	15.9198	13.7547		-	-	8.542	0.810362	-	-	-	-
CTA/TA	tumor antigen	gp100	10.9539	19.1152	18.0675	89.3524	81.6997	91.2039	15.5562	17.4145	13.2365	48.999	35.1921	41.746	30006.5	28600.6	154028	148380	10975.8	10962.8	6583.52	7073.51	26.7226	12.3974	20.3769	20.1862	16.7858	14.8235	25.1042	25.2648	16.9912	23.306	24.6259	31.0301	25.3017	24.75	39.7994	53.6432		5.44816	-	5.15992	0.622511	-	-	-	-
CTA/TA	tumor antigen-melanoma	TRP-1	42.3551	53.3908	40.4961	266.027	256.77	252.402	29.6982	21.7681	32.7429	58.2441	53.2909	53.396	23.1604	26.6777	121.147	125.569	12.5068	9.32944	22.7279	11.3448	63.7231	71.2852	66.0213	73.4044	155.735	169.3	228.535	261.743	29.0495	30.5198	27.2181	27.336	97.9067	113.85	160.524	192.565		5.68986	1.95859	4.95034	-	1.03272	1.50838	-	1.66743
CTA/TA	tumor antigen-melanoma	TYR	2.19078	4.61402	4.36112	10.1537	7.78092	14.8472	765.788	501.393	899.384	856.096	863.715	742.69	1131	1182.19	4401.34	4288.8	1118.84	1071.45	1119.35	1238.48	6.16675	10.0729	4.07539	3.67022	6.52782	6.24147	7.79095	3.03177	0.548104	4.43924	8.42464	9.60455	9.90067	7.91999	14.5931	6.87733		-	1.13659	3.75678	1.07649	-	-	-	-
CTA/TA	tumor antigen	MAGE-3	4531.26	5093.87	5018.41	8338.21	7790.65	8021.7	1916.94	2052.73	1868.43	2023.75	2016.01	1946.53	4533.93	4594.32	5374.43	5151.24	6771.93	6860.73	6743.56	6534.63	3565.41	3759.52	3876.51	4118.9	1404.41	1631.36	2038.63	2067.67	4389.22	4687.84	5318.54	4840.69	554.438	568.259	648.73	643.718		1.64923	1.02538	1.15309	0.973998	1.09153	1.35263	1.11922	1.1512
CTA/TA	tumor antigen	MAGE-1	322.775	330.232	326.461	395.994	402.663	364.816	294.86	272.827	288.416	248.693	236.29	233.001	69.4813	69.0482	87.9292	67.1646	265.77	265.53	159.095	143.701	11.3057	7.7484	5.70554	10.0931	6.52782	9.36221	8.65661	16.1694	8.22156	8.87849	11.0168	19.9479	18.7013	22.77	25.2063	17.8811		1.18786	0.838665	1.11957	0.569916	-	-	-	-
CTA/TA	tumor antigen	BAGE	110.269	116.01	125.227	751.373	774.202	835.683	2.1213	9.43286	11.1465	12.9431	7.03842	10.6792	7.1687	5.23092	6.83894	7.7872	11.9857	12.9177	17.9929	6.61782	16.4447	15.4968	10.596	15.5984	4.66273	12.4829	12.1193	16.1694	94.2739	84.9005	144.515	165.494	8.8006	7.91999	3.97994	6.87733		6.71756	1.35065	-	-	-	-	1.73021	-
Apoptosis	apoptosis	PIK3IP1	5.84208	5.93231	5.60716	142.152	145.892	146.351	11.3136	5.80483	9.05654	145.148	145.796	151.45	11.0288	10.9849	187.582	175.212	5.7323	11.4824	51.1378	34.9799	7.19454	12.3974	13.8563	13.7633	25.1788	28.8668	233.729	258.711	15.3469	23.306	132.85	96.0455	23.1016	15.84	90.212	81.1525		24.9917	16.9014	16.4804	5.00257	-	9.11157	5.92182	4.40056
Apoptosis	apoptosis	TP53INP1	26.2894	31.639	29.9048	1504.78	1521.17	1597.13	6.36389	13.0609	13.2365	21.2637	17.0933	6.79585	226.641	219.176	1384.4	1206.04	86.5056	94.7297	453.611	456.63	11.3057	18.5962	17.9317	17.4335	52.2226	63.1949	414.652	361.791	10.9621	14.4275	156.828	115.255	79.2054	94.0499	220.223	198.067		52.6347	-	5.81055	5.02243	-	6.72726	10.7163	2.4143
Apoptosis	BIM	BCL2L11	31.4012	36.253	47.3493	109.66	99.2068	108.172	19.0917	18.1401	32.0462	51.7725	48.2635	64.0752	38.6007	38.7088	74.2513	60.3508	95.3646	97.6003	140.155	149.374	56.5285	72.0601	88.0284	87.1677	48.4924	59.294	212.087	223.341	79.4751	104.322	193.767	183.964	83.6057	71.2799	339.622	354.87		2.75677	2.36888	1.74108	1.50042	1.36245	4.03973	2.05515	4.4839
Apoptosis	retinoic acid receptor responder (tazarotene induced) 3-tumor suppressor	RARRES3	10.2236	5.93231	11.2143	268.057	252.88	277.854	372.641	312.01	396.398	585.214	586.2	687.352	0.551439	2.61546	3.90796	1.9468	47.9429	56.6943	53.9788	63.342	3.08337	3.09936	8.15078	6.42288	28.9089	28.0866	44.1487	55.5825	278.985	288.551	384.941	376.055	52.8036	54.4499	193.69	198.067		29.1846	1.71941	-	1.12122	-	-	1.34088	3.65263
Apoptosis	TRAIL	TNFSF10	2.92104	6.59145	5.60716	18.2766	21.3975	19.0892	21.213	27.573	15.3264	15.7167	11.0604	6.79585	1.65432	2.61546	7.81593	3.8936	2.60559	5.02355	7.57597	9.45403	6.16675	3.8742	4.07539	5.50533	87.6594	63.1949	83.9692	63.6672	34.5306	40.5081	105.632	116.732	8.8006	7.91999	23.8796	26.1339		-	-	-	-	-	0.978669	2.96333	-
	inducible T-cell co-stimulator ligand	ICOSLG	25.5591	19.7744	27.4128	91.3832	68.0831	76.3568	236.171	267.022	253.583	71.1872	70.3842	49.5126	52.9381	64.3403	45.9186	56.4572	39.605	53.8237	78.6007	55.7788	141.835	154.968	175.242	194.522	98.8499	92.8419	59.7306	93.9849	49.8775	52.1611	131.554	124.12	82.5056	98.0099	51.7392	55.0187		3.24172	0.252497	0.872929	1.43831	1.24582	0.801889	2.50566	0.591406
	The colony stimulating factor 1 (CSF1), also known as macrophage colony-stimulating factor (M-CSF), is a secreted cytokine which influences hematopoietic stem cells to differentiate into macrophages or other related cell types	CSF1	158.466	213.563	225.532	659.989	748.914	742.358	514.768	571.051	622.811	1081.68	1054.76	838.802	31.432	27.2008	117.239	55.4838	56.8019	91.8591	133.526	138.029	615.647	795.76	1102.8	1136.85	72.7386	70.2166	145.431	169.779	27.9533	37.7336	103.688	88.6574	409.228	396.99	346.255	356.246		3.60006	1.7413	2.94584	1.82668	1.58682	2.20496	2.92821	0.871354
	Interferon-induced GTP-binding protein Mx1, myxovirus (influenza virus) resistance 1, interferon-inducible protein p78 (mouse)	MX1	125.605	112.055	104.667	680.297	531.048	422.083	118.793	94.3286	105.195	172.883	121.664	106.792	2.20575	5.23092	5.86195	6.8138	35.436	39.4707	54.9258	59.5604	20.5558	27.1194	17.9317	18.3511	5.59528	8.58202	19.9102	27.2859	69.6092	74.9122	204.784	241.591	25.3017	18.81	57.0458	48.1413		4.77155	1.26082	-	-	-	-	3.08864	2.38456
	IFNr induce STAT1/3 dimerization which in turn increase expression of interferon stimulated genes; may be involved in melanoma immune escape, signal transducer and activator of transcription 3 (acute-phase response factor)	STAT3	529.439	547.75	593.113	5129.64	5003.13	5224.08	1560.57	1502.73	1603.7	2819.75	2839.5	2756.2	984.869	932.673	2069.27	1929.28	872.873	937.25	1609.89	1632.71	1621.85	1640.34	1926.03	2102.12	644.39	677.98	927.123	887.299	583.731	604.292	930.599	879.925	2149.55	2167.11	4511.93	4215.81		9.19406	1.80318	2.08525	1.79137	1.2348	1.3721	1.52398	2.02187
	Activation/ Effector	OX40L	13.8749	17.1378	10.5913	103.568	128.385	110.293	51.6182	42.085	45.2827	79.5078	122.67	100.967	9.37446	14.1235	24.4248	24.335	22.9292	33.0119	33.1449	28.3621	10.2779	10.0729	16.3016	21.1038	48.4924	56.9534	67.5216	68.7202	8.76967	14.4275	11.0168	13.2986	18.7013	10.89	29.1862	20.632		8.22627	2.18112	-	-	-	1.29205	-	-
	guanylate binding protein 1, interferon-inducible, 67kDa	GBP1	50.388	41.5262	53.5795	515.807	482.417	483.593	263.041	340.308	303.046	362.408	354.938	318.434	9.37446	9.41566	17.5858	23.3616	69.3087	53.8237	120.269	130.466	40.0839	34.8678	52.165	50.4655	13.9882	12.4829	149.759	151.589	153.469	175.35	344.114	357.585	8.8006	12.87	103.478	97.6581		10.1848	1.14275	-	2.0363	-	11.384	2.134	9.28155
	CD54, intercellular adhesion molecule 1	ICAM1	200.091	208.949	218.056	751.373	700.283	657.517	4490.08	8405.4	2744.83	1077.05	1082.91	1036.85	652.903	609.402	679.009	708.636	526.85	459.296	291.675	316.71	17.4725	16.2716	22.0071	13.7633	75.5363	66.3156	53.671	45.4766	141.959	148.16	238.482	271.144	26.4018	28.71	58.3725	89.4053		3.36339	0.204396	1.09929	0.616932	-	0.698951	1.75661	2.68142
	metastasis suppressor	CD82	20.4473	19.7744	20.5596	111.691	108.933	148.472	508.404	752.452	429.837	134.978	148.812	134.946	54.5924	62.248	124.078	100.26	37.5205	48.8002	41.6678	33.0891	124.363	118.55	169.536	183.511	148.275	131.071	344.533	374.929	5.48104	4.43924	4.53635	6.6493	25.3017	17.82	25.2063	37.1376		6.07252	0.247672	1.92004	-	1.45339	2.57553	-	-
	ligand for CD27-TNFRSF7, regulate B and T	CD70	2108.26	2346.56	2411.7	5881.01	5557.52	5667.37	273.647	314.912	216.66	74.8852	64.3513	65.046	5.51439	5.23092	11.7239	16.5478	126.111	134.2	358.912	312.928	7.19454	5.42388	8.96585	11.9282	90.457	72.5571	109.939	119.25	3.83673	7.21377	6.48049	15.515	191.413	137.61	218.897	242.082		2.4912	0.253698	-	2.58091	-	1.40594	-	1.40105
	VEGFR2	KDR	13.1447	12.5238	13.7064	64.9836	64.1926	74.2358	175.361	187.931	172.074	51.7725	49.269	55.3377	3.86007	4.70783	3.90796	1.9468	26.577	28.706	42.6148	31.1983	27.7504	31.7684	25.2674	27.5266	4.66273	7.80184	9.52228	10.1059	29.5976	31.6296	54.4361	38.4182	13.2009	17.82	19.8997	12.3792		5.16604	0.292098	-	-	-	-	-	-
	toll-like receptor 2	TLR2	6.57234	11.8646	11.2143	10.1537	27.2332	19.0892	284.254	401.259	250.1	95.2244	99.5434	86.4044	6.06583	4.70783	9.76991	15.5744	58.3652	60.2825	107.011	102.104	8.22233	13.1723	10.596	4.58777	6.52782	7.80184	12.1193	16.1694	44.9445	49.9415	58.3244	62.0602	22.0015	13.86	17.2464	28.8848		-	0.300522	-	1.76248	-	-	1.26873	-
	solute carrier family 26 (sulfate transporter), member 2	SLC26A2	678.412	706.604	715.847	4952.97	4616.03	5247.41	2431.71	2298.71	2409.74	736.834	745.067	762.106	571.29	557.616	233.501	230.696	1097.47	1082.22	738.657	781.848	482.034	454.056	472.745	510.16	475.599	464.99	1087.27	1130.85	37.8192	48.8317	128.314	138.158	451.031	443.519	455.04	477.287		7.05253	0.31428	0.411191	0.697579	1.05001	2.35823	3.07523	1.04223
	chemokine receptor	CXCR4	2.19078	4.61402	5.60716	12.1844	17.5071	19.0892	79.9022	114.645	68.969	42.5274	30.1647	19.4167	1.10288	4.70783	4.88496	4.867	2.60559	4.3059	6.62897	4.72702	64.7509	61.2123	83.1379	105.519	22.3811	10.1424	12.1193	9.09532	8.76967	6.65886	15.5532	17.7315	15.401	13.86	27.8596	23.3829		-	0.349537	-	-	1.49771	-	-	-
	MAPK	CDKN3	665.997	717.15	730.177	253.842	320.963	246.039	1566.22	1393.89	1555.63	561.177	530.898	561.143	919.248	917.504	950.612	950.039	1449.75	1423.82	989.611	956.748	978.458	1070.83	1199.79	1268.06	2270.75	2252.39	1578.1	1473.44	1723.79	1751.84	1614.29	1568.5	2207.85	2260.17	2203.56	2346.55		0.388414	0.366101	1.03479	0.677332	1.20425	0.674651	0.915746	1.01837
	proliferation	MKI67	1640.89	1668.96	1670.31	387.871	486.308	309.669	1030.24	949.816	964.869	380.898	372.031	347.559	464.311	446.721	511.943	589.881	1272.57	1244.4	740.551	736.469	1654.74	1540.38	1802.14	1757.12	1842.71	1815.49	1317.54	1220.79	830.378	866.207	868.386	916.865	2802.99	2889.81	3122.93	3130.56		0.237713	0.373689	1.20942	0.586824	1.11396	0.693874	1.05226	1.09849
	MAPK	BIRC5	1865.08	2132.34	1968.11	481.285	603.021	396.631	1954.42	1998.31	2021.7	786.757	816.457	840.744	1722.69	1733.53	1717.55	1818.31	3797.39	3887.51	2329.61	2166.86	4395.86	4517.32	4817.11	5086.01	2400.37	2481.77	2128.66	2159.63	3365.91	3483.7	3360.14	3172.46	4986.64	4989.59	4591.52	4438.63		0.248249	0.40907	1.02304	0.585106	1.11106	0.878364	0.953718	0.905167
	MAPK	PHLDA1	7095.21	8069.92	8469.92	6939.03	6697.43	6961.19	12292.2	13958.4	13072.1	5682.96	5683.02	5491.05	6590.8	6896.45	7506.22	6221.98	3957.89	4359	1345.68	1334.91	464.562	527.666	358.634	366.104	8307.12	8874.59	2687.88	2698.28	9126.48	9543.26	2889.65	2646.42	1913.03	2006.73	513.412	460.781		0.871488	0.428684	1.01787	0.322307	0.730416	0.313482	0.296527	0.248534
	chemokine (C-X3-C motif) ligand 1	CX3CL1	5.84208	1.97744	8.09923	24.3688	27.2332	25.4523	125.156	100.859	104.498	51.7725	54.2964	47.571	33.6378	40.2781	91.8372	99.2868	138.096	145.683	94.6996	101.158	76.0566	61.2123	67.6514	55.0533	39.1669	30.4272	27.7012	35.3707	60.2915	42.1728	31.1064	29.5525	17.6012	9.89999	11.9398	13.7547		-	0.464851	2.5857	0.690177	0.8939	-	0.592	-
	aldo-keto reductase family 1, member C2 (dihydrodiol dehydrogenase 2; bile acid binding protein; 3-[truncated]	AKR1C2	98.5851	104.145	110.274	631.559	641.926	612.975	100.408	134.237	119.825	72.1117	55.3019	41.746	1.65432	5.75401	9.76991	6.8138	21.3658	20.0942	50.1908	51.0518	5.13896	3.8742	3.26031	7.34044	41.032	49.9318	65.7903	64.6778	3.28863	8.87849	11.6649	26.5972	62958.4	64174.7	97513.8	92954		6.02695	0.477219	-	-	-	-	-	1.49818
	VEGFR1	FLT1	9.49338	11.2055	10.5913	64.9836	44.7403	59.3886	123.742	103.761	103.802	63.7911	52.2854	47.571	33.6378	31.9086	39.0796	39.9094	373.121	386.813	435.618	455.684	1030.87	1088.65	1090.57	1183.65	13.9882	12.4829	17.3132	11.1165	3.83673	7.21377	3.8883	7.38812	9.90067	7.91999	11.9398	19.2565		5.40466	0.493947	-	1.17287	1.07299	-	-	-
	RANKL-receptor, NFkB,tumor necrosis factor receptor superfamily, member 11a, NFKB activator	TNFRSF11A	26.2894	40.2079	54.8256	83.2602	58.3569	106.051	197.281	222.761	189.491	98.9225	102.56	101.938	4.96295	5.23092	8.79292	15.5744	38.5627	55.9767	106.064	89.8133	67.8342	66.6362	82.3228	84.415	18.6509	16.3839	39.8204	46.4872	23.0204	37.7336	40.8271	59.1049	137.509	173.25	302.475	243.458		2.0414	0.497792	-	2.07191	1.23996	-	1.64487	1.75677
	integrin, alpha 3 (antigen CD49C, alpha 3 subunit of VLA-3 receptor)	ITGA3	3760.84	3878.41	3896.35	6782.66	6271.42	6698.19	6319.34	5717.04	6396.7	3206.2	3092.88	2964.93	1794.38	1864.3	746.421	720.316	1348.65	1352.05	1334.32	1308.44	10.2779	9.29808	17.1166	16.516	3296.55	3172.23	1899.26	1937.3	4578.86	4835.45	4369.8	4112.96	3993.27	3900.6	4279.76	3973.72		1.71229	0.502576	0.400892	0.978543	-	0.593089	0.90105	1.04556
	late T cell activation	CD96	1000.46	1011.79	1011.78	6262.79	6193.61	6674.86	2665.06	2522.2	2660.53	1347.93	1329.26	1291.21	49.078	53.3554	17.5858	10.7074	977.618	898.497	572.933	511.463	1070.96	1142.11	707.487	684.496	5.59528	11.7028	15.5819	21.2224	7.12535	11.0981	18.1454	15.515	4.4003	10.89	11.9398	12.3792		6.32642	0.505672	-	0.578001	0.628982	-	-	-
	minichromosome maintenance complex component 10	MCM10	575.445	638.712	590.621	85.2909	89.4806	67.8727	148.491	167.615	165.108	86.9039	66.3623	95.1419	422.953	435.213	457.232	418.562	649.834	660.955	374.064	357.362	651.62	651.64	668.364	631.278	897.11	897.992	666.559	710.445	411.626	438.93	386.237	364.973	932.864	926.639	736.289	680.856		0.134446	0.516212	1.02054	0.558004	0.997223	0.76709	0.883199	0.76211
	B-cell CLL/lymphoma 2	BCL2	66.4537	101.508	93.4526	50.7684	56.4117	44.5415	100.408	123.353	104.498	49.9235	64.3513	57.2793	111.391	101.48	306.775	273.526	228.771	277.013	256.636	243.914	611.536	657.839	656.953	658.804	6.52782	7.02166	11.2536	19.2012	1.64431	6.10396	3.8883	3.69406	75.9052	65.3399	90.212	79.7771		0.580386	0.522618	2.72607	0.989653	1.03654	2.24767	0.978587	1.2035
	Attract CD4 expressing cells	IL16	3.6513	5.27316	4.98414	12.1844	23.3428	14.8472	115.257	110.292	108.678	77.6588	57.3129	42.7168	255.316	265.208	490.45	386.44	131.843	119.13	71.0247	73.7415	8.22233	4.64904	2.44523	5.50533	7.46037	7.02166	8.65661	14.1483	1.64431	4.43924	5.18439	5.17168	11.0007	13.86	6.63323	1.37547		-	0.531639	1.68463	0.57682	-	-	-	-
	MAPK	NME1	6906.07	7525.46	7576.52	4305.16	4304.79	3872.99	3893.99	4465.37	3851.81	2201.26	2291.51	2191.18	5343.44	5387.33	2711.15	2753.75	7608.33	7795.83	5219.84	4892.46	8047.61	8317.13	6803.45	7322.09	5136.47	5381.71	4494.51	4634.57	5825.25	6000.75	4667.9	4536.3	11975.4	12183.9	9732.28	9409.57		0.567199	0.547363	0.509274	0.656466	0.863169	0.867934	0.778302	0.792317
	Supress DC differentiation/maturation	VEGFC	1531.36	1748.05	1644.77	3025.8	3013.16	2948.22	106.065	179.95	91.9587	73.9607	77.4227	64.0752	28.1234	27.7239	30.2867	29.202	41.6895	52.3884	104.17	91.7041	15.4169	20.1458	19.5619	14.6809	8.39292	13.2631	16.4476	15.1589	133.737	153.154	208.024	226.815	271.719	273.24	196.344	173.309		1.82511	0.570036	-	2.08204	-	-	1.51569	0.678314
	guanylate binding protein 4	GBP4	2.92104	5.27316	4.98414	22.3381	27.2332	23.3312	72.8312	85.6213	57.8225	44.3764	47.258	32.0376	2.75719	4.70783	13.6779	6.8138	44.8162	45.9296	42.6148	36.8707	5.13896	3.09936	9.78093	6.42288	13.0556	14.0433	19.9102	14.1483	47.137	41.6179	73.2296	80.5305	7.70052	8.90999	15.9198	17.8811		-	0.571828	-	-	-	-	1.73241	-
	MAPK	EGFR	552.807	581.366	606.196	402.086	404.608	439.052	231.221	262.669	236.863	173.808	136.747	119.413	72.7899	76.8946	155.342	125.569	5.21118	17.2236	23.6749	8.50863	6.16675	6.97356	9.78093	13.7633	1242.15	1335.68	671.753	683.159	530.565	563.784	500.294	421.123	1746.92	1767.15	2657.27	2517.1		0.715794	0.588389	1.87668	-	-	0.525603	0.841977	1.47248
	COX2, Prostaglandin-endoperoxide synthase 2	PTGS2	19.717	27.025	28.6588	38.584	21.3975	33.9364	92.6299	190.108	70.3623	61.9421	79.4336	73.7835	11.5802	12.0311	33.2177	23.3616	1.56335	2.15295	4.73498	2.83621	9.25012	0.77484	4.89047	11.0107	1890.27	1788.18	1167.78	1230.9	37.2711	42.1728	93.9672	104.172	689.747	697.949	501.472	484.164		-	0.609343	-	-	-	0.652088	2.49408	0.710268
	repression of IL2, basic leucine zipper transcription factor, ATF-like 3	BATF3	86.1707	86.348	89.7145	69.0451	36.9594	59.3886	142.834	173.419	156.748	101.696	104.571	109.704	63.9669	73.2329	42.9876	45.7498	134.448	138.506	157.201	126.684	286.754	323.883	255.119	245.905	34.5042	33.5479	50.2084	47.4978	13.7026	23.306	20.0895	22.9032	375.126	366.3	476.266	449.778		0.63071	0.668014	0.646775	1.04005	0.820494	-	-	1.24901
	inhibitory for B cell receptor	CD22	132.907	116.669	107.159	125.906	112.823	91.2039	1489.86	1368.49	1465.77	979.055	1011.52	1007.73	249.25	274.1	203.214	198.574	404.388	395.425	456.452	451.903	56.5285	52.6891	63.5761	92.673	11.1906	16.3839	12.1193	7.07413	57.5509	74.3573	20.7376	24.3808	16.5011	16.83	29.1862	24.7584		0.924868	0.693392	0.767722	1.13571	1.43062	-	0.342043	-
	regulate C1, innate? complement component 1, q subcomponent binding protein	C1QBP	13840.6	14353.5	14178	11686.9	11282.3	11105.7	4201.58	4474.08	4179.94	2951.03	3052.66	2972.7	9069.51	9005.03	7020.66	7438.73	3550.38	3515.05	3032.28	2819.19	8557.39	8365.94	7425.36	7596.44	10881.9	10761.9	10281.5	10432.3	6622.19	6722.68	5488.98	5714.71	16877.4	17344.8	13663.1	13794.6		0.804181	0.698248	0.799986	0.828184	0.887638	0.957034	0.83955	0.802337
	An essential function of a modified proteasome, the immunoproteasome, is the processing of class I MHC peptides. proteasome (prosome, macropain) subunit, beta type, 9 (large multifunctional peptidase 2)	PSMB9	545.504	576.093	612.426	2026.68	1918	2002.24	1190.05	1520.14	1106.99	860.718	962.253	878.607	68.3784	69.0482	34.1947	51.5902	698.819	692.532	584.297	600.331	97.6402	117.001	73.357	84.415	96.0523	130.291	334.145	321.368	809.002	827.919	909.861	947.895	541.237	566.279	1434.11	1379.59		3.42955	0.707743	0.624224	0.851423	0.735051	2.8961	1.13491	2.54055
	HLA complex P5	HCP5	13.1447	14.5012	11.2143	290.395	268.442	263.007	347.186	441.167	287.719	285.673	286.564	199.992	7.72014	1.04618	5.86195	26.2818	12.5068	16.5059	24.6219	11.3448	4.11117	9.29808	5.70554	5.50533	4.66273	7.02166	12.1193	14.1483	66.8687	83.2358	115.353	122.643	19.8013	16.83	21.2263	20.632		21.1487	0.717638	-	-	-	-	1.58553	-
	aka MCP-1; attract mainly monocytes by interacting with CCR2	CCL2	8.76312	8.56889	5.60716	38.584	60.3021	59.3886	14492.7	21480.1	10598.2	11294.7	11667.7	11047.1	6.06583	2.61546	4.88496	10.7074	8.85901	13.6353	20.8339	12.2902	5.13896	6.97356	5.70554	7.34044	11.1906	7.80184	10.3879	12.1271	3.28863	7.21377	4.53635	16.2539	169.412	172.26	1268.27	1122.38		-	0.730274	-	-	-	-	-	6.99694
	4-1 BB ligand	CD137L	379.735	400.101	401.846	590.944	638.036	555.708	230.514	275.73	180.434	173.808	178.977	165.042	35.8435	36.6165	26.3788	25.3084	106.308	136.353	216.862	225.951	66.8064	72.8349	62.761	77.9922	27.0438	21.8452	23.3729	25.2648	15.895	22.1962	19.4415	28.8137	130.909	150.48	151.238	162.305		1.51029	0.754105	-	1.82482	1.00796	-	-	1.11427
	homer homolog 1 (Drosophila)	HOMER1	303.788	295.956	287.211	373.656	427.951	419.962	162.633	159.633	119.825	130.356	127.697	91.2586	201.827	204.529	239.363	230.696	150.603	152.142	168.565	189.081	340.199	352.552	321.956	305.546	214.486	232.495	321.16	367.855	316.804	317.406	394.662	401.175	157.311	191.07	171.137	182.937		1.37726	0.790136	1.15677	1.18134	0.905811	1.54149	1.25485	1.01634
	interferon regulatory factor 1	IRF1	75.2168	87.6663	87.2225	251.811	245.099	254.523	226.272	275.73	166.501	187.675	148.812	201.934	33.6378	36.0934	32.2407	40.8828	109.956	108.365	119.322	114.394	72.9732	61.2123	70.0967	66.9815	218.216	244.978	438.025	439.607	399.02	429.497	487.981	471.362	159.511	157.41	407.281	372.751		3.00446	0.805415	-	1.07051	1.02156	1.89474	1.1579	2.46128
	programmed cell death 1 ligand 2	PDCD1LG2	81.0589	85.6889	84.7304	125.906	151.728	150.593	67.1744	106.664	55.7325	68.4137	65.3568	51.4543	7.1687	8.89257	15.6319	14.601	32.8304	32.2942	57.7668	43.4885	7.19454	14.722	10.596	13.7633	12.1231	11.7028	24.2385	16.1694	35.0787	36.0688	31.1064	33.9853	18.7013	21.78	22.553	30.2603		1.70284	0.806831	-	-	-	-	-	-
	TNFa inducible, inhibit NF-kappa B activation as well as TNF-mediated apoptosis.	TNFAIP3	284.801	282.114	273.505	257.904	280.113	224.828	293.446	511.551	179.041	234.825	270.477	289.309	411.373	377.149	107.469	108.047	90.6746	99.0356	112.693	102.104	619.758	629.945	759.652	779.004	57.8179	46.811	314.235	384.024	66.3206	82.6809	98.5035	121.904	78.1053	88.1099	321.049	242.082		0.907695	0.807501	0.273317	1.13223	1.23122	6.67368	1.47923	3.38796
	IL4 receptor, OE on many tumors	IL4R	242.446	244.543	214.318	320.856	272.332	309.669	27.5769	31.201	22.293	29.5843	21.1153	16.5042	44.6665	47.0783	84.0212	79.8188	53.1541	57.412	102.276	78.4685	341.227	324.658	413.244	422.075	663.04	670.178	245.848	265.785	270.215	298.539	204.136	236.42	257.418	227.7	632.81	642.343		1.28739	0.828951	1.78582	1.63472	1.25445	0.383758	0.774597	2.62855
	insulin-like growth factor 1 receptor	IGF1R	562.3	660.464	619.903	1841.88	1801.28	1942.86	630.025	674.086	693.173	549.158	555.03	602.889	1065.93	1071.82	2180.64	1890.34	768.649	845.391	875.025	848.972	789.344	870.145	661.843	690.001	933.479	851.961	1993.62	1941.34	668.687	688.638	988.923	891.007	2514.77	2668.05	4449.57	4140.15		3.03149	0.854699	1.90434	1.06812	0.814615	2.20392	1.38503	1.65735
	sushi-repeat-containing protein, X-linked 2	SRPX2	178.914	154.24	170.084	670.143	688.612	680.848	339.407	323.619	342.058	312.484	287.57	276.688	27.5719	32.4317	29.3097	44.7764	754.579	747.073	2458.4	2404.16	49.334	55.7885	49.7197	45.8777	81.1315	92.0617	179.192	171.8	642.926	718.048	728.407	707.781	49.5034	46.5299	58.3725	68.7733		4.05296	0.872306	-	3.23814	0.909392	2.02659	1.05527	1.32398
	Immuno-suppression, interleukin 13 receptor, alpha 2	IL13Ra2	3259.88	3115.78	3110.73	3405.55	3345.8	3537.86	265.162	240.901	282.843	212.637	248.356	233.972	1.65432	3.13855	4.88496	1.9468	1426.82	1265.93	1525.61	1438.9	6.16675	3.8742	3.26031	1.83511	22.3811	26.5263	13.8506	9.09532	2.19242	5.54905	3.24025	8.86574	5.50037	6.92999	1.32665	2.75093		1.08463	0.880923	-	1.10092	-	-	-	-
	HLA-I	HLA-G	5.84208	8.56889	9.96828	40.6147	29.1785	29.6943	104.651	69.658	56.4292	95.2244	76.4172	33.9793	8.27158	8.36948	17.5858	45.7498	16.6758	13.6353	11.364	14.181	20.5558	20.1458	19.5619	25.6915	4.66273	7.80184	5.19397	4.04236	18.6355	11.0981	10.3688	32.5077	6.60045	7.91999	10.6132	27.5093		-	0.891145	-	-	-	-	-	-
	expressed in DC	CD83	119.032	131.17	111.52	467.069	470.746	487.835	225.565	231.468	193.671	182.128	199.087	202.905	235.464	232.776	448.439	365.025	331.952	393.99	325.767	296.857	191.169	227.028	202.139	195.439	58.7504	61.6345	84.8348	76.8049	128.256	146.495	145.811	149.24	47.3032	66.3299	47.7593	63.2715		3.94128	0.897675	1.73728	0.857677	0.950696	1.34269	1.07388	0.977098
	MAPK	FASN	3285.44	3377.46	3448.4	2767.89	2787.52	2674.61	1637.64	1482.41	1740.25	1488.46	1471.03	1423.25	5178.01	5340.25	4011.53	3727.15	2678.03	2737.11	2115.59	2214.13	5782.35	5891.11	5562.91	5462.2	1766.24	1794.42	1636.1	1541.15	7397.21	7181.03	8610.63	8268.04	3854.66	4016.43	3605.83	3444.17		0.813942	0.901742	0.735737	0.799559	0.944459	0.892319	1.1578	0.895682
	KIAA1549 protein	KIAA1549	419.9	417.898	423.652	678.266	622.474	632.065	27.5769	29.0242	25.0796	31.4333	27.1482	21.3584	97.0532	104.618	342.924	342.637	296.516	260.507	436.565	443.394	1948.69	1980.49	2511.25	2573.74	350.637	367.467	388.682	376.95	231.848	225.846	291.622	264.495	374.025	392.04	493.513	484.164		1.53221	0.978688	3.39939	1.57975	1.29416	1.06619	1.21504	1.27623
	MAPK	TIMP1	2930.53	3065.68	3048.43	5249.45	5014.8	5300.43	9618.67	9593.21	9914.82	9903.34	9838.71	9112.27	1783.35	1824.02	2048.75	1902.02	2177.75	2264.9	2520.9	2553.53	1998.03	1951.05	2173.81	2227.82	4033.26	4150.58	2152.03	2250.59	1546.75	1671.37	940.32	964.888	2054.94	1924.56	2150.49	1961.42		1.72087	0.990649	1.09519	1.14221	1.1146	0.537965	0.592024	1.03327
	Galectin-1 may act as an autocrine negative growth factor that regulates cell proliferationGalectin-1 induces the differentiation of Dendritic cells towards a phenotype which dampens T helper 1 cells and T helper 17 cells and dampens inflammation via interleukin-10 and interleukin-27.[8] It also plays a role in the formation and expression of HLA-G in the syncytium	LGALS1	20568.5	20915.3	21714	72584.6	67592.9	71864.5	60708	66077.2	60439.8	62747.4	63820.4	62372.3	23894.9	24501.6	30228.1	31484.6	45741.7	45440.8	89102.9	84075.7	123597	124169	162575	172352	34937.9	35167.6	29569.3	29493.1	16405.9	16758.1	13598.7	12865.7	20628.6	20710.8	31603.4	30329		3.35521	1.00916	1.27515	1.89925	1.35179	0.842479	0.797984	1.49815
	ubiquitin associated and SH3 domain containing, B	UBASH3B	410.406	518.747	514.613	121.844	87.5354	127.261	707.806	817.03	768.412	807.097	751.1	761.136	426.814	458.752	170.973	137.249	662.862	720.52	809.682	754.432	166.502	203.008	189.098	206.45	176.251	225.473	108.208	127.334	37.2711	41.6179	20.7376	16.9927	616.042	696.959	366.154	320.484		0.233169	1.01137	0.348052	1.13064	1.07047	0.586327	-	0.522953
	Suppress DC differentiation	PEG2	740.484	818.658	755.097	1151.43	1052.37	1043.54	310.416	394.729	301.652	343.917	350.916	324.259	433.982	457.706	668.262	584.04	385.627	434.896	529.371	541.716	511.84	602.825	593.377	626.69	1083.62	1103.18	1375.54	1387.54	1001.93	1086.5	931.895	896.178	1100.07	1023.66	971.105	874.797		1.4032	1.01221	1.40442	1.30537	1.09456	1.26353	0.87533	0.869178
	HER3 liagnd	NRG1	134.368	147.649	135.818	266.027	262.606	229.07	108.893	152.377	103.105	125.733	130.714	119.413	14.8888	19.8775	11.7239	8.7606	10.4224	11.4824	34.0919	23.6351	1222.04	1284.68	1387.26	1358.9	7.46037	3.90092	6.05963	12.1271	246.647	292.99	272.181	229.77	1523.6	1643.4	2454.3	2262.64		1.81341	1.03152	-	-	1.09552	-	0.930165	1.4894
	OPN, IL-17 production, SMAD family member 3	SPP1	109.539	125.238	123.981	1289.52	1209.93	1346.85	12795.7	14047.7	13504.7	14639.6	14126.1	13507.2	4209.13	4263.72	3873.77	3755.38	204.278	269.119	510.431	448.121	2.05558	3.8742	3.26031	1.83511	19.5835	14.8235	19.9102	14.1483	226.915	248.043	357.075	410.04	3530.14	3642.21	5928.78	5664.17		10.7212	1.04771	0.900422	2.02484	-	-	1.61512	1.61634
	interleukin 7 receptor	IL7R	672.57	765.268	808.054	2455.16	2396.52	2460.39	251.02	382.393	247.313	335.597	296.619	318.434	167.637	185.175	128.963	129.462	30.746	29.4236	63.4488	56.7242	327.865	372.698	294.243	330.32	1099.47	1203.82	1694.97	1801.88	186.904	178.125	228.113	214.255	13.2009	9.89999	10.6132	22.0075		3.25575	1.07939	0.732472	1.99724	0.891515	1.51819	1.21188	-
	aminoadipate aminotransferase	AADAT	204.473	220.814	229.894	272.119	285.949	284.217	104.651	100.859	78.7222	96.149	117.642	94.1711	260.83	248.469	293.097	323.169	136.533	163.624	130.685	143.701	139.78	147.994	197.249	178.923	79.2664	50.712	104.745	123.292	310.775	302.978	438.729	438.854	162.811	155.43	179.097	185.688		1.28558	1.08349	1.21003	0.914144	1.30718	1.75442	1.42986	1.14626
	CDC42 small effector 2	CDC42SE2	346.143	319.026	325.838	737.157	758.64	780.536	436.28	521.709	419.387	565.8	492.69	433.964	329.209	304.963	517.805	547.051	800.438	757.838	817.258	939.731	477.923	462.579	595.822	544.11	543.675	543.788	633.664	668	684.582	669.216	1115.29	1105.26	1018.67	982.079	1244.39	1429.11		2.29699	1.08355	1.67913	1.12752	1.21205	1.19697	1.64024	1.33625
	the immunoproteasome, is the processing of class I MHC peptides.proteasome (prosome, macropain) subunit, beta type, 10	PSMB10	235.874	305.184	270.39	2388.15	2182.55	2301.31	574.164	737.94	589.372	708.174	718.925	643.664	95.9503	89.4488	339.016	259.898	367.388	412.648	734.869	686.363	131.557	120.1	142.639	182.593	441.094	508.68	1315.81	1248.08	535.498	563.784	1137.33	1000.35	204.614	217.8	914.06	691.86		8.46882	1.08903	3.2304	1.82201	1.29236	2.69947	1.94461	3.80177
	suppressor of cytokine signaling	SOCS3	161.388	185.879	204.35	410.209	437.677	400.873	151.319	157.456	194.367	204.317	172.944	180.576	69.4813	81.6024	113.331	92.473	37.5205	47.3649	70.0777	58.615	49.334	64.3117	62.761	64.2288	137.084	143.554	91.7601	99.0379	173.749	185.893	181.454	163.277	313.521	281.16	228.183	204.945		2.26382	1.1087	1.36219	1.51608	1.11742	0.679872	0.958539	0.728336
	nuclear factor of kappa light polypeptide gene enhancer in B-cells 1	NFKB1	267.275	268.931	280.981	412.24	332.634	326.637	441.23	523.161	385.251	478.896	516.821	504.835	265.793	252.13	438.669	456.525	272.024	271.989	320.085	339.4	260.031	283.591	337.442	331.237	308.673	338.6	274.415	297.114	365.586	379	410.215	429.988	251.917	264.33	465.653	429.146		1.31122	1.11182	1.72843	1.21226	1.23004	0.882979	1.12842	1.73328
	IFNr induce STAT1/3 dimerization which in turn increase expression of interferon stimulated genes	STAT1	263.624	305.184	320.231	850.879	867.573	827.199	699.321	764.787	737.063	845.926	859.693	765.99	512.838	569.647	1061.99	960.746	756.664	811.661	989.611	987.946	464.562	557.885	624.35	570.719	1141.44	1225.67	1918.31	1937.3	731.171	772.983	1111.4	957.5	2659.98	2758.14	4383.24	4085.14		2.86337	1.12286	1.8686	1.26094	1.16883	1.62883	1.37546	1.56297
	a group of major histocompatibility complex (MHC)-associated genes,butyrophilin, subfamily 3, member A1	BTN3A1	21.9078	28.3432	31.7739	140.121	112.823	120.898	46.6685	65.3044	60.6091	83.2058	61.3348	49.5126	26.4691	27.2008	57.6425	36.9892	52.1118	47.3649	68.1837	59.5604	46.2506	41.0665	63.5761	69.7342	13.0556	10.9226	32.8951	39.413	20.828	26.0806	54.4361	57.6273	40.7028	35.64	49.0859	82.528		4.55767	1.12441	1.76322	1.28416	1.52674	-	2.38898	-
	inhibitor of kappa light polypeptide gene enhancer in B-cells, kinase epsilon	IKBKE	112.46	138.421	142.048	365.533	361.813	369.058	86.2661	135.688	89.8687	115.564	119.653	116.5	49.6295	53.3554	97.6991	90.5262	62.5342	63.1531	92.8056	101.158	60.6397	78.2588	92.9189	107.354	136.152	141.993	180.058	165.737	88.7929	115.42	136.09	136.68	169.412	166.32	241.45	251.71		2.79034	1.12794	1.8277	1.54322	1.44186	1.24322	1.33571	1.46891
	In vivo, Trib2-reconstituted mice uniformly developed fatal transplantable acute myelogenous leukemia (AML)	TRIB2	317.663	313.753	366.957	712.789	651.652	738.116	1790.37	1738.55	2003.58	2085.69	2060.25	2098.95	1542.93	1607.46	6312.34	5862.79	1290.81	1372.15	1920.51	2011.82	413.172	412.99	416.505	428.498	2462.86	2507.51	807.662	754.911	512.477	559.345	412.159	408.563	12.1008	17.82	21.2263	23.3829		2.10598	1.12876	3.86464	1.47668	1.02281	0.314378	0.765726	-
	Supress DC differentiation/maturation	VEGFB	774.076	955.102	1145.73	3383.21	3063.74	3274.86	1600.87	1766.12	1809.91	1980.3	2004.95	1878.57	1128.79	1257.51	4756.97	3759.27	492.457	540.39	907.222	930.277	1419.38	1618.64	1736.12	1790.15	1203.92	1284.96	1975.44	1944.38	516.862	589.864	953.281	745.461	772.253	788.039	878.24	638.217		3.38161	1.13269	3.56879	1.77906	1.16071	1.57493	1.53492	0.971906
	apoptosis	CASP3	523.597	562.251	527.696	995.061	1077.66	1058.39	725.483	700.934	691.78	833.907	816.457	819.386	242.633	231.73	361.487	304.674	585.737	552.59	719.717	684.472	787.288	849.999	856.647	896.451	578.179	632.729	728.887	693.265	725.142	681.979	757.57	746.2	567.639	525.689	664.65	701.488		1.94052	1.16597	1.40433	1.23356	1.07073	1.17445	1.06869	1.24952
	toll-like receptor 3	TLR3	27.0196	35.5938	29.9048	219.32	208.14	222.707	67.1744	83.4445	79.4189	105.394	101.554	72.8127	6.61726	7.32329	22.4708	16.5478	12.5068	15.7883	34.0919	33.0891	12.3335	18.5962	15.4865	24.774	11.1906	6.24147	11.2536	19.2012	3.83673	2.77453	7.77659	12.5598	16.5011	12.87	26.5329	49.5168		7.02744	1.21615	-	-	-	-	-	-
	adhesion, EMT etc	CD44	11738.9	13395.8	13607.3	14284.2	13499.9	14058.1	17756	21512	17993.9	24574.4	23321.3	22100.1	10308.6	11115.7	42201.1	36223.2	5815.68	6473.92	10249.3	10202.8	450.173	494.348	467.04	440.426	10986.3	11776.1	6785.05	6813.4	1218.98	1348.42	758.218	713.692	6093.32	6022.16	4466.82	4085.14		1.08002	1.22238	3.66053	1.66418	0.960769	0.597408	0.573307	0.70587
	IFNr receptor; upstream of STATs	JAK2	147.513	155.558	136.441	420.363	478.527	413.599	76.3667	71.8348	58.5192	85.0548	91.4995	78.6377	81.0615	106.188	220.8	182.026	217.827	274.142	223.491	220.279	159.308	186.736	198.879	274.349	140.815	150.576	212.953	225.362	115.65	162.587	169.141	161.061	165.011	180.18	196.344	188.439		2.98624	1.23448	2.15128	0.902028	1.36754	1.50422	1.18676	1.11469
	MAPK	VIM	51041.5	51098.9	54864.8	93513.4	88630.5	92960.1	46614.8	49677.8	46855	61336.6	61260.4	57089.1	33156.9	34369.8	54066.7	50418.2	63563.4	64012.2	92152.2	97780.2	16474.5	15551	16158.1	16572	65733.3	65278.8	75566.2	77137.4	4532.82	4742.22	3060.09	3047.6	24804.5	25390.5	48244.8	45389		1.7522	1.25525	1.54731	1.48878	1.022	1.16557	0.658508	1.8654
	major histocompatibility complex, class II, DQ beta 1	HLA-DQB1	4.38156	3.95487	4.98414	12.1844	13.6166	16.9682	1916.24	1826.35	1797.37	2864.13	2559.98	2297.97	19.3004	15.6928	21.4938	28.2286	63.5764	68.8943	83.3357	74.6869	4.11117	3.8742	4.07539	6.42288	2.79764	4.6811	6.05963	8.08472	18.0874	11.0981	18.1454	18.4703	4.4003	10.89	11.9398	5.50187		-	1.39389	-	1.19289	-	-	-	-
	EGFR liagnd	HB-EGF	132.177	90.3029	97.8138	107.629	81.6997	78.4778	49.4969	69.658	36.9228	74.8852	66.3623	78.6377	33.6378	36.0934	27.3557	51.5902	76.0833	62.4355	129.738	128.575	58.5841	45.7155	34.2333	38.5373	23.3137	32.7677	64.0589	96.0061	17.5393	20.5315	20.7376	33.9853	8.8006	20.79	26.5329	48.1413		0.836128	1.40882	-	1.86483	0.697707	2.85416	-	-
	golgi autoantigen, golgin subfamily a, 7	GOLGA7	465.906	512.156	517.728	1299.67	1180.75	1300.19	1062.77	1158.06	1124.4	1584.61	1532.37	1603.82	279.028	300.778	481.657	470.152	916.126	966.674	1593.79	1547.63	792.427	853.098	968.312	982.701	890.582	922.958	1063.03	1047.98	704.314	748.567	964.297	943.462	1205.68	1249.38	1549.52	1522.64		2.5275	1.4112	1.6416	1.66848	1.18565	1.16403	1.31309	1.25136
	ring finger 144B	RNF144B	8.03286	10.5463	13.0834	24.3688	40.8498	36.0574	31.8194	47.8899	28.5629	45.301	58.3184	50.4835	254.213	245.853	629.182	510.062	65.6609	81.812	78.6007	67.1236	4.11117	6.97356	8.96585	11.9282	15.8533	14.8235	15.5819	8.08472	83.3118	83.7907	547.602	469.145	17.6012	14.85	29.1862	16.5056		-	1.42329	2.27818	0.988143	-	-	6.08457	-
	toll-like receptor 4	TLR4	529.439	508.201	509.628	988.969	976.506	984.154	3.53549	13.7865	14.6298	18.4902	18.0988	9.70836	188.041	192.498	78.1593	86.6326	283.488	317.201	192.24	171.118	7.19454	6.97356	4.07539	5.50533	1149.83	1172.62	909.81	929.743	72.3498	78.7966	57.6764	64.2766	12.1008	12.87	14.5931	11.0037		1.90635	1.44898	0.433049	0.604902	-	0.792076	0.806854	-
	adaptor-related protein complex 2, beta 1 subunit	AP2B1	1972.43	2150.79	2236.01	5690.12	5578.92	5798.87	992.06	1078.97	1101.41	1634.53	1534.38	1498	953.989	899.719	2340.87	2096.7	1664.97	1661.36	2552.16	2771.92	1117.21	1211.85	1288.64	1342.38	1873.49	1988.69	2224.75	2271.81	2002.22	2029.84	2128.19	1967.46	4356.3	4463.9	5228.31	4848.52		2.68396	1.47108	2.39389	1.60059	1.12965	1.16426	1.01577	1.14247
	transcription factor	FOXL1	22.6381	19.1152	26.1667	73.1065	66.1378	78.4778	20.5059	29.0242	30.6529	48.0745	36.1976	35.9209	2.20575	2.61546	7.81593	8.7606	7.29565	8.61179	16.0989	16.0719	15.4169	26.3445	28.5277	36.7022	660.243	703.726	408.592	385.035	1.09621	6.10396	1.94415	10.3434	45.1031	58.4099	76.9455	96.2827		3.20557	1.49899	-	-	-	0.581851	-	1.67349
	transmemebrane protein	TMEM56	113.921	111.396	120.865	844.787	844.23	803.867	65.7602	56.5971	59.9125	89.6774	103.565	89.3169	133.448	133.912	71.3203	57.4306	263.686	272.707	397.738	396.124	542.674	487.374	537.136	541.357	405.658	359.665	1095.93	1118.72	134.286	135.397	468.54	462.496	562.138	549.449	1253.68	1275.06		7.20109	1.55023	0.481565	1.48	1.04703	2.89375	3.45234	2.27489
	Immuno-suppression; many functions such as suppress DC maturation/function and NK function	TGFBI	3648.38	3744.6	3956.78	33411.7	31440.8	29497.1	33621.1	35020.6	31911.1	54011.7	53986.7	50304.8	835.43	910.704	489.473	477.94	6080.41	6077.77	21905.9	22782.3	1597.19	1567.5	846.051	885.44	20771.5	20311.3	50359	52858.9	16534.7	17174.3	37968.6	36421.9	19127	19840.6	66719.7	60781.9		8.3129	1.57433	0.554031	3.67557	0.547128	2.51243	2.20685	3.27199
	MAPK	ERBB3	116.111	128.533	121.488	859.002	916.204	967.186	1327.22	1268.36	1712.38	2349.18	2384.01	2077.59	1218.68	1331.27	3354.01	2621.37	2374.74	2793.09	4967	5098.56	2706.18	3142.75	3706.16	3734.45	12.1231	14.0433	22.5072	16.1694	326.67	327.394	667.491	585.139	81.4055	94.0499	120.725	129.294		7.49015	1.58098	2.34333	1.94773	1.27213	-	1.91515	1.42497
	major histocompatibility complex, class II, DM beta	HLA-DMB	24.0986	39.5487	29.9048	282.272	229.537	256.644	1199.95	1187.81	1499.9	2191.09	2260.34	1831	39.1521	51.7861	92.8142	67.1646	115.167	170.083	170.459	192.862	9.25012	9.29808	9.78093	8.25799	2.79764	4.6811	5.19397	3.03177	4.38483	3.32943	11.6649	16.9927	250.817	257.4	126.031	123.792		8.21417	1.61599	1.7592	1.2737	-	-	-	0.491569
	HVEM, B cell,tumor necrosis factor receptor superfamily, member 14	TNFRSF14	24.8288	29.6615	39.2501	239.627	247.044	235.433	204.352	248.882	232.683	374.426	422.305	351.443	947.923	1004.86	3452.69	3073.03	263.686	302.13	236.749	235.405	19.528	30.2187	33.4182	30.2793	58.7504	70.9967	123.79	119.25	23.0204	24.4158	40.1791	40.6346	20.9014	11.88	15.9198	17.8811		7.70323	1.67393	3.34175	0.834466	-	1.87318	-	-
	TGFb signaling,SMAD family member 3	SMAD3	1238.52	1342.02	1238.56	2146.49	2124.19	2167.68	2300.9	2212.37	2073.95	3620.38	3768.57	3777.52	373.324	363.549	1189	1166.13	864.535	910.697	1393.98	1274.4	32.8893	29.4439	26.8976	22.0213	1562.95	1437.88	2063.74	2084.85	1778.6	1896.11	1763.99	1722.17	2909.7	3049.2	4010.45	3953.09		1.68583	1.69517	3.19612	1.50312	-	1.38248	0.94869	1.33641
	tumor suppressor	TP53	569.603	565.547	559.47	3360.87	3231.03	3480.6	929.835	840.975	937.7	1635.46	1543.43	1485.38	577.356	563.37	2347.71	2193.07	396.571	414.084	893.965	888.679	1410.13	1428.8	1576.36	1603.89	115.636	105.325	214.684	201.108	3.28863	12.2079	6.48049	8.86574	2504.87	2602.71	4210.78	3975.1		5.94381	1.72208	3.9806	2.19902	1.12023	1.88175	-	1.60269
	cyclin-dependent kinase inhibitor 1A (p21, Cip1)	CDKN1A	1353.9	1709.82	1675.29	12086.9	11379.6	11489.6	2056.24	2289.28	2418.79	4337.8	4227.08	3622.19	1569.39	1712.6	1513.36	1283.92	163.631	182.283	214.968	175.845	113.057	119.325	125.522	111.024	158.533	202.848	489.964	480.031	246.647	278.562	703.134	537.855	814.055	851.399	1865.27	1497.88		7.37623	1.80167	0.852308	1.1298	1.01792	2.68414	2.36285	2.01936
	EGFR liagnd	EGF	3.6513	7.2506	16.1985	83.2602	71.9735	91.2039	105.358	131.334	114.252	227.429	245.339	193.196	12.6831	14.6466	51.7805	48.67	101.618	119.13	342.813	324.273	14.3891	6.97356	5.70554	0.917555	10.258	10.9226	12.1193	18.1906	34.5306	50.4964	50.5479	52.4556	18.7013	20.79	25.2063	20.632		9.09352	1.89764	-	3.02194	-	-	-	-
	MAPK	ERBB2	361.479	357.257	372.565	2126.18	1993.86	2191.02	1102.37	1033.26	1028.27	2062.58	2015	1962.06	275.719	285.085	1080.55	965.613	196.462	197.354	623.124	640.038	1346.41	1369.92	1371.78	1481.85	231.272	217.671	524.591	493.168	456.023	484.987	2054.96	1798.27	803.055	771.209	1374.41	1317.7		5.78306	1.90893	3.64862	3.2075	1.05055	2.26701	4.09478	1.71007
	interleukin 6 receptor	IL6R	73.026	77.12	71.024	219.32	247.044	258.765	67.8815	80.5421	87.0821	178.43	134.736	142.713	1004.72	955.166	1932.49	1742.39	107.35	137.789	206.445	199.48	29.806	45.7155	45.6444	44.9602	19.5835	10.1424	16.4476	17.18	25.2128	28.3002	43.4193	34.7241	75.9052	88.1099	90.212	88.0299		3.2786	1.93574	1.87504	1.6559	1.19972	-	-	1.08674
	toll-like receptor 1	TLR1	12.4144	17.7969	13.7064	156.367	149.783	182.408	60.1034	47.8899	49.4626	123.884	105.576	77.6669	16.5432	16.739	105.515	93.4464	167.8	167.212	359.859	352.635	12.3335	13.1723	12.2262	8.25799	22.3811	19.5046	28.5668	24.2542	12.6064	19.4217	82.9503	62.799	79.2054	68.3099	140.625	126.543		11.1244	1.95056	5.97803	2.12677	-	-	4.55067	1.81112
	zinc finger protein 285A	ZNF285A	22.6381	27.6841	21.8056	69.0451	83.6449	72.1147	41.0117	48.6155	41.7994	91.5264	88.483	76.6961	31.9834	30.3393	82.0672	77.872	27.6193	33.0119	46.4028	53.888	35.9727	52.6891	63.5761	44.9602	63.4132	67.876	96.9541	105.101	31.79	36.0688	44.7154	69.4483	77.0052	63.3599	87.5587	90.7808		3.11676	1.95322	2.5663	-	1.22416	1.53901	1.68237	1.27054
	monocyte/macrophage	CD68	1514.56	1601.72	1707.07	10860.4	10430.3	10759.9	1334.3	1574.56	1283.24	2767.98	2753.03	2669.8	2215.68	2208.5	2781.49	2564.91	669.637	692.532	1376.93	1316.95	30.8337	30.2187	18.7468	37.6197	718.993	736.494	474.382	438.596	196.769	198.101	170.437	177.315	454.331	431.639	925.999	861.042		6.64489	1.95387	1.20845	1.97764	0.923247	0.627267	0.880673	2.01704
	major histocompatibility complex, class II, DR beta 3	HLA-DRB3	194.979	218.836	205.596	1220.47	1223.55	1223.83	18658.9	20748.7	21909.2	42355.5	43059.1	36494.7	137.86	157.974	632.113	575.28	529.977	564.072	964.989	889.624	9.25012	14.722	7.3357	13.7633	29.8415	25.7461	27.7012	36.3813	8.22156	10.5432	34.3466	22.9032	23.1016	20.79	33.1662	38.5131		5.92151	1.98819	4.08133	1.69518	-	-	-	-
	major histocompatibility complex, class II, DO beta	HLA-DOB	8.03286	13.1829	9.34526	40.6147	35.0141	36.0574	12.0207	18.1401	20.203	33.2823	32.1756	34.9501	6.06583	6.27711	16.6088	14.601	4.16895	13.6353	17.0459	10.3994	5.13896	5.42388	2.44523	10.0931	11.1906	10.9226	23.3729	22.233	9.31777	12.2079	15.5532	22.9032	6.60045	8.90999	19.8997	27.5093		-	1.99365	-	-	-	-	-	-
	major histocompatibility complex, class II, DR beta 1	HLA-DRB1	21.1775	29.0024	19.9366	123.875	128.385	144.229	11166.5	11426.8	11898.2	24166.7	24441.4	21085.6	53.4896	67.4789	235.455	189.813	362.698	414.084	644.904	652.328	7.19454	8.52324	13.0412	6.42288	6.52782	7.80184	6.92529	12.1271	5.48104	8.87849	5.83244	13.2986	13.2009	24.75	21.2263	17.8811		5.65473	2.0206	3.51553	1.67001	-	-	-	-
	MAPK	MET	1936.65	1924.05	1998.64	1261.09	1206.04	1196.26	593.963	560.892	567.775	1224.05	1174.41	1153.35	104.773	103.572	118.216	138.223	638.891	613.59	978.247	973.765	1304.27	1232	1001.73	1013.9	927.884	855.082	1054.38	1034.84	1250.23	1326.78	1442.56	1458.41	2188.05	2187.9	2971.69	3004.02		0.625222	2.06186	1.23083	1.55852	0.794724	1.17177	1.12571	1.36558
	Immune cell subset marker, NK-activated	CD107a	3211.68	3250.25	3180.51	10866.5	10210.5	10745.1	7911.02	8123.14	7912.63	16533.9	16730.3	16709.1	2542.13	2610.23	5764.25	5890.05	3661.9	3587.53	6432.95	6394.71	6137.97	5853.14	7577.78	7759.76	4744.8	4691.25	6611.92	6814.41	3028.82	3165.18	5194.12	5057.17	3092.31	3054.15	4201.49	4338.22		3.30021	2.08685	2.26193	1.76947	1.27908	1.42288	1.65503	1.38937
	gamma-aminobutyric acid (GABA) B receptor, 1 ; ubiquitin D	GABBR1	163.578	155.558	146.409	527.992	737.242	547.224	190.21	193.736	146.298	316.182	379.069	423.285	129.588	140.712	713.203	595.721	225.644	249.024	585.244	627.748	228.17	235.551	271.421	276.184	153.87	151.356	219.012	216.266	43.3002	68.2534	118.593	103.434	96.8066	95.0399	176.444	156.803		3.89319	2.10947	4.84249	2.55545	1.18089	1.42609	1.99031	1.73705
	histone linker H1 domain, spermatid-specific 1	HILS1	16.0657	11.8646	14.3294	60.9221	66.1378	95.446	60.1034	57.3227	52.9459	123.884	110.604	131.063	141.168	156.928	461.14	425.376	182.912	188.024	91.8586	101.158	487.173	529.215	532.246	506.49	5.59528	4.6811	8.65661	12.1271	3.83673	6.65886	4.53635	7.38812	7.70052	9.89999	7.95988	20.632		5.2652	2.1456	2.97393	0.52035	1.02199	-	-	-
	major histocompatibility complex, class II, DP beta 1	HLA-DPB1	514.103	521.384	531.434	1206.26	1141.85	1170.8	5062.12	4440.7	5050.06	10446	10490.3	10339.4	227.193	218.129	381.027	342.637	305.896	302.13	458.346	412.196	283.67	326.982	300.764	333.072	13.0556	10.9226	19.9102	13.1377	2.74052	8.32358	6.48049	14.7762	24.2016	13.86	17.2464	22.0075		2.24575	2.14911	1.62503	1.43175	1.03796	-	-	-
	major histocompatibility complex, class II, DQ alpha 1	HLA-DQA1	3.6513	6.59145	4.98414	16.2459	5.83569	8.48409	7432.32	8052.76	7073.85	16082.8	16508.1	16712	5.51439	5.75401	15.6319	12.6542	18.2391	21.5295	40.7208	24.5805	3.08337	2.32452	0.815078	3.67022	0.932546	4.6811	5.19397	9.09532	1.64431	4.99415	3.8883	6.6493	7.70052	8.90999	6.63323	11.0037		-	2.18551	-	-	-	-	-	-
	microtubule-associated protein 1B	MAP1B	2213.42	2355.13	2361.86	4471.68	4617.98	4339.61	6028.72	6653.07	5651.98	13640.2	13234.2	13526.7	1719.94	1712.08	2020.42	2038.3	453.894	465.754	1734.9	1699.84	3630.16	3644.85	4384.3	4267.55	1149.83	1212.41	2345.08	2360.74	314.612	330.724	318.192	305.868	5171.45	5235.11	9594.31	8864.88		1.93773	2.20365	1.1826	3.73483	1.18926	1.9921	0.967032	1.7738
	TWEAK, cytokine-angiogenesis	TNFSF12	12.4144	19.1152	18.6905	203.074	210.085	190.892	241.121	243.803	250.796	533.442	610.332	529.106	83.8187	90.495	238.386	200.52	39.0839	48.8002	89.9646	82.2501	236.392	243.3	272.236	286.277	122.164	137.312	176.595	167.758	53.1661	73.2475	107.576	76.0976	258.518	256.41	405.954	411.265		12.028	2.2738	2.51791	1.95957	1.16432	1.32711	1.45296	1.58706
	Rho GTPase activating protein 15	ARHGAP15	6.57234	5.27316	4.36112	32.4918	17.5071	38.1784	19.0917	24.6705	25.0796	71.1872	63.3458	50.4835	16.5432	17.7851	66.4354	53.537	38.0416	51.6708	94.6996	103.994	9.25012	10.8478	13.8563	11.0107	6.52782	4.6811	6.05963	13.1377	5.48104	11.653	12.3129	13.2986	14.301	13.86	13.2665	22.0075		-	2.68756	3.49486	2.21479	-	-	-	-
	It makes up half of the α4β1 lymphocyte homing receptor.integrin, alpha 4 (antigen CD49D, alpha 4 subunit of VLA-4 receptor)	ITGA4	296.486	272.227	279.112	887.432	840.34	926.887	1395.11	1262.55	1421.18	4598.51	4562.91	4270.71	4.41151	1.56928	6.83894	4.867	323.093	317.919	511.378	515.245	158.28	158.067	151.604	133.045	7.46037	7.80184	6.05963	8.08472	5.48104	5.54905	3.8883	14.7762	11.0007	8.90999	13.2665	19.2565		3.13114	3.29313	-	1.60157	0.899802	-	-	-
	HLA-II	HLA-DOA	5.11182	3.29573	6.85319	75.1373	71.9735	74.2358	172.532	159.633	225.717	647.156	703.842	539.785	4.96295	1.56928	6.83894	11.6808	13.5491	19.3765	22.7279	27.4167	4.11117	1.54968	3.26031	3.67022	5.59528	3.12074	5.19397	13.1377	6.02915	4.99415	1.94415	11.821	6.60045	5.93999	7.95988	22.0075		14.5043	3.38922	-	-	-	-	-	-
	many functions such as suppress DC maturation/function and NK function, transforming growth factor, beta 1	TGFB1	1339.3	1769.15	1702.08	7320.81	6549.59	7111.79	472.342	412.143	554.539	2201.26	2096.44	1965.94	226.641	246.9	863.66	746.598	355.403	402.601	1125.98	1097.61	1969.25	2102.91	2274.07	2331.51	4578.8	5069.64	8001.31	8091.8	318.449	350.7	458.819	371.622	3399.23	3371.94	3235.69	2757.81		4.36172	4.3527	3.40046	2.93348	1.13099	1.66795	1.24104	0.88515
	SLIT and NTRK-like family, member 6	SLITRK6	257.782	223.45	242.354	727.004	676.94	786.899	684.472	696.58	671.577	3474.31	3400.56	3060.08	35.8435	37.1395	389.819	399.094	116.73	112.671	1000.98	1000.24	3.08337	3.8742	12.2262	4.58777	566.988	539.107	534.113	529.549	195.673	189.778	214.504	225.338	16.5011	15.84	11.9398	12.3792		3.02776	4.84011	10.8095	8.72362	2.41664	0.961637	1.14111	0.751954
	thymocyte selection-associated high mobility group box	TOX	5.84208	12.5238	11.2143	150.275	163.399	207.86	10.6065	17.4145	11.1465	59.1686	81.4446	76.6961	8.27158	5.75401	79.1363	72.0316	1.04224	7.89414	9.46996	8.50863	2543.78	2488.01	2256.95	2319.58	234.069	247.318	320.295	367.855	36.723	31.0747	71.9335	73.1423	6.60045	6.92999	5.30659	15.1301		17.6312	5.5482	10.778	-	0.909522	1.42951	2.13983	-
	chemokine (C-X-C motif) ligand 12	CXCL12	5.84208	5.27316	4.98414	24.3688	17.5071	21.2102	28.9911	34.1034	27.1696	308.786	291.592	284.455	7.1687	5.75401	7.81593	11.6808	5.7323	6.45884	14.2049	10.3994	1816.11	2209.84	2822.61	2627.88	8.39292	8.58202	5.19397	5.05295	7.67346	6.65886	6.48049	11.0822	12.1008	17.82	22.553	17.8811		-	9.80272	-	-	1.35384	-	-	-
	A2aR is required for the secretion of IL-4 and IL-10 by iNKT cells	A2aR	16.0657	19.7744	14.9524	75.1373	79.7544	63.6307	10.6065	21.7681	14.6298	27.7353	17.0933	24.2709	4.41151	7.84638	26.3788	30.1754	15.1124	30.1413	54.9258	44.434	14.3891	12.3974	4.89047	11.0107	16.7858	12.4829	39.8204	22.233	10.9621	11.653	26.57	36.2018	57.2039	26.73	42.4527	59.1451		4.30226	-	-	-	-	-	-	-
	TH17, zipper transcription factor, ATF-like	BATF	0.73026	3.95487	2.49207	6.09221	9.72615	16.9682	6.36389	7.98165	4.17994	1.84902	2.01098	1.94167	1.65432	2.09237	2.93097	3.8936	10.4224	20.8118	17.0459	6.61782	4.11117	0.77484	7.3357	2.75266	1.86509	1.56037	7.79095	3.03177	7.12535	14.9824	20.0895	19.9479	7.70052	4.94999	3.97994	12.3792		-	-	-	-	-	-	-	-
	complement component 8, alpha polypeptide	C8A	3.6513	10.5463	8.09923	26.3996	23.3428	31.8153	9.89938	9.43286	16.7198	12.9431	11.0604	5.82502	3.30863	5.23092	9.76991	7.7872	4.69006	16.5059	21.7809	14.181	13.3613	10.8478	13.8563	25.6915	7.46037	7.02166	13.8506	15.1589	2.74052	6.10396	5.18439	15.515	8.8006	9.89999	13.2665	19.2565		-	-	-	-	-	-	-	-
	complement component 8, beta polypeptide	C8B	2.92104	2.63658	13.7064	22.3381	13.6166	33.9364	7.77809	10.8841	11.8432	12.9431	11.0604	3.88334	3.30863	3.13855	9.76991	8.7606	5.21118	11.4824	24.6219	14.181	8.22233	6.97356	13.8563	4.58777	6.52782	5.46129	6.05963	2.02118	2.74052	9.9883	8.42464	13.2986	14.301	16.83	9.28653	12.3792		-	-	-	-	-	-	-	-
	complement component 8, gamma polypeptide	C8G	7.3026	10.5463	9.34526	28.4303	13.6166	36.0574	14.142	13.7865	6.26991	14.7921	16.0878	9.70836	7.72014	6.8002	9.76991	11.6808	15.6335	21.5295	42.6148	26.4713	14.3891	9.29808	13.0412	8.25799	22.3811	29.647	29.4325	35.3707	6.57725	7.21377	11.0168	6.6493	34.1023	18.81	37.1461	26.1339		-	-	-	-	-	-	-	-
	Attract Treg through interacting with CCR4	CCL22	13.8749	19.7744	11.2143	30.4611	33.0689	40.2994	12.7278	21.0425	18.1131	13.8676	11.0604	10.6792	8.27158	6.8002	7.81593	11.6808	7.81677	14.353	18.9399	12.2902	13.3613	6.97356	7.3357	11.0107	15.8533	11.7028	14.7162	13.1377	16.9912	17.2021	8.42464	13.2986	13.2009	9.89999	21.2263	19.2565		-	-	-	-	-	-	-	-
	chemokine (C-C motif) ligand 24	CCL24	8.03286	9.88718	6.85319	16.2459	15.5618	36.0574	4.94969	10.1585	14.6298	21.2637	8.04391	5.82502	8.82302	10.9849	9.76991	10.7074	7.29565	14.353	18.9399	13.2356	10.2779	6.97356	14.6714	14.6809	17.7184	16.3839	23.3729	25.2648	15.895	28.8551	7.77659	25.8584	28.6019	14.85	26.5329	34.3867		-	-	-	-	-	-	-	-
	chemokine (C-C motif) ligand 3	CCL3	8.03286	11.8646	9.34526	18.2766	36.9594	27.5733	8.48519	15.9633	20.203	12.0186	11.0604	2.91251	6.61726	7.32329	13.6779	13.6276	3.64783	8.61179	16.0989	12.2902	8.22233	9.29808	3.26031	3.67022	9.32546	3.12074	12.9849	6.06354	4.93294	8.87849	6.48049	11.821	14.301	13.86	7.95988	11.0037		-	-	-	-	-	-	-	-
	chemokine (C-C motif) ligand 4	CCL4	3.6513	3.29573	4.98414	16.2459	13.6166	31.8153	6.36389	7.25604	10.4498	16.6412	7.03842	8.73753	6.06583	4.18474	10.7469	11.6808	1.04224	10.7647	11.364	4.72702	5.13896	3.09936	4.07539	6.42288	3.73019	5.46129	8.65661	6.06354	2.74052	8.32358	6.48049	10.3434	12.1008	5.93999	14.5931	19.2565		-	-	-	-	-	-	-	-
	Attract T cells	CCL5	3.6513	5.93231	3.73811	40.6147	21.3975	19.0892	7.77809	7.25604	5.57325	7.39607	3.01647	6.79585	1.65432	3.66165	5.86195	1.9468	170.406	176.542	216.862	249.586	1.02779	1.54968	2.44523	5.50533	7.46037	6.24147	7.79095	7.07413	6.02915	12.7628	9.07269	19.9479	1.10007	2.97	19.8997	11.0037		-	-	-	1.34444	-	-	-	-
	chemokine (C-C motif) ligand 8	CCL8	4.38156	1.97744	1.86905	14.2152	9.72615	14.8472	2.8284	5.07923	2.08997	7.39607	6.03293	2.91251	2.20575	2.61546	2.93097	3.8936	2.08447	4.3059	10.417	3.78161	2.05558	3.8742	2.44523	5.50533	0.932546	3.12074	3.46265	6.06354	1.09621	3.88434	2.5922	5.17168	4.4003	3.96	7.95988	8.2528		-	-	-	-	-	-	-	-
	chemokine (C-C motif) receptor 2	CCR2	1.46052	3.95487	2.49207	8.12295	9.72615	23.3312	4.94969	7.25604	6.96657	7.39607	5.02745	2.91251	0.551439	3.66165	10.7469	4.867	2.08447	5.02355	5.68198	4.72702	7.19454	6.19872	6.52062	4.58777	7.46037	1.56037	6.92529	7.07413	3.28863	3.88434	3.24025	6.6493	8.8006	3.96	7.95988	17.8811		-	-	-	-	-	-	-	-
	chemokine (C-C motif) receptor 7	CCR7	6.57234	8.56889	4.36112	10.1537	7.78092	10.6051	8.48519	5.80483	9.05654	8.32058	5.02745	2.91251	2.75719	4.18474	20.5168	15.5744	3.64783	8.61179	6.62897	5.67242	1.02779	4.64904	0.815078	3.67022	4.66273	4.6811	8.65661	12.1271	1.64431	2.21962	2.5922	5.17168	19.8013	15.84	25.2063	16.5056		-	-	-	-	-	-	-	-
	CD14 molecule	CD14	2.92104	7.2506	4.98414	10.1537	17.5071	19.0892	45.9614	40.6338	64.0924	30.5088	29.1592	18.4459	2.20575	3.66165	4.88496	7.7872	156.335	183.001	401.526	409.36	7.19454	6.19872	7.3357	4.58777	23.3137	23.4055	12.9849	18.1906	11.5102	13.8726	11.6649	16.9927	79.2054	66.3299	50.4126	59.1451		-	-	-	2.38963	-	-	-	0.752791
	CD160 molecule	CD160	4.38156	5.27316	11.2143	20.3074	11.6714	25.4523	12.7278	10.8841	13.9331	20.3392	7.03842	4.85418	6.61726	7.32329	3.90796	8.7606	11.9857	17.9412	40.7208	18.9081	3.08337	6.19872	7.3357	4.58777	10.258	7.02166	9.52228	14.1483	2.19242	4.99415	5.83244	8.86574	14.301	12.87	22.553	19.2565		-	-	-	-	-	-	-	-
	CD244 molecule, natural killer cell receptor 2B4	CD244	3.6513	5.93231	1.86905	24.3688	11.6714	21.2102	3.53549	7.25604	5.57325	2.77353	1.00549	1.94167	4.41151	5.75401	2.93097	9.734	4.69006	11.4824	8.52297	7.56323	9.25012	7.7484	4.89047	4.58777	5.59528	3.12074	3.46265	6.06354	1.09621	5.54905	5.83244	8.86574	7.70052	7.91999	5.30659	9.62827		-	-	-	-	-	-	-	-
	CD27 molecule	CD27	5.11182	7.90974	6.85319	20.3074	11.6714	10.6051	14.142	15.2377	10.4498	17.5657	15.0823	8.73753	7.72014	3.66165	1.95398	13.6276	5.7323	4.3059	14.2049	10.3994	7.19454	3.09936	9.78093	12.8458	11.1906	10.9226	13.8506	13.1377	6.02915	3.32943	5.18439	9.60455	8.8006	14.85	17.2464	13.7547		-	-	-	-	-	-	-	-
	CD28 molecule	CD28	5.11182	6.59145	8.09923	32.4918	21.3975	14.8472	3.53549	10.1585	7.66322	7.39607	8.04391	2.91251	4.41151	2.61546	10.7469	3.8936	4.69006	10.7647	15.1519	12.2902	8.22233	6.19872	11.4111	8.25799	10.258	3.12074	8.65661	9.09532	3.83673	5.54905	6.48049	10.3434	7.70052	14.85	15.9198	15.1301		-	-	-	-	-	-	-	-
	expressed in CD4+, CD8+, B, NK cells. CD38 also functions in cell adhesion, signal transduction and calcium signaling.The CD38 protein is a marker of cell activation, prognosis marker of leukemia	CD38	4.38156	7.90974	3.11509	38.584	31.1237	33.9364	11.3136	14.5121	16.0231	21.2637	16.0878	20.3876	7.1687	5.75401	9.76991	12.6542	4.16895	12.2	19.8869	17.9627	6.16675	7.7484	4.89047	8.25799	9.32546	10.9226	15.5819	11.1165	10.414	12.7628	16.2012	21.4255	365.225	372.24	916.713	876.172		-	-	-	-	-	-	-	2.43115
	CD3d molecule, delta (CD3-TCR complex)	CD3D	12.4144	9.22803	11.8373	24.3688	19.4523	16.9682	6.36389	5.80483	6.26991	11.0941	8.04391	3.88334	3.86007	5.23092	8.79292	8.7606	4.69006	14.353	15.1519	13.2356	6.16675	4.64904	12.2262	5.50533	3.73019	9.36221	8.65661	6.06354	4.93294	7.76867	3.8883	9.60455	12.1008	14.85	15.9198	20.632		-	-	-	-	-	-	-	-
	CD3e molecule, epsilon (CD3-TCR complex)	CD3E	5.11182	9.88718	11.2143	24.3688	31.1237	29.6943	9.89938	16.6889	8.35988	17.5657	8.04391	5.82502	8.82302	4.70783	8.79292	13.6276	6.25342	16.5059	23.6749	11.3448	7.19454	10.0729	8.15078	8.25799	7.46037	11.7028	10.3879	11.1165	3.28863	4.99415	10.3688	7.38812	17.6012	18.81	14.5931	20.632		-	-	-	-	-	-	-	-
	CD4 molecule	CD4	4.38156	7.90974	6.23018	28.4303	33.0689	31.8153	6.36389	5.80483	8.35988	11.0941	11.0604	7.76669	4.96295	5.23092	9.76991	2.9202	3.12671	6.45884	16.0989	6.61782	13.3613	10.8478	15.4865	23.8564	2.79764	3.90092	11.2536	10.1059	3.28863	3.88434	5.83244	11.0822	11.0007	7.91999	13.2665	16.5056		-	-	-	-	-	-	-	-
	CD40 molecule, TNF receptor superfamily member 5	CD40	46.7367	61.3005	56.6946	266.027	258.716	265.128	25.4556	32.6522	36.9228	48.0745	41.225	21.3584	7.1687	10.4618	19.5398	28.2286	173.532	155.73	282.205	249.586	96.6124	123.2	98.6244	103.684	115.636	118.588	150.625	157.652	69.0611	70.473	106.28	107.128	71.5049	64.3499	100.825	101.785		4.79489	-	-	1.6151	0.920369	1.31617	1.52943	1.49137
	CD40 ligand	CD40LG	1.46052	1.97744	3.11509	14.2152	7.78092	25.4523	4.24259	8.70725	7.66322	17.5657	8.04391	2.91251	2.75719	4.70783	7.81593	12.6542	1.56335	10.0471	10.417	8.50863	7.19454	6.19872	4.07539	7.34044	5.59528	5.46129	10.3879	9.09532	2.74052	5.54905	3.24025	8.86574	13.2009	4.94999	10.6132	13.7547		-	-	-	-	-	-	-	-
	Immune cell subset marker	CD45RA	2.19078	6.59145	6.85319	30.4611	13.6166	12.7261	10.6065	12.3353	8.35988	13.8676	13.0714	10.6792	8.27158	6.8002	12.7009	15.5744	5.21118	13.6353	17.0459	18.9081	3.08337	12.3974	9.78093	9.17555	9.32546	9.36221	12.9849	8.08472	4.38483	6.65886	9.72074	10.3434	9.90067	15.84	27.8596	27.5093		-	-	-	-	-	-	-	-
	Immune cell subset marker	CD45RO	8.03286	5.93231	3.11509	20.3074	9.72615	25.4523	13.4349	10.8841	7.66322	13.8676	14.0768	7.76669	3.86007	3.66165	11.7239	15.5744	6.77454	10.7647	13.2579	8.50863	83.2511	65.0865	63.5761	68.8166	11.1906	7.02166	13.8506	11.1165	3.28863	6.65886	5.18439	11.821	9.90067	11.88	15.9198	31.6357		-	-	-	-	0.892509	-	-	-
	activated T and NK cells	CD69	2.19078	3.29573	5.60716	6.09221	1.94523	12.7261	7.07099	9.43286	10.4498	11.0941	12.0659	5.82502	2.20575	5.23092	10.7469	10.7074	0.521118	5.02355	7.57597	3.78161	7.19454	4.64904	4.89047	4.58777	4.66273	7.80184	4.32831	4.04236	1.64431	4.43924	3.24025	5.91049	5.50037	1.98	6.63323	5.50187		-	-	-	-	-	-	-	-
	CD80 molecule	CD80	4.38156	9.22803	3.11509	20.3074	23.3428	14.8472	5.65679	11.6097	19.5064	7.39607	9.0494	3.88334	4.41151	2.09237	7.81593	8.7606	5.21118	12.9177	21.7809	3.78161	8.22233	4.64904	7.3357	6.42288	6.52782	7.80184	11.2536	8.08472	5.48104	5.54905	7.12854	11.821	13.2009	12.87	13.2665	24.7584		-	-	-	-	-	-	-	-
	CD86 molecule	CD86	5.84208	6.59145	7.47621	34.5225	11.6714	23.3312	9.89938	19.5913	16.0231	18.4902	10.0549	8.73753	2.75719	4.18474	17.5858	11.6808	8.33789	11.4824	15.1519	9.45403	6.16675	3.09936	7.3357	1.83511	5.59528	7.02166	13.8506	11.1165	4.38483	9.9883	9.72074	11.821	15.401	10.89	14.5931	13.7547		-	-	-	-	-	-	-	-
	CD8a molecule	CD8A	10.9539	6.59145	7.47621	26.3996	23.3428	42.4204	9.89938	5.80483	4.17994	6.47156	15.0823	4.85418	5.51439	5.23092	4.88496	9.734	3.64783	4.3059	16.0989	5.67242	24.667	24.7949	14.6714	16.516	10.258	8.58202	15.5819	10.1059	9.86588	8.87849	12.961	22.1643	24.2016	18.81	27.8596	41.264		-	-	-	-	-	-	-	-
	CD8b molecule	CD8B	2.19078	8.56889	4.36112	14.2152	9.72615	14.8472	9.19229	14.5121	11.8432	8.32058	8.04391	3.88334	2.75719	4.70783	11.7239	7.7872	5.7323	11.4824	13.2579	2.83621	10.2779	9.29808	4.07539	8.25799	9.32546	7.02166	6.05963	13.1377	6.02915	7.76867	9.72074	11.0822	5.50037	7.91999	13.2665	2.75093		-	-	-	-	-	-	-	-
	cytokine inducible SH2-containing protein. The protein encoded by this gene contains a SH2 domain and a SOCS box domain. The protein thus belongs to the cytokine-induced STAT inhibitor (CIS), also known as suppressor of cytokine signaling (SOCS) or STAT-induced STAT inhibitor (SSI), protein family. CIS family members are known to be cytokine-inducible negative regulators of cytokine signaling. Th…	CISH	17.5262	34.9347	33.0199	62.9528	48.6308	74.2358	2.8284	6.53044	13.9331	8.32058	5.02745	0.970836	18.7489	16.2159	58.6195	37.9626	14.0702	12.9177	19.8869	12.2902	17.4725	21.6955	26.0825	23.8564	13.0556	12.4829	37.2234	44.466	37.8192	34.4041	47.3076	25.1196	37.4025	32.67	39.7994	39.8885		2.17381	-	2.76227	-	-	-	-	-
	C-type lectin domain family 5 member A or CLEC5A, also known as C-type lectin superfamily member 5 (CLECSF5) and myeloid DAP12-associating lectin 1 (MDL1) is a C-type lectin that in humans is encoded by the CLEC5A gene.It appears to be a member of a significant myeloid lineage activating pathway.	CLEC5A	5.11182	5.27316	5.60716	22.3381	17.5071	10.6051	9.19229	8.70725	6.96657	16.6412	16.0878	6.79585	3.30863	3.13855	12.7009	15.5744	7.81677	10.0471	10.417	11.3448	4.11117	13.9471	11.4111	8.25799	7.46037	13.2631	12.9849	12.1271	2.19242	4.99415	7.77659	14.7762	13.2009	9.89999	15.9198	27.5093		-	-	-	-	-	-	-	-
	complement component (3b/4b) receptor 1 (Knops blood group)	CR1	2.92104	3.29573	6.85319	8.12295	11.6714	23.3312	12.7278	15.9633	12.5398	21.2637	9.0494	17.4751	3.30863	4.18474	1.95398	8.7606	4.16895	6.45884	14.2049	8.50863	3.08337	6.97356	3.26031	6.42288	9.32546	8.58202	10.3879	10.1059	3.28863	5.54905	7.12854	18.4703	13.2009	14.85	27.8596	17.8811		-	-	-	-	-	-	-	-
	colony stimulating factor 2 (granulocyte-macrophage), GM-CSF	CSF2	35.0525	41.5262	54.8256	24.3688	23.3428	29.6943	6.36389	40.6338	5.57325	9.24509	4.02196	1.94167	1.65432	3.13855	5.86195	6.8138	6.77454	9.32944	9.46996	5.67242	4.11117	3.8742	1.63016	0.917555	29.8415	31.9875	6.05963	8.08472	48.7813	59.3749	15.5532	23.642	4.4003	2.97	7.95988	15.1301		-	-	-	-	-	-	-	-
	cytotoxic T-lymphocyte-associated protein 4	CTLA4	3.6513	2.63658	5.60716	32.4918	44.7403	25.4523	9.89938	13.7865	11.8432	8.32058	6.03293	0.970836	63.4154	75.3253	6.83894	7.7872	18.2391	11.4824	4.73498	8.50863	4.11117	3.09936	0.815078	1.83511	8.39292	4.6811	4.32831	6.06354	1.64431	4.99415	1.94415	5.17168	6.60045	8.90999	3.97994	4.1264		-	-	-	-	-	-	-	-
	Induced by IFNr, Attract T cells, NK, DC and monocytes, promote T cell adhesion	CXCL10	5.84208	6.59145	11.2143	28.4303	23.3428	29.6943	14.8491	10.8841	11.1465	17.5657	17.0933	5.82502	2.75719	4.18474	5.86195	14.601	6.77454	8.61179	17.9929	5.67242	13.3613	6.97356	7.3357	9.17555	6.52782	3.90092	7.79095	6.06354	3.83673	12.7628	22.6817	24.3808	11.0007	13.86	13.2665	17.8811		-	-	-	-	-	-	-	-
	chemotactic for polymorphonuclear leukocytes and hematopoietic stem cells	CXCL2	60.6116	61.9597	77.8772	91.3832	85.5901	99.688	12.0207	15.9633	9.05654	14.7921	14.0768	8.73753	2.20575	3.66165	8.79292	8.7606	8.33789	19.3765	27.4629	10.3994	17.4725	14.722	8.96585	12.8458	48.4924	58.5138	38.9548	45.4766	76.1865	77.1318	90.0789	104.911	332.223	306.9	409.934	376.878		1.38021	-	-	-	-	-	1.2718	1.23108
	Induced by IFNr, Attract T cells, NK, DC and monocytes, promote T cell adhesion	CXCL9 (MIG)	3.6513	2.63658	4.98414	28.4303	23.3428	23.3312	7.07099	8.70725	4.17994	15.7167	12.0659	10.6792	4.41151	4.70783	9.76991	6.8138	5.21118	11.4824	22.7279	12.2902	8.22233	7.7484	2.44523	9.17555	5.59528	7.02166	12.1193	7.07413	4.38483	8.87849	5.83244	13.2986	17.6012	5.93999	10.6132	9.62827		-	-	-	-	-	-	-	-
	chemokine receptor	CXCR6	10.2236	3.29573	8.09923	34.5225	29.1785	21.2102	7.77809	7.25604	11.1465	16.6412	10.0549	5.82502	3.86007	5.75401	7.81593	4.867	6.25342	11.4824	26.5159	14.181	15.4169	13.1723	11.4111	11.0107	7.46037	12.4829	6.92529	11.1165	17.5393	15.5373	19.4415	18.4703	17.6012	13.86	11.9398	24.7584		-	-	-	-	-	-	-	-
	Cytochrome b-245 heavy chain, generate ROS	CYBB	1.46052	3.29573	1.86905	14.2152	15.5618	10.6051	4.24259	6.53044	6.26991	5.54706	6.03293	2.91251	2.20575	3.66165	0.976991	4.867	10.9435	15.0706	24.6219	27.4167	1.02779	3.8742	5.70554	7.34044	8.39292	7.80184	9.52228	7.07413	3.28863	4.99415	7.77659	13.2986	15.401	10.89	22.553	13.7547		-	-	-	-	-	-	-	-
	Cytohesin 1-interactin protein	CYTIP	2.92104	3.95487	2.49207	14.2152	7.78092	10.6051	5.65679	6.53044	5.57325	12.9431	8.04391	5.82502	2.75719	3.66165	3.90796	6.8138	4.69006	5.7412	12.311	1.89081	3.08337	3.8742	4.89047	2.75266	13.0556	9.36221	8.65661	14.1483	3.28863	6.65886	5.18439	9.60455	8.8006	3.96	5.30659	4.1264		-	-	-	-	-	-	-	-
	DENN/MADD domain containing 2D	DENND2D	7.3026	7.90974	4.98414	42.6455	19.4523	33.9364	8.48519	4.35363	16.7198	7.39607	3.01647	6.79585	11.5802	6.8002	9.76991	15.5744	60.9708	66.7414	32.1979	32.1437	6.16675	10.8478	8.96585	3.67022	44.7622	60.8544	63.1933	56.5931	242.81	254.147	287.086	251.935	26.4018	35.64	65.0057	68.7733		-	-	-	0.503801	-	1.13416	1.08464	2.15627
	tumor suppressor, dipeptidyl-peptidase 4	DPP4	3.6513	3.29573	6.85319	215.258	184.797	193.013	4.94969	13.7865	6.26991	10.1696	6.03293	6.79585	2.75719	0.523092	0.976991	4.867	1.04224	4.3059	7.57597	2.83621	4.11117	4.64904	2.44523	2.75266	31.7066	30.4272	207.759	210.203	19.7318	18.8668	36.2908	39.8958	5.50037	7.91999	14.5931	9.62827		42.9753	-	-	-	-	6.7268	1.97382	-
	DAZ interacting protein 1	DZIP1	81.7891	94.9169	99.0598	180.736	186.742	169.682	12.7278	8.70725	10.4498	16.6412	17.0933	4.85418	2.75719	6.8002	8.79292	4.867	4.69006	10.7647	14.2049	5.67242	43.1672	45.7155	48.0896	49.548	60.6155	66.3156	76.1782	75.7943	4.38483	3.88434	4.53635	14.7762	48.4033	59.3999	80.9254	78.4016		1.94788	-	-	-	-	1.19728	-	-
	ELL associated factor 2	EAF2	52.5787	48.1176	54.2025	125.906	136.166	167.561	38.1833	52.9691	39.0128	32.3578	39.2141	25.2417	98.7075	101.48	97.6991	96.3666	63.5764	58.1296	85.2297	69.0144	67.8342	78.2588	87.2133	70.6517	73.6712	63.1949	68.3873	75.7943	31.2419	31.6296	41.4752	49.5004	106.707	107.91	102.152	103.16		2.77363	-	0.96942	1.26735	1.08058	1.05345	-	0.956642
	CD39, ectonucleoside triphosphate diphosphohydrolase 1	ENTPD1	8.03286	7.90974	6.23018	20.3074	27.2332	12.7261	12.0207	8.70725	9.05654	12.0186	8.04391	1.94167	2.20575	3.66165	2.93097	5.8404	37.5205	39.4707	51.1378	40.6523	7.19454	11.6226	5.70554	6.42288	4.66273	4.6811	6.05963	8.08472	4.93294	4.99415	4.53635	9.60455	6.60045	8.90999	10.6132	16.5056		-	-	-	-	-	-	-	-
	Eomesodermin also known as T-box brain protein 2 (TBR2)	EOMES	3.6513	7.2506	4.36112	20.3074	5.83569	27.5733	5.65679	15.2377	9.05654	18.4902	13.0714	2.91251	12.6831	9.93875	16.6088	19.468	8.33789	12.2	20.8339	25.5259	2.05558	3.8742	1.63016	2.75266	6.52782	7.02166	14.7162	12.1271	13.1545	17.2021	12.3129	21.4255	11.0007	20.79	26.5329	27.5093		-	-	-	-	-	-	-	-
	Epithelial cell adhesion molecule	EPCAM	4.38156	3.29573	6.23018	30.4611	36.9594	23.3312	5.65679	5.80483	6.96657	11.0941	10.0549	3.88334	2.20575	3.13855	3.90796	3.8936	11.4646	17.9412	16.0989	13.2356	14.3891	8.52324	4.89047	6.42288	60.6155	62.4147	105.611	66.699	4600.24	4567.98	4410.62	4710.66	155.111	131.67	206.957	215.948		-	-	-	-	-	1.40055	0.994881	1.47467
	epithelial stromal interaction 1 (breast)	EPSTI1	8.76312	7.90974	11.2143	97.4754	101.152	95.446	20.5059	14.5121	14.6298	25.8863	25.1372	26.2126	6.61726	8.36948	49.8265	35.0424	17.718	24.4001	42.6148	41.5977	11.3057	10.0729	8.15078	9.17555	82.0641	70.9967	409.458	409.289	64.1282	53.2709	191.823	169.927	18.7013	7.91999	7.95988	12.3792		10.5451	-	-	-	-	5.34916	3.08136	-
	family with sequence similarity 26, member F	FAM26F	205.933	213.563	250.453	225.412	175.071	205.739	12.7278	12.3353	6.96657	16.6412	9.0494	5.82502	2.75719	4.18474	0.976991	8.7606	5.21118	5.7412	16.0989	9.45403	3.08337	5.42388	1.63016	6.42288	4.66273	6.24147	11.2536	12.1271	7.12535	4.99415	3.24025	9.60455	6.60045	9.89999	3.97994	6.87733		0.904877	-	-	-	-	-	-	-
	Exhaustion/ suppression	FASLG	10.9539	11.2055	12.4604	34.5225	23.3428	23.3312	7.77809	17.4145	11.8432	10.1696	3.01647	3.88334	12.1317	5.23092	7.81593	7.7872	7.29565	7.89414	15.1519	11.3448	7.19454	9.29808	8.96585	5.50533	4.66273	10.1424	8.65661	13.1377	7.67346	7.76867	5.18439	18.4703	26.4018	13.86	19.8997	19.2565		-	-	-	-	-	-	-	-
	Fc fragment of IgE, high affinity I, receptor for; alpha polypeptide. The high affinity IgE receptor plays a central role in allergic disease, coupling allergen and mast cell to initiate the inflammatory and immediate hypersensitivity responses that are characteristic of disorders such as hay fever and asthma	FCER1A	3.6513	2.63658	2.49207	6.09221	5.83569	10.6051	4.24259	4.35363	6.26991	12.9431	5.02745	7.76669	3.86007	4.18474	6.83894	6.8138	2.08447	3.58825	9.46996	10.3994	7.19454	3.8742	3.26031	6.42288	1.86509	7.02166	4.32831	10.1059	2.19242	3.32943	3.8883	7.38812	5.50037	5.93999	9.28653	13.7547		-	-	-	-	-	-	-	-
	CD16a, NK etc	FcrIIIA	1.46052	2.63658	5.60716	14.2152	11.6714	6.36307	8.48519	5.80483	8.35988	13.8676	11.0604	6.79585	1.10288	2.09237	4.88496	7.7872	6.25342	5.7412	12.311	3.78161	9.25012	0.77484	4.07539	5.50533	2.79764	4.6811	10.3879	12.1271	4.38483	4.99415	3.24025	7.38812	11.0007	8.90999	9.28653	17.8811		-	-	-	-	-	-	-	-
	VEGFR3	FLT4	5.84208	3.29573	3.73811	14.2152	7.78092	31.8153	9.19229	10.8841	11.1465	16.6412	7.03842	7.76669	4.41151	4.18474	3.90796	8.7606	2.08447	13.6353	17.0459	9.45403	4.11117	4.64904	11.4111	10.0931	11.1906	3.90092	6.92529	13.1377	4.93294	2.77453	6.48049	9.60455	47.3032	37.62	58.3725	53.6432		-	-	-	-	-	-	-	-
	forkhead box P3	FOXP3	4.38156	5.93231	5.60716	10.1537	21.3975	19.0892	10.6065	10.8841	16.0231	13.8676	14.0768	4.85418	3.30863	3.13855	9.76991	11.6808	5.21118	12.2	12.311	7.56323	3.08337	6.19872	5.70554	8.25799	6.52782	5.46129	10.3879	6.06354	4.38483	8.87849	8.42464	11.821	23.1016	13.86	11.9398	15.1301		-	-	-	-	-	-	-	-
	tumor antigen	GAGE	5.84208	3.95487	8.09923	20.3074	23.3428	23.3312	14.8491	21.7681	12.5398	12.0186	14.0768	13.5917	1.10288	1.04618	5.86195	5.8404	6.77454	4.3059	9.46996	10.3994	4.11117	6.97356	1.63016	7.34044	11.1906	10.9226	7.79095	7.07413	33.9825	41.063	47.3076	51.7168	4.4003	6.92999	14.5931	9.62827		-	-	-	-	-	-	-	-
	Proinflammatory stimuli induce galectin-9 in human mesenchymal stromal cells to suppress T-cell proliferation	GAL9	2.92104	6.59145	6.23018	105.598	79.7544	82.7199	26.8698	37.0058	14.6298	29.5843	31.1702	47.571	3.86007	1.56928	5.86195	8.7606	5.7323	12.2	17.0459	10.3994	4.11117	7.7484	15.4865	11.9282	6.52782	6.24147	28.5668	42.4448	106.332	102.103	150.347	149.24	25.3017	18.81	42.4527	38.5131		17.0284	-	-	-	-	-	1.43732	-
	GATA binding protein 3	GATA3	2.19078	6.59145	5.60716	18.2766	27.2332	31.8153	9.19229	7.98165	9.75319	7.39607	10.0549	4.85418	3.86007	4.70783	3.90796	6.8138	5.21118	3.58825	7.57597	4.72702	13.3613	7.7484	13.0412	11.0107	46.6273	63.1949	115.133	104.091	1.09621	4.43924	4.53635	11.821	18.7013	19.8	18.5731	9.62827		-	-	-	-	-	1.99617	-	-
	guanylate binding protein 5	GBP5	8.76312	7.2506	7.47621	24.3688	25.288	31.8153	28.284	32.6522	32.7429	64.7156	44.2415	33.9793	3.30863	9.41566	17.5858	17.5212	10.4224	15.0706	30.3039	24.5805	12.3335	6.19872	9.78093	10.0931	16.7858	16.3839	25.1042	33.3495	10.9621	9.43339	20.0895	42.1123	28.6019	24.75	67.659	63.2715		-	-	-	-	-	-	-	2.45409
	GTP cyclohydrolase 1 (dopa-responsive dystonia)	GCH1	97.1246	91.6212	89.0915	121.844	105.042	131.503	28.284	43.5363	28.5629	14.7921	14.0768	13.5917	138.411	126.065	71.3203	73.005	159.462	146.4	76.7067	80.3593	145.946	137.147	141.008	161.49	246.192	262.922	344.533	346.633	261.994	239.164	215.8	225.338	85.8058	82.1699	148.584	170.558		1.28993	-	0.545702	0.513518	1.06855	1.35758	0.880237	1.89993
	anti-inflammatory, stimulate TH2 cell differentiation and promotes tolerogeneic cell populations	G-CSF	5.11182	5.93231	11.2143	24.3688	19.4523	27.5733	4.24259	13.7865	9.75319	12.0186	10.0549	6.79585	4.96295	7.84638	10.7469	12.6542	4.69006	13.6353	19.8869	10.3994	5.13896	10.8478	10.596	5.50533	6.52782	7.80184	9.52228	11.1165	8.76967	8.32358	7.12854	17.7315	8.8006	7.91999	15.9198	15.1301		-	-	-	-	-	-	-	-
	G protein-coupled receptor 171	GPR171	5.84208	7.2506	7.47621	24.3688	9.72615	23.3312	6.36389	8.70725	12.5398	6.47156	3.01647	5.82502	2.20575	1.56928	5.86195	5.8404	5.21118	2.8706	7.57597	3.78161	7.19454	2.32452	5.70554	3.67022	10.258	8.58202	6.05963	9.09532	1.09621	6.65886	3.24025	8.86574	15.401	8.90999	11.9398	15.1301		-	-	-	-	-	-	-	-
	granzyme A (granzyme 1, cytotoxic T-lymphocyte-associated serine esterase 3)	GZMA	4.38156	9.88718	11.8373	16.2459	21.3975	16.9682	12.0207	7.98165	7.66322	6.47156	7.03842	4.85418	3.30863	4.18474	8.79292	10.7074	6.77454	8.61179	17.0459	12.2902	4.11117	8.52324	8.15078	8.25799	6.52782	7.02166	10.3879	6.06354	4.38483	2.21962	1.94415	11.821	14.301	8.90999	10.6132	27.5093		-	-	-	-	-	-	-	-
	granzyme B (granzyme 2, cytotoxic T-lymphocyte-associated serine esterase 1)	GZMB	5.11182	3.95487	8.09923	28.4303	15.5618	10.6051	7.77809	11.6097	10.4498	6.47156	8.04391	6.79585	1.65432	3.66165	6.83894	6.8138	4.69006	10.7647	19.8869	17.0173	8.22233	6.19872	8.15078	6.42288	5.59528	6.24147	12.9849	12.1271	5.48104	8.32358	1.94415	5.91049	11.0007	7.91999	11.9398	19.2565		-	-	-	-	-	-	-	-
	granzyme K (granzyme 3; tryptase II)	GZMK	4.38156	3.95487	3.73811	10.1537	23.3428	14.8472	5.65679	5.07923	6.96657	9.24509	10.0549	5.82502	1.65432	2.09237	2.93097	7.7872	4.69006	7.17649	20.8339	6.61782	5.13896	6.97356	9.78093	6.42288	6.52782	7.02166	9.52228	7.07413	3.28863	6.65886	3.8883	11.821	11.0007	10.89	14.5931	16.5056		-	-	-	-	-	-	-	-
	GF	HGF	0.73026	2.63658	5.60716	12.1844	13.6166	8.48409	7.77809	7.98165	12.5398	19.4147	11.0604	4.85418	2.20575	1.04618	6.83894	12.6542	3.12671	2.8706	10.417	3.78161	2.05558	6.19872	4.89047	3.67022	1.86509	5.46129	8.65661	12.1271	1.64431	4.99415	4.53635	10.3434	9.90067	15.84	17.2464	19.2565		-	-	-	-	-	-	-	-
	HLA-II	HLA-DQA2	3.6513	2.63658	3.11509	8.12295	11.6714	6.36307	9.19229	8.70725	11.1465	13.8676	3.01647	6.79585	2.20575	1.56928	1.95398	8.7606	1.56335	5.7412	11.364	2.83621	4.11117	5.42388	4.07539	1.83511	4.66273	6.24147	6.05963	6.06354	1.64431	3.32943	1.94415	5.17168	3.30022	5.93999	7.95988	4.1264		-	-	-	-	-	-	-	-
	HLA-II	HLA-DQB2	7.3026	5.27316	12.4604	30.4611	33.0689	33.9364	14.142	15.2377	17.4164	22.1882	14.0768	14.5625	4.41151	4.18474	4.88496	5.8404	8.33789	11.4824	23.6749	15.1265	6.16675	4.64904	4.89047	2.75266	12.1231	7.80184	11.2536	7.07413	3.83673	12.7628	8.42464	10.3434	17.6012	13.86	25.2063	30.2603		-	-	-	-	-	-	-	-
	HLA-II	HLA-DQB3	6.57234	9.88718	5.60716	22.3381	21.3975	27.5733	6.36389	5.80483	13.9331	17.5657	13.0714	5.82502	6.06583	6.27711	7.81593	7.7872	5.21118	10.7647	16.0989	14.181	9.25012	9.29808	12.2262	8.25799	7.46037	6.24147	11.2536	17.18	2.74052	6.65886	7.12854	8.12693	20.9014	7.91999	25.2063	33.0112		-	-	-	-	-	-	-	-
	HLA-II	HLA-DRB4	140.21	145.671	149.524	974.754	795.599	897.192	12.7278	18.1401	16.0231	18.4902	18.0988	16.5042	3.86007	4.70783	5.86195	5.8404	26.0559	22.9648	35.0389	49.161	5.13896	5.42388	4.07539	5.50533	8.39292	4.6811	7.79095	9.09532	3.28863	4.99415	3.8883	8.86574	5.50037	10.89	11.9398	17.8811		6.12658	-	-	-	-	-	-	-
	HLA-II	HLA-DRB5	4.38156	3.29573	2.49207	6.09221	11.6714	19.0892	8.48519	6.53044	7.66322	8.32058	6.03293	6.79585	46.8723	60.6787	115.285	161.584	4.69006	5.7412	9.46996	6.61782	8.22233	7.7484	8.96585	3.67022	2.79764	9.36221	6.05963	9.09532	3.83673	4.99415	5.83244	8.12693	6.60045	6.92999	17.2464	15.1301		-	-	2.57431	-	-	-	-	-
	HLA-I	HLA-H	11.6842	16.4786	12.4604	48.7377	60.3021	65.7517	9.19229	7.25604	6.26991	11.0941	7.03842	2.91251	1.10288	1.04618	0.976991	5.8404	1.56335	2.15295	9.46996	4.72702	20.5558	10.0729	3.26031	11.9282	4.66273	1.56037	6.05963	6.06354	10.9621	13.3177	13.609	16.9927	3.30022	5.93999	6.63323	12.3792		4.30276	-	-	-	-	-	-	-
	HLA-I	HLA-J	0.73026	7.90974	8.09923	26.3996	23.3428	23.3312	8.48519	13.0609	10.4498	14.7921	11.0604	9.70836	3.30863	4.18474	8.79292	5.8404	2.08447	11.4824	22.7279	10.3994	7.19454	5.42388	2.44523	4.58777	2.79764	9.36221	14.7162	10.1059	1.64431	11.0981	5.18439	14.0374	14.301	17.82	13.2665	26.1339		-	-	-	-	-	-	-	-
	inducible T-cell co-stimulator	ICOS	3.6513	5.27316	3.73811	12.1844	15.5618	23.3312	7.07099	5.80483	7.66322	14.7921	6.03293	4.85418	33.6378	32.9548	26.3788	27.2552	10.9435	9.32944	8.52297	4.72702	6.16675	8.52324	4.89047	2.75266	7.46037	6.24147	7.79095	11.1165	4.93294	8.32358	6.48049	11.0822	3.30022	7.91999	7.95988	16.5056		-	-	-	-	-	-	-	-
	Block T-cell proliferation	IDO	5.84208	8.56889	6.23018	14.2152	21.3975	33.9364	19.7988	46.4387	29.9562	20.3392	26.1427	18.4459	3.30863	11.508	12.7009	16.5478	8.33789	12.2	23.6749	15.1265	10.2779	9.29808	4.89047	5.50533	7.46037	11.7028	16.4476	13.1377	100.303	100.438	235.242	212.039	17.6012	11.88	14.5931	13.7547		-	-	-	-	-	-	2.22815	-
	Major Th1-type cytokine	IFNG	2.19078	5.27316	4.36112	16.2459	23.3428	25.4523	8.48519	9.43286	6.96657	9.24509	6.03293	4.85418	3.30863	3.66165	6.83894	11.6808	2.60559	10.7647	11.364	5.67242	4.11117	5.42388	10.596	7.34044	3.73019	5.46129	11.2536	8.08472	3.83673	4.99415	7.77659	2.95525	11.0007	10.89	13.2665	15.1301		-	-	-	-	-	-	-	-
	Th2-type cytokine; Anti-inflammatory, inhibits IFNr, IL-2, IL-3, TNFa and GM-CSF	IL10	6.57234	6.59145	6.23018	6.09221	23.3428	36.0574	12.0207	10.8841	9.05654	8.32058	11.0604	7.76669	5.51439	4.70783	5.86195	5.8404	5.7323	5.7412	13.2579	8.50863	7.19454	3.8742	7.3357	1.83511	6.52782	7.80184	13.8506	9.09532	3.83673	8.32358	8.42464	11.0822	9.90067	13.86	15.9198	26.1339		-	-	-	-	-	-	-	-
	Th2-type cytokine receptor	IL10RA	4.38156	9.22803	5.60716	20.3074	31.1237	19.0892	9.89938	12.3353	14.6298	11.0941	10.0549	6.79585	4.41151	4.18474	5.86195	9.734	7.29565	11.4824	19.8869	4.72702	12.3335	12.3974	8.15078	9.17555	7.46037	5.46129	6.92529	9.09532	4.93294	7.76867	7.12854	15.515	11.0007	16.83	19.8997	22.0075		-	-	-	-	-	-	-	-
	Th1-type cytokine; Major cytokine produced by myeloid DC, interleukin 12A (natural killer cell stimulatory factor 1, cytotoxic lymphocyte maturation factor 1, p35)	IL12A	54.0393	72.506	62.3018	62.9528	73.9188	84.8409	14.142	18.1401	9.75319	11.0941	15.0823	10.6792	44.6665	46.5552	13.6779	12.6542	14.5913	21.5295	20.8339	16.0719	52.4174	61.2123	51.3499	40.3724	6.52782	10.9226	14.7162	27.2859	9.31777	11.653	11.0168	12.5598	18.7013	13.86	18.5731	12.3792		1.17403	-	-	-	-	-	-	-
	Th1-type cytokine; Major cytokine produced by myeloid DC, interleukin 12B (natural killer cell stimulatory factor 2, cytotoxic lymphocyte maturation factor 2, p40)	IL12B	7.3026	15.1603	11.2143	36.5533	35.0141	48.7835	10.6065	12.3353	18.8097	13.8676	11.0604	11.65	7.1687	8.89257	6.83894	6.8138	10.4224	10.7647	21.7809	16.0719	14.3891	11.6226	12.2262	13.7633	16.7858	9.36221	12.9849	19.2012	8.76967	9.9883	9.72074	17.7315	14.301	22.77	18.5731	19.2565		-	-	-	-	-	-	-	-
	Th2-type cytokine; function similar to IL4	IL13	4.38156	6.59145	6.23018	10.1537	27.2332	16.9682	9.89938	7.25604	9.05654	11.0941	8.04391	1.94167	1.65432	3.13855	6.83894	10.7074	3.64783	7.17649	15.1519	6.61782	9.25012	10.8478	13.8563	7.34044	8.39292	8.58202	6.92529	6.06354	1.64431	6.10396	1.2961	12.5598	8.8006	10.89	18.5731	15.1301		-	-	-	-	-	-	-	-
	Promote T cell activation/differentiation; function similar to IL2	IL15	24.8288	16.4786	25.5437	109.66	103.097	106.051	38.8904	42.8107	39.7094	44.3764	40.2196	34.9501	3.30863	5.75401	4.88496	4.867	21.3658	29.4236	35.9859	29.3075	7.19454	10.0729	8.96585	9.17555	17.7184	9.36221	71.8499	51.5401	43.8483	60.4847	66.7491	74.62	200.214	208.89	282.576	265.465		4.76892	-	-	-	-	-	1.35498	1.33961
	Major Th17-type cytokine	IL17A	2.92104	6.59145	8.09923	32.4918	21.3975	42.4204	10.6065	11.6097	6.96657	12.0186	6.03293	5.82502	5.51439	4.70783	6.83894	6.8138	3.64783	12.2	19.8869	8.50863	8.22233	9.29808	5.70554	6.42288	3.73019	10.1424	6.05963	12.1271	5.48104	2.77453	10.3688	8.12693	13.2009	10.89	11.9398	11.0037		-	-	-	-	-	-	-	-
	Major Th17-type cytokine	IL17B	3.6513	9.22803	7.47621	16.2459	7.78092	16.9682	10.6065	10.1585	11.8432	9.24509	10.0549	4.85418	5.51439	2.09237	7.81593	3.8936	5.21118	7.17649	4.73498	10.3994	14.3891	6.19872	13.0412	22.0213	8.39292	7.02166	11.2536	6.06354	7.12535	3.88434	5.83244	5.17168	4.4003	10.89	5.30659	12.3792		-	-	-	-	-	-	-	-
	Major Th17-type cytokine	IL17F	8.76312	7.2506	9.34526	16.2459	13.6166	23.3312	12.7278	13.0609	12.5398	12.0186	8.04391	8.73753	5.51439	7.84638	5.86195	6.8138	5.21118	9.32944	22.7279	13.2356	9.25012	12.3974	12.2262	11.0107	13.0556	10.1424	17.3132	16.1694	3.83673	6.65886	6.48049	10.3434	16.5011	17.82	19.8997	24.7584		-	-	-	-	-	-	-	-
	interleukin 13 receptor, alpha 1	IL18R1	45.2761	51.4133	44.8573	42.6455	70.0283	67.8727	20.5059	31.9266	27.1696	15.7167	14.0768	9.70836	17.0946	13.6004	19.5398	18.4946	4.69006	13.6353	11.364	20.7989	731.788	797.31	471.115	535.852	7.46037	7.80184	10.3879	10.1059	7.12535	8.87849	6.48049	15.515	36.3025	29.7	62.3524	66.0224		-	-	-	-	0.658537	-	-	1.945
	interleukin 1 receptor, type II	IL1R2	5.84208	3.29573	6.23018	4.06147	7.78092	14.8472	6.36389	6.53044	6.96657	9.24509	7.03842	1.94167	2.75719	4.18474	7.81593	1.9468	9.38013	12.9177	27.4629	21.7443	5.13896	4.64904	4.07539	11.0107	0.932546	7.80184	6.92529	4.04236	3.28863	6.10396	3.8883	7.38812	37.4025	29.7	116.745	107.286		-	-	-	-	-	-	-	3.33864
	Necessary for T-cell activation and differentiation	IL2	5.84208	9.22803	6.85319	20.3074	15.5618	21.2102	9.89938	5.80483	5.57325	11.0941	5.02745	7.76669	5.51439	4.70783	5.86195	5.8404	4.16895	10.0471	16.0989	11.3448	9.25012	5.42388	7.3357	5.50533	13.0556	11.7028	12.1193	12.1271	3.28863	3.88434	4.53635	5.91049	6.60045	8.90999	22.553	22.0075		-	-	-	-	-	-	-	-
	Induce memory T cell differentiation	IL21	0.73026	0.659145	1.24604	6.09221	9.72615	2.12102	2.1213	6.53044	0.696657	7.39607	5.02745	4.85418	1.10288	1.04618	2.93097	4.867	1.56335	4.3059	3.78799	3.78161	1.02779	3.09936	2.44523	3.67022	2.79764	2.34055	3.46265	5.05295	1.64431	2.77453	5.83244	3.69406	3.30022	5.93999	7.95988	6.87733		-	-	-	-	-	-	-	-
	interleukin 21 receptor	IL21R	8.03286	9.22803	6.85319	58.8914	75.864	57.2676	9.89938	13.7865	20.203	23.1127	20.1098	17.4751	1.65432	5.75401	12.7009	13.6276	25.5348	30.8589	88.0707	75.6323	8.22233	9.29808	8.96585	13.7633	11.1906	8.58202	21.6415	21.2224	5.48104	6.65886	6.48049	12.5598	8.8006	10.89	13.2665	26.1339		7.9631	-	-	2.90286	-	-	-	-
	interleukin 22	IL22	2.92104	5.27316	9.96828	20.3074	15.5618	27.5733	15.5562	17.4145	13.2365	15.7167	15.0823	8.73753	3.86007	1.56928	8.79292	6.8138	4.16895	6.45884	12.311	5.67242	4.11117	7.7484	5.70554	5.50533	7.46037	7.02166	15.5819	11.1165	3.28863	4.43924	4.53635	12.5598	17.6012	11.88	22.553	26.1339		-	-	-	-	-	-	-	-
	interleukin 23, alpha subunit p19	IL23A	13.8749	10.5463	14.3294	42.6455	27.2332	33.9364	18.3846	23.9449	16.7198	17.5657	18.0988	7.76669	3.86007	7.32329	7.81593	7.7872	11.9857	16.5059	17.9929	17.0173	12.3335	13.9471	17.1166	12.8458	11.1906	9.36221	14.7162	15.1589	26.309	38.2885	23.3298	31.7689	19.8013	13.86	19.8997	16.5056		-	-	-	-	-	-	-	-
	interleukin 23 receptor	IL23R	7.3026	9.22803	4.36112	18.2766	19.4523	27.5733	11.3136	7.98165	3.48328	11.0941	15.0823	7.76669	4.96295	6.27711	9.76991	11.6808	5.21118	10.0471	23.6749	15.1265	16.4447	4.64904	13.0412	11.9282	9.32546	5.46129	6.05963	13.1377	5.48104	12.2079	3.24025	13.2986	15.401	13.86	18.5731	22.0075		-	-	-	-	-	-	-	-
	CD25	IL2RA	2.92104	4.61402	3.73811	30.4611	15.5618	21.2102	5.65679	13.7865	6.96657	13.8676	4.02196	6.79585	3.30863	3.66165	5.86195	3.8936	4.16895	7.17649	11.364	7.56323	2.05558	3.09936	8.15078	4.58777	13.0556	6.24147	4.32831	6.06354	2.19242	6.65886	0.648049	8.12693	6.60045	12.87	13.2665	11.0037		-	-	-	-	-	-	-	-
	interleukin 2 receptor, beta	IL2RB	9.49338	5.27316	9.34526	34.5225	50.576	55.1466	16.2633	18.8657	22.9897	23.1127	22.1208	20.3876	7.72014	9.93875	18.5628	8.7606	8.85901	16.5059	35.9859	13.2356	544.729	559.434	397.758	345.918	38.2344	34.3281	38.9548	40.4236	3.83673	3.32943	3.8883	13.2986	20.9014	16.83	19.8997	20.632		-	-	-	-	0.67352	-	-	-
	interleukin 2 receptor, gamma (severe combined immunodeficiency)	IL2RG	5.84208	6.59145	7.47621	40.6147	50.576	36.0574	5.65679	6.53044	4.8766	3.69804	4.02196	4.85418	2.20575	2.09237	5.86195	8.7606	3.12671	5.7412	8.52297	6.61782	6.16675	3.09936	4.07539	3.67022	2.79764	6.24147	6.05963	5.05295	2.74052	3.88434	1.2961	5.91049	11.0007	6.92999	11.9398	24.7584		-	-	-	-	-	-	-	-
	interleukin 3 (colony-stimulating factor, multiple)	IL3	5.11182	11.2055	6.23018	22.3381	25.288	23.3312	6.36389	14.5121	7.66322	20.3392	11.0604	7.76669	6.61726	8.36948	10.7469	9.734	5.21118	13.6353	12.311	8.50863	13.3613	13.9471	6.52062	9.17555	12.1231	10.9226	9.52228	15.1589	7.67346	7.76867	9.07269	11.821	15.401	19.8	18.5731	19.2565		-	-	-	-	-	-	-	-
	Major Th2-type cytokine; also stimulate DC differentiation, primarily produced by immune cells	IL4	2.19078	9.88718	5.60716	12.1844	35.0141	38.1784	9.89938	19.5913	13.9331	21.2637	9.0494	4.85418	4.41151	3.66165	5.86195	7.7872	13.028	12.2	27.4629	16.0719	17.4725	17.0465	8.96585	19.2687	8.39292	10.1424	7.79095	10.1059	3.83673	5.54905	5.83244	9.60455	18.7013	9.89999	14.5931	17.8811		-	-	-	-	-	-	-	-
	interleukin 5 (colony-stimulating factor, eosinophil)	IL5	5.11182	9.88718	7.47621	22.3381	33.0689	29.6943	10.6065	5.80483	12.5398	15.7167	12.0659	5.82502	2.75719	7.84638	2.93097	13.6276	9.90125	13.6353	21.7809	16.0719	14.3891	10.8478	11.4111	14.6809	10.258	9.36221	12.1193	14.1483	8.76967	6.65886	9.07269	8.86574	14.301	12.87	15.9198	30.2603		-	-	-	-	-	-	-	-
	Stimulate lymphocyte (TBNK) differentiation	IL7	29.9407	26.3658	24.9207	60.9221	75.864	61.5096	24.0414	21.0425	14.6298	23.1127	19.1043	6.79585	15.4403	18.8313	10.7469	12.6542	28.6615	22.2471	35.9859	17.9627	3.08337	7.7484	10.596	3.67022	18.6509	15.6037	14.7162	10.1059	33.9825	22.7511	20.7376	28.0748	14.301	12.87	25.2063	26.1339		2.44125	-	-	-	-	-	-	-
	CXCR1, CXCR2	IL8R	11.6842	15.8195	12.4604	48.7377	36.9594	55.1466	14.142	13.0609	15.3264	18.4902	12.0659	12.6209	8.27158	9.41566	9.76991	14.601	6.77454	15.7883	20.8339	10.3994	10.2779	13.9471	8.15078	12.8458	7.46037	12.4829	20.7759	18.1906	6.57725	13.8726	7.77659	13.2986	22.0015	18.81	19.8997	22.0075		-	-	-	-	-	-	-	-
	T cell cytokine, stimulatory	IL9	1.46052	1.31829	1.86905	10.1537	3.89046	8.48409	2.8284	3.62802	6.96657	5.54706	3.01647	2.91251	0.551439	2.09237	2.93097	3.8936	1.04224	5.02355	2.84099	0.945403	2.05558	3.09936	0.815078	2.75266	3.73019	2.34055	8.65661	6.06354	2.74052	2.21962	1.2961	1.47762	6.60045	1.98	7.95988	5.50187		-	-	-	-	-	-	-	-
	interferon regulatory factor 4	IRF4	2.19078	5.27316	5.60716	18.2766	21.3975	16.9682	10.6065	15.9633	16.0231	19.4147	17.0933	16.5042	1646.04	1585.49	4579.16	4341.37	178.222	172.236	94.6996	64.2874	1608.49	1593.85	1844.52	1816.76	7.46037	6.24147	6.92529	11.1165	3.83673	4.99415	3.8883	11.0822	12.1008	6.92999	14.5931	16.5056		-	-	2.76046	0.453655	1.14331	-	-	-
	interferon regulatory factor 8	IRF8	3.6513	2.63658	6.85319	20.3074	23.3428	21.2102	6.36389	8.70725	9.05654	21.2637	10.0549	2.91251	3.30863	6.27711	10.7469	10.7074	6.25342	7.17649	14.2049	12.2902	10.2779	5.42388	4.89047	4.58777	5.59528	5.46129	7.79095	10.1059	3.83673	4.99415	4.53635	4.43287	20.9014	18.81	21.2263	28.8848		-	-	-	-	-	-	-	-
	integrin, alpha L (antigen CD11A (p180), lymphocyte function-associated antigen 1; alpha polypeptide [truncated]	ITGAL	2.92104	1.97744	3.73811	12.1844	9.72615	21.2102	6.36389	6.53044	7.66322	12.0186	10.0549	6.79585	1.65432	2.09237	0.976991	4.867	2.60559	5.02355	9.46996	2.83621	4.11117	1.54968	2.44523	4.58777	3.73019	7.02166	8.65661	6.06354	2.74052	5.54905	5.18439	9.60455	17.6012	11.88	11.9398	20.632		-	-	-	-	-	-	-	-
	IL2-inducible T-cell kinase	ITK	3.6513	9.88718	6.85319	26.3996	31.1237	19.0892	4.94969	13.0609	12.5398	23.1127	9.0494	12.6209	18.1975	13.0773	57.6425	64.2444	15.1124	16.5059	22.7279	29.3075	4.11117	9.29808	17.1166	6.42288	6.52782	8.58202	15.5819	14.1483	3.28863	4.99415	4.53635	8.12693	16.5011	11.88	22.553	20.632		-	-	3.89729	-	-	-	-	-
	JAK3 is predominantly expressed in immune cells and transduces a signal in response to its activation via tyrosine phosphorylation by interleukin receptors.	JAK3	5.84208	5.93231	3.11509	26.3996	36.9594	44.5415	9.19229	7.98165	8.35988	13.8676	21.1153	7.76669	19.3004	10.9849	65.4584	50.6168	20.3236	25.8354	75.7597	51.0518	10.2779	6.97356	12.2262	10.0931	16.7858	6.24147	10.3879	10.1059	8.76967	6.65886	17.4973	22.1643	13.2009	29.7	23.8796	20.632		-	-	3.83273	2.74728	-	-	-	-
	v-kit Hardy-Zuckerman 4 feline sarcoma viral oncogene homolog	KIT	4.38156	5.93231	5.60716	56.8606	35.0141	38.1784	7.77809	5.80483	9.05654	12.9431	5.02745	8.73753	1.65432	7.32329	8.79292	8.7606	5.21118	9.32944	11.364	9.45403	10.2779	5.42388	4.07539	6.42288	21.4486	13.2631	189.58	147.546	5.48104	8.87849	30.4583	28.0748	11.0007	8.90999	11.9398	15.1301		-	-	-	-	-	9.71218	-	-
	killer cell lectin-like receptor subfamily B, member 1	KLRB1	5.11182	3.29573	8.09923	14.2152	17.5071	29.6943	4.94969	11.6097	9.05654	8.32058	4.02196	7.76669	2.20575	3.13855	5.86195	4.867	6.25342	3.58825	14.2049	6.61782	8.22233	8.52324	3.26031	13.7633	2.79764	4.6811	10.3879	6.06354	6.02915	7.76867	3.8883	10.3434	15.401	8.90999	17.2464	13.7547		-	-	-	-	-	-	-	-
	killer cell lectin-like receptor subfamily D, member 1	KLRD1	2.92104	5.93231	2.49207	22.3381	27.2332	23.3312	4.24259	3.62802	6.26991	10.1696	13.0714	10.6792	2.20575	1.04618	4.88496	5.8404	3.12671	5.7412	6.62897	10.3994	7.19454	5.42388	0.815078	5.50533	5.59528	7.80184	10.3879	10.1059	3.83673	1.66472	7.12854	7.38812	4.4003	9.89999	9.28653	13.7547		-	-	-	-	-	-	-	-
	Activation/ Effector	Klrg1	1.46052	0.659145	6.85319	14.2152	13.6166	16.9682	1.4142	9.43286	2.78663	7.39607	3.01647	1.94167	1.10288	2.61546	2.93097	2.9202	1.56335	6.45884	8.52297	6.61782	6.16675	3.09936	2.44523	1.83511	0.932546	2.34055	6.92529	6.06354	2.19242	1.66472	2.5922	4.43287	7.70052	5.93999	5.30659	5.50187		-	-	-	-	-	-	-	-
	Exhaustion/ suppression	LAG3	6.57234	5.93231	8.72225	6.09221	13.6166	19.0892	7.07099	13.7865	2.78663	4.62255	9.0494	2.91251	3.30863	2.61546	5.86195	2.9202	3.64783	5.7412	9.46996	3.78161	9.25012	2.32452	3.26031	8.25799	24.2462	28.0866	27.7012	41.4342	3.28863	6.10396	3.8883	11.0822	6.60045	12.87	27.8596	28.8848		-	-	-	-	-	-	-	-
	hypothetical protein LOC284757	LOC284757	105.888	92.9395	100.306	308.672	274.277	322.395	12.7278	12.3353	15.3264	14.7921	8.04391	10.6792	5.51439	3.66165	13.6779	5.8404	36.9994	48.0825	58.7138	61.4512	6.16675	3.8742	7.3357	7.34044	199.565	192.705	384.354	328.442	4.38483	3.88434	3.8883	5.17168	2.20015	10.89	14.5931	15.1301		3.02656	-	-	1.41234	-	1.8171	-	-
	LON peptidase N-terminal domain and ring finger 2	LONRF2	21.1775	19.7744	9.34526	69.0451	103.097	91.2039	79.1951	55.8715	69.6657	8.32058	14.0768	10.6792	116.905	115.08	124.078	148.93	54.1963	81.0944	52.0848	49.161	402.894	386.645	341.518	320.227	26.1113	14.0433	14.7162	26.2754	2.74052	5.54905	5.83244	15.515	232.116	224.73	336.968	313.606		5.23581	-	1.17683	0.748357	0.83814	-	-	1.42406
	Lymphotoxin alpha, a member of the tumor necrosis factor family, is a cytokine produced by lymphocytes	LTA	3.6513	5.27316	7.47621	12.1844	19.4523	16.9682	4.94969	7.25604	6.96657	9.24509	5.02745	5.82502	2.20575	2.61546	8.79292	4.867	3.12671	5.7412	10.417	3.78161	3.08337	4.64904	9.78093	4.58777	5.59528	2.34055	7.79095	7.07413	1.64431	5.54905	3.24025	6.6493	8.8006	13.86	11.9398	16.5056		-	-	-	-	-	-	-	-
	NKG2 also known as CD159a (Cluster of Differentiation 159a) is an activating receptor for natural killer cells.	NKG2	9.49338	13.1829	17.4445	12.1844	40.8498	16.9682	9.19229	7.25604	16.7198	19.4147	11.0604	12.6209	6.61726	4.70783	6.83894	8.7606	4.69006	13.6353	20.8339	11.3448	11.3057	6.97356	12.2262	14.6809	31.7066	27.3064	13.8506	12.1271	4.93294	5.54905	6.48049	13.2986	14.301	14.85	21.2263	16.5056		-	-	-	-	-	-	-	-
	tumor antigen	NY-ESO-1	2195.89	2258.89	2412.95	5064.66	4728.86	5128.63	9.19229	6.53044	8.35988	14.7921	7.03842	6.79585	2.75719	2.61546	5.86195	6.8138	4.16895	6.45884	14.2049	11.3448	2.05558	2.32452	2.44523	2.75266	1.86509	2.34055	4.32831	11.1165	2.19242	6.10396	3.8883	6.6493	16.5011	19.8	19.8997	23.3829		2.17279	-	-	-	-	-	-	-
	programmed cell death 1, PD1	PDCD1	1.46052	1.31829	3.11509	6.09221	3.89046	4.24204	5.65679	7.98165	3.48328	7.39607	7.03842	2.91251	1.65432	0.523092	2.93097	5.8404	3.64783	7.89414	7.57597	3.78161	3.08337	2.32452	2.44523	2.75266	3.73019	5.46129	1.73132	7.07413	1.64431	1.10981	7.77659	5.91049	2.20015	6.92999	5.30659	15.1301		-	-	-	-	-	-	-	-
	Activation/ Effector	Perforin	0.73026	3.95487	3.11509	4.06147	9.72615	14.8472	1.4142	7.25604	2.08997	7.39607	1.00549	2.91251	2.75719	2.09237	7.81593	1.9468	3.12671	5.02355	8.52297	7.56323	7.19454	3.8742	1.63016	2.75266	9.32546	7.02166	6.05963	7.07413	2.19242	3.32943	3.24025	13.2986	7.70052	7.91999	7.95988	6.87733		-	-	-	-	-	-	-	-
	protein phosphotase I	PPP1R16B	0.73026	3.29573	5.60716	16.2459	15.5618	4.24204	2.1213	7.98165	5.57325	4.62255	5.02745	1.94167	2.75719	6.27711	4.88496	5.8404	2.08447	5.7412	14.2049	9.45403	119.224	139.471	197.249	202.78	3.73019	2.34055	7.79095	7.07413	4.38483	4.43924	4.53635	12.5598	24.2016	16.83	13.2665	24.7584		-	-	-	-	1.54633	-	-	-
	prostaglandin E receptor 4 (subtype EP4)	PTGER4	25.5591	23.0701	23.0517	50.7684	64.1926	82.7199	36.7691	37.0058	35.5295	36.9804	25.1372	13.5917	21.5061	21.9699	16.6088	16.5478	6.25342	11.4824	26.5159	19.8535	8.22233	8.52324	4.89047	7.34044	100.715	92.0617	252.773	269.828	77.2827	74.9122	98.5035	91.6126	30.8021	27.72	34.4928	38.5131		-	-	-	-	-	2.71091	1.24916	-
	SH2 domain containing 1A, associated with X-linked lymphoproliferative disease.	SH2D1A	5.84208	6.59145	3.11509	18.2766	21.3975	23.3312	16.2633	17.4145	20.203	7.39607	10.0549	10.6792	5.51439	3.66165	3.90796	9.734	4.69006	9.32944	12.311	8.50863	4.11117	11.6226	6.52062	12.8458	5.59528	4.6811	6.05963	9.09532	7.67346	5.54905	5.83244	9.60455	11.0007	8.90999	13.2665	11.0037		-	-	-	-	-	-	-	-
	shroom family member 3	SHROOM3	2.92104	3.95487	8.09923	58.8914	31.1237	44.5415	8.48519	6.53044	7.66322	9.24509	8.04391	4.85418	2.20575	5.23092	5.86195	14.601	9.90125	13.6353	17.0459	8.50863	3.08337	2.32452	2.44523	9.17555	1.86509	8.58202	9.52228	7.07413	0.548104	4.43924	11.0168	20.6867	18.7013	12.87	18.5731	13.7547		-	-	-	-	-	-	-	-
	Single Ig IL-1-related receptor	SIGIRR	9.49338	13.1829	14.9524	32.4918	25.288	21.2102	4.94969	5.07923	5.57325	11.0941	6.03293	3.88334	2.20575	2.61546	2.93097	5.8404	5.7323	10.0471	7.57597	7.56323	5.13896	4.64904	4.89047	7.34044	69.941	67.0958	27.7012	29.3071	254.868	239.719	336.338	287.398	5.50037	5.93999	18.5731	15.1301		-	-	-	-	-	0.416007	1.26112	-
	SLAM family member 6	SLAMF6	15.3355	25.7067	18.6905	77.168	64.1926	80.5988	19.7988	13.0609	25.0796	31.4333	23.1262	16.5042	14.8888	8.89257	24.4248	75.9252	32.8304	27.9883	52.0848	29.3075	29.806	26.3445	27.7126	28.4442	31.7066	24.1857	19.0446	24.2542	8.76967	20.5315	17.4973	85.7021	31.9022	29.7	34.4928	88.0299		3.71588	-	-	-	-	-	3.52203	-
	SLAM family member 7 (CS1)	SLAMF7	48.1972	73.8243	63.5478	371.625	330.689	373.3	9.89938	13.7865	9.75319	17.5657	5.02745	8.73753	635.257	681.066	250.11	197.6	473.696	568.378	295.463	268.495	9.25012	3.8742	8.15078	6.42288	8.39292	12.4829	8.65661	9.09532	59.7434	67.1435	256.628	206.867	1.10007	7.91999	19.8997	8.2528		5.79629	-	0.340122	0.541187	-	-	-	-
	suppressor of cytokine signaling	SOCS1	9.49338	8.56889	14.3294	81.2295	71.9735	57.2676	37.4762	31.9266	36.9228	19.4147	19.1043	16.5042	39.7036	44.4628	54.7115	48.67	29.1826	32.2942	40.7208	33.0891	64.7509	71.2852	70.9118	80.7448	77.4014	61.6345	134.178	123.292	36.723	44.9473	69.3413	67.9707	24.2016	30.69	51.7392	53.6432		-	-	-	-	1.11483	1.85182	1.6813	1.91983
	TCR gamma alternate reading frame protein	TARP	2.92104	5.27316	1.86905	16.2459	3.89046	19.0892	12.7278	4.35363	4.8766	7.39607	9.0494	8.73753	2.75719	0.523092	5.86195	1.9468	2.60559	7.17649	9.46996	6.61782	7.19454	3.09936	0.815078	3.67022	3.73019	1.56037	6.05963	2.02118	2.19242	4.99415	4.53635	8.86574	12.1008	8.90999	10.6132	11.0037		-	-	-	-	-	-	-	-
	T-box 21, Th1 cell-specific transcription factor that controls the expression of the hallmark Th1 cytokine, interferon-gamma (IFNG).	TBX21	2.92104	3.95487	4.36112	10.1537	11.6714	10.6051	12.7278	10.1585	8.35988	10.1696	11.0604	4.85418	2.75719	3.13855	6.83894	6.8138	4.69006	9.32944	11.364	10.3994	2.05558	0.77484	4.89047	5.50533	6.52782	6.24147	12.1193	17.18	4.38483	5.54905	5.83244	6.6493	14.301	14.85	15.9198	26.1339		-	-	-	-	-	-	-	-
	tandem C2 domains, nuclear	TC2N	1.46052	1.31829	2.49207	14.2152	11.6714	4.24204	4.94969	13.0609	3.48328	10.1696	6.03293	1.94167	37.4978	45.509	36.1487	29.202	3.12671	4.3059	6.62897	3.78161	1.02779	4.64904	0.815078	0.917555	2.79764	1.56037	6.05963	3.03177	76.1865	69.9181	118.593	130.031	51.7035	74.2499	83.5787	137.547		-	-	-	-	-	-	1.70168	1.75561
	T cell specific HMG box	TCF7	26.2894	25.7067	16.1985	83.2602	110.878	89.0829	38.1833	34.1034	29.2596	40.6784	28.1537	15.5334	18.1975	7.84638	17.5858	19.468	73.4777	73.9179	66.2897	51.9972	172.669	193.71	170.351	200.027	157.6	117.028	125.521	124.303	24.6647	31.6296	12.3129	21.4255	74.8051	117.81	153.891	180.186		4.15314	-	-	0.802513	1.01092	0.90968	-	1.73443
	Exhaustion/ suppression	TIM-3	2.19078	4.61402	3.11509	20.3074	11.6714	25.4523	4.24259	9.43286	6.96657	8.32058	4.02196	8.73753	6.06583	5.75401	6.83894	13.6276	7.81677	7.89414	13.2579	13.2356	20.5558	22.4704	45.6444	51.3831	9.32546	6.24147	16.4476	19.2012	3.28863	3.32943	5.83244	13.2986	9.90067	4.94999	21.2263	13.7547		-	-	-	-	-	-	-	-
	toll-like receptor 5	TLR5	2.92104	3.95487	4.98414	22.3381	19.4523	23.3312	4.94969	8.70725	9.75319	9.24509	12.0659	1.94167	9.37446	7.84638	6.83894	13.6276	17.1969	14.353	22.7279	10.3994	7.19454	5.42388	0.815078	3.67022	4.66273	3.90092	8.65661	8.08472	13.1545	14.4275	44.7154	39.8958	18.7013	14.85	25.2063	24.7584		-	-	-	-	-	-	-	-
	toll-like receptor 7	TLR7	5.11182	4.61402	5.60716	16.2459	17.5071	12.7261	31.1123	30.4754	28.5629	441.915	375.047	371.83	4.41151	2.61546	3.90796	5.8404	3.12671	12.2	19.8869	12.2902	3.08337	9.29808	2.44523	6.42288	11.1906	7.02166	7.79095	8.08472	2.19242	3.88434	5.83244	7.38812	9.90067	16.83	18.5731	15.1301		-	-	-	-	-	-	-	-
	toll-like receptor 8	TLR8	5.11182	5.93231	9.96828	22.3381	15.5618	33.9364	12.0207	13.0609	8.35988	9.24509	6.03293	5.82502	6.06583	4.70783	5.86195	2.9202	3.12671	10.0471	14.2049	8.50863	6.16675	7.7484	4.89047	3.67022	6.52782	4.6811	5.19397	6.06354	3.83673	3.88434	7.77659	5.17168	14.301	13.86	7.95988	13.7547		-	-	-	-	-	-	-	-
	toll-like receptor 9	TLR9	1.46052	2.63658	2.49207	42.6455	33.0689	21.2102	7.77809	13.0609	11.1465	11.0941	7.03842	7.76669	5.51439	4.70783	15.6319	15.5744	2.60559	9.32944	20.8339	13.2356	5.13896	7.7484	2.44523	3.67022	7.46037	7.02166	10.3879	13.1377	3.83673	6.10396	7.77659	12.5598	15.401	6.92999	11.9398	26.1339		-	-	-	-	-	-	-	-
	Th1-type cytokine; multiple functions; in general immune-stimulating,tumor necrosis factor	TNF	2.92104	1.31829	4.98414	16.2459	19.4523	8.48409	9.19229	10.1585	9.75319	9.24509	10.0549	5.82502	2.75719	3.13855	6.83894	5.8404	2.60559	5.02355	8.52297	7.56323	4.11117	5.42388	4.07539	4.58777	6.52782	3.12074	6.92529	7.07413	3.28863	3.32943	7.12854	8.12693	5.50037	9.89999	14.5931	13.7547		-	-	-	-	-	-	-	-
	expressed mature B lymphocytes, tumor necrosis factor receptor superfamily, member 17	TNFRSF17	6.57234	8.56889	5.60716	32.4918	13.6166	25.4523	6.36389	7.25604	7.66322	8.32058	7.03842	0.970836	6.06583	5.23092	1.95398	1.9468	3.12671	9.32944	13.2579	6.61782	8.22233	8.52324	4.89047	5.50533	6.52782	8.58202	10.3879	10.1059	6.57725	3.88434	5.18439	7.38812	12.1008	21.78	14.5931	15.1301		-	-	-	-	-	-	-	-
	OX40/CD134	TNFRSF4	5.84208	7.2506	13.0834	22.3381	31.1237	27.5733	8.48519	13.7865	11.1465	13.8676	10.0549	7.76669	4.96295	8.36948	10.7469	15.5744	5.21118	14.353	17.9929	6.61782	8.22233	8.52324	8.15078	5.50533	7.46037	6.24147	13.8506	11.1165	5.48104	6.65886	9.72074	8.86574	11.0007	16.83	17.2464	16.5056		-	-	-	-	-	-	-	-
	CD30, activated B and T-cells	TNFRSF8	147.513	196.425	186.282	26.3996	31.1237	21.2102	8.48519	7.98165	6.96657	22.1882	15.0823	12.6209	2.75719	2.09237	3.90796	7.7872	15.6335	18.6589	59.6608	52.9426	6.16675	5.42388	4.89047	11.9282	1.86509	3.12074	6.05963	2.02118	3.83673	8.32358	14.2571	8.12693	6.60045	5.93999	5.30659	11.0037		0.148492	-	-	3.28362	-	-	-	-
	4-1-BB	TNFRSF9	10.2236	5.93231	8.72225	201.043	180.906	125.14	10.6065	15.2377	5.57325	16.6412	9.0494	5.82502	0.551439	3.66165	6.83894	2.9202	5.21118	12.9177	22.7279	19.8535	7.19454	5.42388	12.2262	8.25799	8.39292	7.02166	24.2385	21.2224	15.895	24.9707	64.8049	62.799	24.2016	17.82	90.212	82.528		20.3829	-	-	-	-	-	3.12251	4.11074
	RANKL	TNFSF11	0.73026	4.61402	5.60716	14.2152	9.72615	12.7261	5.65679	7.25604	8.35988	15.7167	12.0659	8.73753	4.41151	5.23092	11.7239	7.7872	3.64783	3.58825	10.417	10.3994	2.05558	5.42388	8.15078	4.58777	4.66273	9.36221	12.1193	8.08472	4.38483	9.43339	6.48049	11.0822	5.50037	8.90999	13.2665	15.1301		-	-	-	-	-	-	-	-
	CD30L, tumor necrosis factor (ligand) superfamily, member 8	TNFSF8	4.38156	7.2506	7.47621	26.3996	19.4523	21.2102	9.89938	16.6889	11.1465	16.6412	15.0823	8.73753	7.1687	5.23092	16.6088	10.7074	5.21118	9.32944	15.1519	10.3994	417.283	534.639	768.618	734.961	7.46037	5.46129	12.9849	9.09532	6.57725	6.65886	3.8883	11.821	12.1008	14.85	26.5329	23.3829		-	-	-	-	1.57952	-	-	-
	T cell receptor alpha locus	TRAalpha	6.57234	1.97744	4.98414	6.09221	5.83569	14.8472	4.24259	5.07923	4.8766	9.24509	5.02745	1.94167	4.96295	8.36948	10.7469	7.7872	3.64783	3.58825	7.57597	2.83621	1.02779	3.09936	3.26031	2.75266	1.86509	3.12074	1.73132	1.01059	2.19242	3.32943	0.648049	3.69406	5.50037	1.98	6.63323	8.2528		-	-	-	-	-	-	-	-
	T cell receptor beta constant 1	TRBC1	2.92104	6.59145	3.73811	10.1537	17.5071	14.8472	7.77809	8.70725	7.66322	19.4147	11.0604	13.5917	2.20575	4.18474	3.90796	10.7074	3.12671	6.45884	14.2049	8.50863	1.02779	3.8742	4.89047	5.50533	6.52782	7.02166	6.92529	8.08472	5.48104	6.10396	4.53635	14.0374	9.90067	13.86	39.7994	20.632		-	-	-	-	-	-	-	-
	T cell receptor gamma constant 2	TRGC2	7.3026	11.2055	6.85319	26.3996	11.6714	27.5733	14.142	15.2377	13.2365	23.1127	21.1153	10.6792	5.51439	7.84638	13.6779	11.6808	7.81677	10.7647	26.5159	9.45403	9.25012	3.8742	5.70554	4.58777	4.66273	8.58202	14.7162	8.08472	2.19242	4.43924	5.18439	14.7762	14.301	13.86	18.5731	16.5056		-	-	-	-	-	-	-	-
	tumor antigen-melanoma	TRP-2	2.19078	5.27316	5.60716	18.2766	11.6714	23.3312	12.7278	13.7865	11.8432	11.0941	19.1043	8.73753	2.75719	3.13855	9.76991	4.867	5.21118	10.0471	15.1519	6.61782	8.22233	6.97356	6.52062	5.50533	5.59528	7.02166	3.46265	7.07413	2.19242	6.65886	7.12854	13.2986	12.1008	9.89999	11.9398	4.1264		-	-	-	-	-	-	-	-
	ubiquitin specific peptidase 9, Y-linked (fat facets-like, Drosophila)	USP9Y	4.38156	1.31829	8.72225	6.09221	9.72615	8.48409	25.4556	17.4145	18.1131	48.0745	48.2635	34.9501	1.10288	4.70783	5.86195	15.5744	3.64783	7.17649	11.364	9.45403	5.13896	3.8742	4.07539	3.67022	4.66273	5.46129	3.46265	14.1483	6.57725	18.3119	20.7376	28.0748	27.5019	16.83	29.1862	28.8848		-	-	-	-	-	-	-	-
	tetratricopeptide repeats, minor histocompatibility antigen male stem cell	UTY	0.73026	4.61402	6.23018	16.2459	17.5071	16.9682	6.36389	7.98165	5.57325	10.1696	13.0714	2.91251	2.75719	2.61546	8.79292	13.6276	4.69006	12.9177	12.311	6.61782	3.08337	6.97356	5.70554	2.75266	7.46037	3.90092	6.05963	10.1059	1.09621	2.21962	8.42464	8.86574	5.50037	9.89999	7.95988	17.8811		-	-	-	-	-	-	-	-

## Sheet: Table S5A
Table S5A. Flow cytometry analyses of T lymphcytes and IHC from CT-26 tumor tissues
Group # mouse No.	Lymph-cytes	CD3	CD4								CD8						IHC
	Total, %	Total, %	Total, %	CD69+ cells in CD4, %	PD1+ cells in CD4, %	PD-L1+ in CD4, %	ICOS+ cells in CD4, %	OX40+ cells in CD4, %	Treg CD25+Foxp3+ cells in CD4, %	CD25+Foxp3- cells in CD4, %	Total, %	CD69+ cells in CD8, %	PD1+ cells in CD8, %	PD-L1+ in CD8, %	ICOS+ cells in CD8, %	OX40+ cells in CD8, %	pERK (H- score)	tERK (H-score)	pERK /tERK
untreated #4	4.2	1.63333	0.3	34.15	49.05	89.9	88.4	67.85	36.9	1.4	0.566667	62.3	89.85	89.65	36.8	12.4	140	104	1.34615
untreated #5	4.1	1.56667	0.3	38.6	54.25	93.95	91.1	76.6	40.55	2.45	0.533333	57.55	89.3	95.75	52.4	24.1	150	110	1.36364
untreated #6	8.7	3.53333	0.533333	25.35	45.9	89.3	87.7	65.85	40.3	4.05	1.5	45.05	91.1	90.3	74.6	32.75	140	120	1.16667
IgG2a #4	6.26667	2.4	0.3	29.6	45.1	88.45	88.45	56.25	41.45	3.75	1	48.25	92	83	68.15	33.1	145	128	1.13281
IgG2a #5	7.33333	4.06667	0.6	17.15	36.45	91.85	83.3	47.8	28.95	2.5	2	43.4	91	97.65	70.65	18.15	130	135	0.962963
IgG2a #6	2.83333	1.2	0.233333	24.15	43.15	94.25	88.25	66.45	34.6	2.15	0.4	46.55	87.8	97.45	66.6	20.75	171	146	1.17123
MEK/IgG2a #4	13.7333	6.46667	1.93333	14.05	42.85	95.1	85.3	60.35	34.05	4.05	1.63333	38.75	75.4	96.55	36.05	12.8	63	142	0.443662
MEK/IgG2a #5	13.2	6.36667	1.93333	11.45	36.75	97.05	90	59.45	28.85	5.9	2.2	36.65	77.65	98.55	45.4	12.1	37	143	0.258741
MEK/IgG2a #6	5.2	2.36667	1	20.15	46.05	95.35	86.2	72.15	34.75	6.7	0.2	32.5	39.6	96	23.95	4.75	53	134	0.395522
PD-1 #4	5.9	2.9	0.5	35.95	31.75	97.3	89	72.05	41.55	4.45	1.16667	58.8	83	99.15	50.4	10.45	90	115	0.782609
PD-1 #5	2.53333	1.06667	0.2	26.3	18.05	96.25	89.8	64.45	45.2	2.3	0.3	57	67.5	98	68.15	25.25	75	110	0.681818
PD-1 #6	8.66667	3.23333	0.633333	18.25	36.4	87.05	87.4	50.05	39.6	3.05	1.23333	43.75	86.75	93.7	76.95	15.05	155	112	1.38393
MEK/PD-1 #4	11.7	5	0.9	24.05	33.1	95.25	93.3	75.4	49.55	5.75	2.76667	18.3	80	94.7	43.45	5.15	27	114	0.236842
MEK/PD-1 #5	9.7	4.96667	1.1	19.15	35.2	96.75	93.75	78.95	44.85	4.75	2.9	26.55	83.85	96.15	40.55	8.25	37	120	0.308333
MEK/PD-1 #6	17.4667	10.6333	1.9	14.55	26.15	96.6	87.35	61.05	36.95	3.45	6.53333	26.45	77.8	98.55	48.2	7.65	52	126	0.412698
MEK/untreated	1.8902	2.25743	4.29412	0.465341	0.842158	1.05254	0.978668	0.912744	0.829299	2.10759	1.55128	0.654336	0.712858	1.05586	0.643468	0.428159	0.355814	1.25449	0.283229
PD1/untreated	1.00588	1.06931	1.17647	0.820591	0.577748	1.02727	0.996257	0.887066	1.07304	1.24051	1.03846	0.967556	0.877891	1.05495	1.19353	0.732852	0.744186	1.00898	0.734783
MEK+PD1/untreated	2.28627	3.05941	3.44118	0.588685	0.633043	1.05656	1.02695	1.02425	1.1155	1.76582	4.69231	0.432383	0.894172	1.04969	0.807082	0.303971	0.269767	1.07784	0.2471
MEK/IgG2a	1.95538	1.98261	4.29412	0.643865	1.00762	1.04717	1.00577	1.12581	0.93	1.98214	1.18627	0.780753	0.711411	1.04675	0.513145	0.411806	0.343049	1.02445	0.336065
PD1/IgG2a	1.04057	0.93913	1.17647	1.1354	0.691259	1.02204	1.02385	1.09413	1.20333	1.16667	0.794118	1.15449	0.876108	1.04585	0.951801	0.704861	0.717489	0.823961	0.871854
MEK+PD1/IgG2a	2.36511	2.68696	3.44118	0.814528	0.757418	1.05117	1.05538	1.26334	1.25095	1.66071	3.58824	0.515919	0.921518	1.04063	0.643622	0.292361	0.26009	0.880196	0.293196

## Sheet: Table S5B
Table S5B. Univariate test P values
Variable	Hypothesis	Fold of changes (mean)	Raw P value	Step down bonferroni adjusted P value
% total lymphocytes	MEK/IgG2a vs untreated	1.8902	0.1088	0.3883
% total lymphocytes	PD-1 vs untreated	1.00588	0.9909	1
% total lymphocytes	MEK/PD-1 vs untreated	2.28627	0.0287	0.1526
% total lymphocytes	MEK/IgG2a vs IgG2a	1.95538	0.0971	0.3883
% total lymphocytes	PD-1 vs IgG2a	1.04057	0.9366	1
% total lymphocytes	MEK/PD-1 vs IgG2a	2.36511	0.0254	0.1526
% total CD3	MEK/IgG2a vs untreated	2.25743	0.1139	0.4556
% total CD3	PD-1 vs untreated	1.06931	0.9218	1
% total CD3	MEK/PD-1 vs untreated	3.05941	0.0188	0.1128
% total CD3	MEK/IgG2a vs IgG2a	1.98261	0.1568	0.4704
% total CD3	PD-1 vs IgG2a	0.93913	0.9218	1
% total CD3	MEK/PD-1 vs IgG2a	2.68696	0.0266	0.1328
% total CD4	MEK/IgG2a vs untreated	4.29412	0.0019	0.0112
% total CD4	PD-1 vs untreated	1.17647	0.8254	1
% total CD4	MEK/PD-1 vs untreated	3.44118	0.01	0.0399
% total CD4	MEK/IgG2a vs IgG2a	4.29412	0.0019	0.0112
% total CD4	PD-1 vs IgG2a	1.17647	0.8254	1
% total CD4	MEK/PD-1 vs IgG2a	3.44118	0.01	0.0399
% Treg CD25+ Foxp3+ cells in CD4	MEK/IgG2a vs untreated	0.829299	0.1014	0.4181
% Treg CD25+ Foxp3+ cells in CD4	PD-1 vs untreated	1.07304	0.4558	0.9117
% Treg CD25+ Foxp3+ cells in CD4	MEK/PD-1 vs untreated	1.1155	0.2448	0.7343
% Treg CD25+ Foxp3+ cells in CD4	MEK/IgG2a vs IgG2a	0.93	0.5251	0.9117
% Treg CD25+ Foxp3+ cells in CD4	PD-1 vs IgG2a	1.20333	0.0836	0.4181
% Treg CD25+ Foxp3+ cells in CD4	MEK/PD-1 vs IgG2a	1.25095	0.0385	0.2311
% CD25+Foxp3- cells in CD4	MEK/IgG2a vs untreated	2.10759	0.0129	0.0772
% CD25+Foxp3- cells in CD4	PD-1 vs untreated	1.24051	0.5243	1
% CD25+Foxp3- cells in CD4	MEK/PD-1 vs untreated	1.76582	0.0602	0.2408
% CD25+Foxp3- cells in CD4	MEK/IgG2a vs IgG2a	1.98214	0.0173	0.0866
% CD25+Foxp3- cells in CD4	PD-1 vs IgG2a	1.16667	0.6373	1
% CD25+Foxp3- cells in CD4	MEK/PD-1 vs IgG2a	1.66071	0.0804	0.2413
% CD69+ cells in CD4	MEK/IgG2a vs untreated	0.465341	0.0075	0.0448
% CD69+ cells in CD4	PD-1 vs untreated	0.820591	0.2879	0.8638
% CD69+ cells in CD4	MEK/PD-1 vs untreated	0.588685	0.0279	0.1394
% CD69+ cells in CD4	MEK/IgG2a vs IgG2a	0.643865	0.1391	0.5565
% CD69+ cells in CD4	PD-1 vs IgG2a	1.1354	0.5541	0.8638
% CD69+ cells in CD4	MEK/PD-1 vs IgG2a	0.814528	0.423	0.8638
% ICOS+ cells in CD4	MEK/IgG2a vs untreated	0.978668	0.3814	1
% ICOS+ cells in CD4	PD-1 vs untreated	0.996257	0.8756	1
% ICOS+ cells in CD4	MEK/PD-1 vs untreated	1.02695	0.2681	1
% ICOS+ cells in CD4	MEK/IgG2a vs IgG2a	1.00577	0.8266	1
% ICOS+ cells in CD4	PD-1 vs IgG2a	1.02385	0.3502	1
% ICOS+ cells in CD4	MEK/PD-1 vs IgG2a	1.05538	0.0433	0.2596
% OX40+ cells in CD4	MEK/IgG2a vs untreated	0.912744	0.4143	1
% OX40+ cells in CD4	PD-1 vs untreated	0.887066	0.2959	1
% OX40+ cells in CD4	MEK/PD-1 vs untreated	1.02425	0.8172	1
% OX40+ cells in CD4	MEK/IgG2a vs IgG2a	1.12581	0.3406	1
% OX40+ cells in CD4	PD-1 vs IgG2a	1.09413	0.4709	1
% OX40+ cells in CD4	MEK/PD-1 vs IgG2a	1.26334	0.0632	0.379
% PD-1+ cells in CD4	MEK/IgG2a vs untreated	0.842158	0.1344	0.2689
% PD-1+ cells in CD4	PD-1 vs untreated	0.577748	0.0014	0.0084
% PD-1+ cells in CD4	MEK/PD-1 vs untreated	0.633043	0.0035	0.0175
% PD-1+ cells in CD4	MEK/IgG2a vs IgG2a	1.00762	0.9461	0.9461
% PD-1+ cells in CD4	PD-1 vs IgG2a	0.691259	0.0236	0.0943
% PD-1+ cells in CD4	MEK/PD-1 vs IgG2a	0.757418	0.0621	0.1863
% PD-L1+ in CD4	MEK/IgG2a vs untreated	1.05254	0.0884	0.4418
% PD-L1+ in CD4	PD-1 vs untreated	1.02727	0.3486	0.6973
% PD-L1+ in CD4	MEK/PD-1 vs untreated	1.05656	0.0695	0.4173
% PD-L1+ in CD4	MEK/IgG2a vs IgG2a	1.04717	0.1216	0.4418
% PD-L1+ in CD4	PD-1 vs IgG2a	1.02204	0.4497	0.6973
% PD-L1+ in CD4	MEK/PD-1 vs IgG2a	1.05117	0.0963	0.4418
% total CD8	MEK/IgG2a vs untreated	1.55128	0.6327	1
% total CD8	PD-1 vs untreated	1.03846	0.9726	1
% total CD8	MEK/PD-1 vs untreated	4.69231	0.007	0.042
% total CD8	MEK/IgG2a vs IgG2a	1.18627	0.8369	1
% total CD8	PD-1 vs IgG2a	0.794118	0.8103	1
% total CD8	MEK/PD-1 vs IgG2a	3.58824	0.0113	0.0564
% CD69+ cells in CD8	MEK/IgG2a vs untreated	0.654336	0.0034	0.0134
% CD69+ cells in CD8	PD-1 vs untreated	0.967556	0.7248	0.7248
% CD69+ cells in CD8	MEK/PD-1 vs untreated	0.432383	0.0001	0.0006
% CD69+ cells in CD8	MEK/IgG2a vs IgG2a	0.780753	0.0696	0.2087
% CD69+ cells in CD8	PD-1 vs IgG2a	1.15449	0.1836	0.3673
% CD69+ cells in CD8	MEK/PD-1 vs IgG2a	0.515919	0.0012	0.0058
% ICOS+ cells in CD8	MEK/IgG2a vs untreated	0.643468	0.0683	0.2732
% ICOS+ cells in CD8	PD-1 vs untreated	1.19353	0.2912	0.8736
% ICOS+ cells in CD8	MEK/PD-1 vs untreated	0.807082	0.2955	0.8736
% ICOS+ cells in CD8	MEK/IgG2a vs IgG2a	0.513145	0.0057	0.0341
% ICOS+ cells in CD8	PD-1 vs IgG2a	0.951801	0.7358	0.8736
% ICOS+ cells in CD8	MEK/PD-1 vs IgG2a	0.643622	0.0281	0.1406
% OX40+ cells in CD8	MEK/IgG2a vs untreated	0.428159	0.0445	0.135
% OX40+ cells in CD8	PD-1 vs untreated	0.732852	0.3111	0.4942
% OX40+ cells in CD8	MEK/PD-1 vs untreated	0.303971	0.0191	0.0957
% OX40+ cells in CD8	MEK/IgG2a vs IgG2a	0.411806	0.0338	0.135
% OX40+ cells in CD8	PD-1 vs IgG2a	0.704861	0.2471	0.4942
% OX40+ cells in CD8	MEK/PD-1 vs IgG2a	0.292361	0.0145	0.087
% PD-1+ cells in CD8	MEK/IgG2a vs untreated	0.712858	0.0145	0.0842
% PD-1+ cells in CD8	PD-1 vs untreated	0.877891	0.238	0.9258
% PD-1+ cells in CD8	MEK/PD-1 vs untreated	0.894172	0.3022	0.9258
% PD-1+ cells in CD8	MEK/IgG2a vs IgG2a	0.711411	0.014	0.0842
% PD-1+ cells in CD8	PD-1 vs IgG2a	0.876108	0.2315	0.9258
% PD-1+ cells in CD8	MEK/PD-1 vs IgG2a	0.921518	0.2943	0.9258
% PD-L1+ in CD8	MEK/IgG2a vs untreated	1.05586	0.1828	1
% PD-L1+ in CD8	PD-1 vs untreated	1.05495	0.1907	1
% PD-L1+ in CD8	MEK/PD-1 vs untreated	1.04969	0.2317	1
% PD-L1+ in CD8	MEK/IgG2a vs IgG2a	1.04675	0.2547	1
% PD-L1+ in CD8	PD-1 vs IgG2a	1.04585	0.2651	1
% PD-L1+ in CD8	MEK/PD-1 vs IgG2a	1.04063	0.3183	1
TERK	MEK/IgG2a vs untreated	1.25449	0.0003	0.0021
TERK	PD-1 vs untreated	1.00898	0.8554	1
TERK	MEK/PD-1 vs untreated	1.07784	0.136	0.4081
TERK	MEK/IgG2a vs IgG2a	1.02445	0.5469	1
TERK	PD-1 vs IgG2a	0.823961	0.0012	0.0058
TERK	MEK/PD-1 vs IgG2a	0.880196	0.0121	0.0486
pERK	MEK/IgG2a vs untreated	0.355814	0.0006	0.0017
pERK	PD-1 vs untreated	0.744186	0.0773	0.0956
pERK	MEK/PD-1 vs untreated	0.269767	0.0002	0.0011
pERK	MEK/IgG2a vs IgG2a	0.343049	0.0004	0.0015
pERK	PD-1 vs IgG2a	0.717489	0.0478	0.0956
pERK	MEK/PD-1 vs IgG2a	0.26009	0.0001	0.0009
pERK/tERK	MEK/IgG2a vs untreated	0.283229	0.0001	0.0006
pERK/tERK	PD-1 vs untreated	0.734783	0.055	0.11
pERK/tERK	MEK/PD-1 vs untreated	0.2471	0.0001	0.0004
pERK/tERK	MEK/IgG2a vs IgG2a	0.336065	0.0007	0.0022
pERK/tERK	PD-1 vs IgG2a	0.871854	0.4054	0.4054
pERK/tERK	MEK/PD-1 vs IgG2a	0.293196	0.0004	0.0016

[truncated: 1 more sheets: Table S6]
